# Supplementary material for: Long noncoding RNA GSEC promotes neutrophil inflammatory activation by supporting PFKFB3-involved glycolytic metabolism in sepsis
Source: PubMed Central journal article supplement (PMC8671582; doi:10.1038/s41419-021-04428-7), 2021-12-14
Supplement: 41419_2021_4428_MOESM3_ESM.pdf [file 41419_2021_4428_MOESM3_ESM.pdf]

**Supplementary Table 1. 33 overlapped lncRNAs of 3 datasets**

| lncRNA            | style | Mean Signal of Group Sepsis(GSE13904) | Mean Signal of Group Control(GSE13904) | Fold Change(GSE13904) | FDR(GSE13904) |
|-------------------|-------|---------------------------------------|----------------------------------------|-----------------------|---------------|
| ENST00000555562.1 | up    | 5.64269                               | 5.347633                               | 1.23                  | 9.81E-03      |
| NONHSAT100917.2   | up    | 5.842245                              | 5.506454                               | 1.26                  | 3.62E-02      |
| NONHSAT211528.1   | up    | 6.050075                              | 5.652882                               | 1.32                  | 9.81E-03      |
| NONHSAT198787.1   | up    | 3.893279                              | 3.450267                               | 1.36                  | 4.93E-04      |
| NONHSAT094090.2   | up    | 5.915071                              | 5.468026                               | 1.36                  | 3.62E-02      |
| NONHSAT216480.1   | up    | 4.77362                               | 4.323711                               | 1.37                  | 1.99E-02      |
| ENST00000441749.1 | up    | 5.701936                              | 5.248951                               | 1.37                  | 7.03E-04      |
| ENST00000607967.1 | up    | 6.627577                              | 6.167803                               | 1.38                  | 9.81E-03      |
| NONHSAT164381.1   | up    | 5.2277885                             | 4.6309415                              | 1.51                  | 1.41E-04      |
| NONHSAT006710.2   | up    | 6.541353                              | 5.749878                               | 1.73                  | 0.00E+00      |
| XR_941546.1       | up    | 4.576459                              | 3.763056                               | 1.76                  | 2.82E-04      |
| ENST00000519323.1 | up    | 5.246531                              | 4.239477                               | 2.01                  | 0.00E+00      |
| NONHSAT150799.1   | up    | 5.336991                              | 4.303819                               | 2.05                  | 0.00E+00      |
| NONHSAT200806.1   | up    | 6.808582                              | 5.74038                                | 2.10                  | 0.00E+00      |
| NONHSAT010176.2   | up    | 6.6163675                             | 5.4890875                              | 2.32                  | 0.00E+00      |
| NONHSAT034261.2   | up    | 6.053029                              | 4.836349                               | 2.32                  | 0.00E+00      |
| ENST00000629441.1 | up    | 6.686111                              | 5.215516                               | 2.77                  | 0.00E+00      |
| NONHSAT081776.2   | up    | 5.8891755                             | 4.4299625                              | 2.82                  | 0.00E+00      |
| XR_926068.1       | up    | 6.836203                              | 5.210496                               | 3.09                  | 0.00E+00      |
| NONHSAT181667.1   | up    | 7.24628                               | 5.43127                                | 3.52                  | 0.00E+00      |
| NONHSAT160878.1   | up    | 7.482223                              | 5.257068                               | 4.68                  | 0.00E+00      |
| NONHSAT131038.2   | down  | 6.9119155                             | 7.8947645                              | -1.98                 | 1.41E-04      |
| NONHSAT002346.2   | down  | 7.263435                              | 8.137209                               | -1.83                 | 7.03E-04      |
| NONHSAT009146.2   | down  | 6.620488                              | 7.39816                                | -1.71                 | 1.71E-03      |
| ENST00000608064.1 | down  | 5.772428                              | 6.536868                               | -1.70                 | 0.00E+00      |
| NONHSAT134698.2   | down  | 5.851227                              | 6.599442                               | -1.68                 | 0.00E+00      |
| NONHSAT131053.2   | down  | 7.244893                              | 7.982082                               | -1.67                 | 4.47E-03      |
| ENST00000612387.1 | down  | 5.528728                              | 6.147776                               | -1.54                 | 2.82E-04      |
| NR_003945.1       | down  | 7.30771                               | 7.907173                               | -1.52                 | 1.99E-02      |
| NONHSAT115567.2   | down  | 3.56243                               | 4.121644                               | -1.47                 | 7.03E-04      |
| XR_918449.1       | down  | 4.430633                              | 4.980176                               | -1.46                 | 4.47E-03      |
| NONHSAT009860.2   | down  | 5.678602                              | 6.153917                               | -1.39                 | 9.81E-03      |
| NONHSAT102622.2   | down  | 4.458923                              | 4.892148                               | -1.35                 | 0.00E+00      |

| <b>p-value(GSE13904)</b> | <b>Mean Signal of Group Sepsis(GSE28750)</b> | <b>Mean Signal of Group Control(GSE28750)</b> | <b>Fold Change(GSE28750)</b> | <b>FDR(GSE28750)</b> |
|--------------------------|----------------------------------------------|-----------------------------------------------|------------------------------|----------------------|
| 8.11E-03                 | 6.093388                                     | 5.659928                                      | 1.35                         | 1.40E-03             |
| 2.46E-02                 | 6.242706                                     | 5.505013                                      | 1.67                         | 0.00E+00             |
| 1.12E-02                 | 6.560805                                     | 5.618696                                      | 1.92                         | 0.00E+00             |
| 1.61E-03                 | 3.38204                                      | 3.031732667                                   | 1.28                         | 2.47E-03             |
| 2.56E-02                 | 6.402553                                     | 5.862841                                      | 1.45                         | 1.40E-03             |
| 1.68E-02                 | 4.135485                                     | 3.612178                                      | 1.44                         | 0.00E+00             |
| 1.85E-03                 | 5.765401                                     | 5.377021                                      | 1.31                         | 1.56E-02             |
| 8.57E-03                 | 7.126769                                     | 6.754033                                      | 1.29                         | 1.56E-02             |
| 9.70E-04                 | 5.6502635                                    | 4.7737335                                     | 1.86                         | 2.42E-04             |
| 1.13E-04                 | 6.815032                                     | 6.130347                                      | 1.61                         | 0.00E+00             |
| 1.09E-03                 | 4.556502                                     | 3.292295                                      | 2.40                         | 0.00E+00             |
| 4.65E-04                 | 5.928382                                     | 4.192942                                      | 3.33                         | 0.00E+00             |
| 2.08E-04                 | 6.272206                                     | 5.289751                                      | 1.98                         | 4.83E-04             |
| 8.40E-05                 | 6.877776                                     | 6.009045                                      | 1.83                         | 0.00E+00             |
| 3.83E-04                 | 7.1454605                                    | 5.8481645                                     | 2.54                         | 0.00E+00             |
| 1.02E-04                 | 5.749597                                     | 4.304224                                      | 2.72                         | 0.00E+00             |
| 3.60E-05                 | 7.463312                                     | 5.711721                                      | 3.37                         | 0.00E+00             |
| 4.65E-05                 | 6.8753395                                    | 4.945581                                      | 3.86                         | 0.00E+00             |
| 2.50E-05                 | 6.250143                                     | 4.926417                                      | 2.50                         | 0.00E+00             |
| 2.50E-05                 | 7.833467                                     | 6.204771                                      | 3.09                         | 0.00E+00             |
| 1.90E-05                 | 8.146526                                     | 6.117758                                      | 4.08                         | 0.00E+00             |
| 8.91E-04                 | 8.518912                                     | 9.174583                                      | -1.58                        | 0.00E+00             |
| 2.55E-03                 | 7.106514                                     | 7.857799                                      | -1.68                        | 4.83E-04             |
| 5.78E-03                 | 6.864264                                     | 7.950837                                      | -2.12                        | 0.00E+00             |
| 6.60E-05                 | 5.659053                                     | 6.171996                                      | -1.43                        | 1.40E-03             |
| 4.60E-04                 | 4.76585                                      | 6.304235                                      | -2.90                        | 0.00E+00             |
| 7.79E-03                 | 6.822975                                     | 7.640092                                      | -1.76                        | 4.83E-04             |
| 2.23E-03                 | 5.906223                                     | 6.552621                                      | -1.57                        | 4.83E-04             |
| 2.19E-02                 | 6.764101                                     | 7.639629                                      | -1.83                        | 2.32E-04             |
| 3.89E-03                 | 5.481512                                     | 5.892777                                      | -1.33                        | 7.19E-03             |
| 8.74E-03                 | 4.579933                                     | 5.199388                                      | -1.54                        | 1.40E-03             |
| 1.69E-02                 | 5.85262                                      | 6.461651                                      | -1.53                        | 1.40E-03             |
| 3.38E-04                 | 4.750693                                     | 5.251968                                      | -1.42                        | 0.00E+00             |

| <b>p-value(GSE28750)</b> | <b>Mean Signal of Group Sepsis(GSE64457)</b> | <b>Mean Signal of Group Control(GSE64457)</b> | <b>Fold Change(GSE64457)</b> | <b>FDR(GSE64457)</b> |
|--------------------------|----------------------------------------------|-----------------------------------------------|------------------------------|----------------------|
| 4.71E-03                 | 3.671216                                     | 3.367591                                      | 1.23                         | 4.81E-02             |
| 2.41E-04                 | 6.759132                                     | 5.846787                                      | 1.88                         | 2.24E-02             |
| 6.72E-04                 | 4.44461                                      | 3.328611                                      | 2.17                         | 5.87E-03             |
| 3.40E-03                 | 2.468579                                     | 2.052398                                      | 1.33                         | 4.81E-02             |
| 3.81E-03                 | 6.631587                                     | 5.653006                                      | 1.97                         | 1.65E-03             |
| 6.97E-04                 | 4.174868                                     | 3.30942                                       | 1.82                         | 4.81E-02             |
| 1.34E-02                 | 5.257129                                     | 4.535429                                      | 1.65                         | 2.24E-02             |
| 1.59E-02                 | 7.83121                                      | 7.302178                                      | 1.44                         | 3.33E-02             |
| 2.17E-03                 | 3.311429                                     | 2.55595                                       | 1.69                         | 3.33E-02             |
| 8.10E-04                 | 6.546593                                     | 5.868371                                      | 1.60                         | 3.86E-03             |
| 6.87E-04                 | 9.745832                                     | 6.529862                                      | 9.29                         | 0.00E+00             |
| 3.13E-04                 | 6.68225                                      | 5.323492                                      | 2.56                         | 1.65E-03             |
| 2.57E-03                 | 6.958998                                     | 6.332423                                      | 1.54                         | 5.87E-03             |
| 1.25E-03                 | 8.674465                                     | 7.728832                                      | 1.93                         | 1.50E-02             |
| 7.50E-05                 | 8.816649                                     | 8.215784                                      | 1.52                         | 4.07E-02             |
| 7.85E-04                 | 2.511083                                     | 2.103692                                      | 1.33                         | 4.81E-02             |
| 1.90E-05                 | 6.355196                                     | 5.68277                                       | 1.59                         | 3.33E-02             |
| 2.05E-05                 | 8.7355735                                    | 7.9329695                                     | 1.78                         | 1.67E-02             |
| 1.10E-03                 | 8.541502                                     | 7.665375                                      | 1.84                         | 9.12E-03             |
| 3.22E-04                 | 5.230427                                     | 4.495019                                      | 1.66                         | 4.81E-02             |
| 1.90E-05                 | 7.466609                                     | 6.219441                                      | 2.37                         | 3.86E-03             |
| 6.89E-04                 | 6.715401                                     | 7.4032955                                     | -1.61                        | 2.70E-02             |
| 4.52E-03                 | 3.976935                                     | 4.744202                                      | -1.70                        | 9.12E-03             |
| 2.99E-04                 | 4.116092                                     | 5.61524                                       | -2.83                        | 9.12E-03             |
| 7.85E-03                 | 3.62846                                      | 4.543093                                      | -1.89                        | 1.65E-03             |
| 2.00E-05                 | 5.440052                                     | 6.541045                                      | -2.15                        | 1.50E-02             |
| 5.22E-03                 | 2.330815                                     | 2.866392                                      | -1.45                        | 3.86E-03             |
| 4.17E-03                 | 2.955728                                     | 3.621478                                      | -1.59                        | 2.24E-02             |
| 3.57E-03                 | 2.511739                                     | 4.244674                                      | -3.32                        | 0.00E+00             |
| 1.77E-02                 | 3.574083                                     | 4.113434                                      | -1.45                        | 2.24E-02             |
| 8.36E-03                 | 3.230642                                     | 4.335509                                      | -2.15                        | 2.33E-03             |
| 6.92E-03                 | 2.202598                                     | 2.562813                                      | -1.28                        | 2.33E-03             |
| 9.27E-04                 | 5.690786                                     | 6.211382                                      | -1.43                        | 1.50E-02             |

| <b>p-value(GSE64457)</b> |
|--------------------------|
| 1.88E-02                 |
| 4.98E-03                 |
| 1.09E-03                 |
| 1.61E-02                 |
| 1.64E-04                 |
| 1.46E-02                 |
| 4.53E-03                 |
| 8.70E-03                 |
| 1.18E-02                 |
| 7.62E-04                 |
| 2.40E-05                 |
| 2.47E-04                 |
| 1.02E-03                 |
| 3.09E-03                 |
| 1.04E-02                 |
| 1.31E-02                 |
| 9.21E-03                 |
| 5.71E-03                 |
| 1.56E-03                 |
| 1.42E-02                 |
| 6.03E-04                 |
| 8.94E-03                 |
| 2.59E-03                 |
| 2.79E-03                 |
| 1.94E-04                 |
| 3.82E-03                 |
| 7.10E-04                 |
| 5.95E-03                 |
| 8.00E-05                 |
| 8.64E-03                 |
| 4.18E-04                 |
| 3.20E-04                 |
| 3.27E-03                 |
