# Supplementary material for: Long noncoding RNA GSEC promotes neutrophil inflammatory activation by supporting PFKFB3-involved glycolytic metabolism in sepsis
Source: PubMed Central journal article supplement (PMC8671582; doi:10.1038/s41419-021-04428-7), 2021-12-14
Supplement: 41419_2021_4428_MOESM4_ESM.pdf [file 41419_2021_4428_MOESM4_ESM.pdf]

**Supplementary Table 2 . 878 overlapped mRNAs of 3 datasets.**

| Gene Symbol | Gene ID | Gene Description                                                                                   | style |
|-------------|---------|----------------------------------------------------------------------------------------------------|-------|
| AASDHPPT    | 60496   | aminoadipate-semialdehyde dehydrogenase-phosphopantetheinyl transferase                            | down  |
| ABHD16A     | 7920    | abhydrolase domain containing 16A                                                                  | up    |
| ACAA1       | 30      | acetyl-CoA acyltransferase 1                                                                       | up    |
| ACER3       | 55331   | alkaline ceramidase 3                                                                              | up    |
| ACVR1B      | 91      | activin A receptor type IB                                                                         | up    |
| ACVR2A      | 92      | activin A receptor type IIA                                                                        | down  |
| ADAM17      | 6868    | ADAM metallopeptidase domain 17                                                                    | up    |
| ADAM19      | 8728    | ADAM metallopeptidase domain 19                                                                    | up    |
| ADAM28      | 10863   | ADAM metallopeptidase domain 28                                                                    | down  |
| ADAM9       | 8754    | ADAM metallopeptidase domain 9                                                                     | up    |
| ADGRE2      | 30817   | adhesion G protein-coupled receptor E2                                                             | up    |
| ADGRG3      | 222487  | adhesion G protein-coupled receptor G3                                                             | up    |
| ADK         | 132     | adenosine kinase                                                                                   | down  |
| ADM         | 133     | adrenomedullin                                                                                     | up    |
| ADORA3      | 140     | adenosine A3 receptor                                                                              | up    |
| AGAP4       | 119016  | ArfGAP with GTPase domain, ankyrin repeat and PH domain 4                                          | down  |
| AGFG1       | 3267    | ArfGAP with FG repeats 1                                                                           | up    |
| AGPAT2      | 10555   | 1-acylglycerol-3-phosphate O-acyltransferase 2                                                     | up    |
| AGTRAP      | 57085   | angiotensin II receptor-associated protein                                                         | up    |
| AIM2        | 9447    | absent in melanoma 2                                                                               | up    |
| AKIRIN2     | 55122   | akirin 2                                                                                           | up    |
| ALDH3B1     | 221     | aldehyde dehydrogenase 3 family, member B1                                                         | up    |
| ALDOA       | 226     | aldolase A, fructose-bisphosphate                                                                  | up    |
| ALG8        | 79053   | ALG8, alpha-1,3-glucosyltransferase                                                                | down  |
| ALPL        | 249     | alkaline phosphatase, liver/bone/kidney                                                            | up    |
| AMD1        | 262     | adenosylmethionine decarboxylase 1                                                                 | down  |
| AMMECR1     | 9949    | Alport syndrome, mental retardation, midface hypoplasia and elliptocytosis chromosomal region gene | down  |
| AMPH        | 273     | amphiphysin                                                                                        | up    |
| ANAPC1      | 64682   | anaphase promoting complex subunit 1                                                               | down  |
| ANAPC13     | 25847   | anaphase promoting complex subunit 13                                                              | down  |
| ANAPC15     | 25906   | anaphase promoting complex subunit 15                                                              | up    |
| ANKRD11     | 29123   | ankyrin repeat domain 11                                                                           | down  |
| ANKRD44     | 91526   | ankyrin repeat domain 44                                                                           | down  |

|          |        |                                                                     |      |
|----------|--------|---------------------------------------------------------------------|------|
| ANO10    | 55129  | anoctamin 10                                                        | up   |
| ANXA1    | 301    | annexin A1                                                          | up   |
| ANXA3    | 306    | annexin A3                                                          | up   |
| AP3M1    | 26985  | adaptor-related protein complex 3, mu 1 subunit                     | down |
| APH1B    | 83464  | APH1B gamma secretase subunit                                       | up   |
| APLP2    | 334    | amyloid beta (A4) precursor-like protein 2                          | up   |
| APOL3    | 80833  | apolipoprotein L, 3                                                 | down |
| ARG1     | 383    | arginase 1                                                          | up   |
| ARHGAP24 | 83478  | Rho GTPase activating protein 24                                    | up   |
| ARID1B   | 57492  | AT rich interactive domain 1B (SWI1-like)                           | down |
| ARIH2    | 10425  | ariadne RBR E3 ubiquitin protein ligase 2                           | down |
| ARL4A    | 10124  | ADP-ribosylation factor like GTPase 4A                              | up   |
| ARL8B    | 55207  | ADP-ribosylation factor like GTPase 8B                              | up   |
| ARPC1B   | 10095  | actin related protein 2/3 complex subunit 1B                        | up   |
| ARSD     | 414    | arylsulfatase D                                                     | up   |
| ASAH1    | 427    | N-acylsphingosine amidohydrolase (acid ceramidase) 1                | up   |
| ASPH     | 444    | aspartate beta-hydroxylase                                          | up   |
| ASXL1    | 171023 | additional sex combs like transcriptional regulator 1               | down |
| ATG9A    | 79065  | autophagy related 9A                                                | up   |
| ATP11B   | 23200  | ATPase, class VI, type 11B                                          | up   |
| ATP13A3  | 79572  | ATPase type 13A3                                                    | up   |
| ATP2B1   | 490    | ATPase, Ca <sup>++</sup> transporting, plasma membrane 1            | down |
| ATP6V0A2 | 23545  | ATPase, H <sup>+</sup> transporting, lysosomal V0 subunit a2        | down |
| ATP6V0E1 | 8992   | ATPase, H <sup>+</sup> transporting, lysosomal 9kDa, V0 subunit e1  | up   |
| ATP6V1C1 | 528    | ATPase, H <sup>+</sup> transporting, lysosomal 42kDa, V1 subunit C1 | up   |
| ATP8B4   | 79895  | ATPase, class I, type 8B, member 4                                  | up   |
| ATP9A    | 10079  | ATPase, class II, type 9A                                           | up   |
| ATXN7    | 6314   | ataxin 7                                                            | down |
| AZI2     | 64343  | 5-azacytidine induced 2                                             | up   |
| BANP     | 54971  | BTG3 associated nuclear protein                                     | down |
| BATF     | 10538  | basic leucine zipper transcription factor, ATF-like                 | up   |
| BCAT1    | 586    | branched chain amino-acid transaminase 1, cytosolic                 | up   |
| BCL6     | 604    | B-cell CLL/lymphoma 6                                               | up   |
| BCLAF1   | 9774   | BCL2-associated transcription factor 1                              | down |
| BCOR     | 54880  | BCL6 corepressor                                                    | down |

|          |           |                                                            |      |
|----------|-----------|------------------------------------------------------------|------|
| BIK      | 638       | BCL2-interacting killer (apoptosis-inducing)               | up   |
| BLOC1S1  | 2647      | biogenesis of lysosomal organelles complex-1, subunit 1    | up   |
| BPI      | 671       | bactericidal/permeability-increasing protein               | up   |
| BRD1     | 23774     | bromodomain containing 1                                   | down |
| BRI3     | 25798     | brain protein I3                                           | up   |
| BTBD11   | 121551    | BTB (POZ) domain containing 11                             | down |
| BTN2A2   | 10385     | butyrophilin, subfamily 2, member A2                       | down |
| BTN3A1   | 11119     | butyrophilin, subfamily 3, member A1                       | down |
| BTN3A2   | 11118     | butyrophilin, subfamily 3, member A2                       | down |
| BUB3     | 9184      | BUB3 mitotic checkpoint protein                            | down |
| BZW2     | 28969     | basic leucine zipper and W2 domains 2                      | down |
| C11orf71 | 54494     | chromosome 11 open reading frame 71                        | up   |
| C16orf54 | 283897    | chromosome 16 open reading frame 54                        | down |
| C19orf60 | 55049     | chromosome 19 open reading frame 60                        | down |
| C19orf66 | 55337     | chromosome 19 open reading frame 66                        | down |
| C1orf162 | 128346    | chromosome 1 open reading frame 162                        | up   |
| C1orf174 | 339448    | chromosome 1 open reading frame 174                        | down |
| C1QA     | 712       | complement component 1, q subcomponent, A chain            | up   |
| C2orf68  | 388969    | chromosome 2 open reading frame 68                         | down |
| C3AR1    | 719       | complement component 3a receptor 1                         | up   |
| C5orf30  | 90355     | chromosome 5 open reading frame 30                         | up   |
| C8orf88  | 100127983 | chromosome 8 open reading frame 88                         | up   |
| CA4      | 762       | carbonic anhydrase IV                                      | up   |
| CAB39    | 51719     | calcium binding protein 39                                 | up   |
| CAMK1D   | 57118     | calcium/calmodulin-dependent protein kinase ID             | down |
| CAMKK2   | 10645     | calcium/calmodulin-dependent protein kinase kinase 2, beta | up   |
| CAPG     | 822       | capping protein (actin filament), gelsolin-like            | up   |
| CAPN3    | 825       | calpain 3                                                  | up   |
| CARD6    | 84674     | caspase recruitment domain family, member 6                | up   |
| CASS4    | 57091     | Cas scaffolding protein family member 4                    | down |
| CAST     | 831       | calpastatin                                                | up   |
| CBLL1    | 79872     | Cbl proto-oncogene-like 1, E3 ubiquitin protein ligase     | down |
| CBS      | 875       | cystathionine-beta-synthase                                | up   |
| CBX7     | 23492     | chromobox homolog 7                                        | down |
| CCDC71L  | 168455    | coiled-coil domain containing 71-like                      | up   |

|          |        |                                                                              |      |
|----------|--------|------------------------------------------------------------------------------|------|
| CCDC84   | 338657 | coiled-coil domain containing 84                                             | down |
| CCDC88C  | 440193 | coiled-coil domain containing 88C                                            | down |
| CCDC92   | 80212  | coiled-coil domain containing 92                                             | down |
| CCND3    | 896    | cyclin D3                                                                    | up   |
| CCNL2    | 81669  | cyclin L2                                                                    | down |
| CCR3     | 1232   | chemokine (C-C motif) receptor 3                                             | down |
| CD163    | 9332   | CD163 molecule                                                               | up   |
| CD177    | 57126  | CD177 molecule                                                               | up   |
| CD4      | 920    | CD4 molecule                                                                 | down |
| CD47     | 961    | CD47 molecule                                                                | down |
| CD55     | 1604   | CD55 molecule, decay accelerating factor for complement (Cromer blood group) | up   |
| CD63     | 967    | CD63 molecule                                                                | up   |
| CD82     | 3732   | CD82 molecule                                                                | up   |
| CDC14A   | 8556   | cell division cycle 14A                                                      | down |
| CDC25A   | 993    | cell division cycle 25A                                                      | up   |
| CDC42EP3 | 10602  | CDC42 effector protein (Rho GTPase binding) 3                                | up   |
| CDC42SE2 | 56990  | CDC42 small effector 2                                                       | down |
| CDIP1    | 29965  | cell death-inducing p53 target 1                                             | down |
| CDK5RAP2 | 55755  | CDK5 regulatory subunit associated protein 2                                 | up   |
| CEBPA    | 1050   | CCAAT/enhancer binding protein (C/EBP), alpha                                | up   |
| CEP164   | 22897  | centrosomal protein 164kDa                                                   | down |
| CFAP20   | 29105  | cilia and flagella associated protein 20                                     | down |
| CHPT1    | 56994  | choline phosphotransferase 1                                                 | up   |
| CIAO1    | 9391   | cytosolic iron-sulfur assembly component 1                                   | down |
| CIITA    | 4261   | class II, major histocompatibility complex, transactivator                   | down |
| CKAP4    | 10970  | cytoskeleton-associated protein 4                                            | up   |
| CLEC4D   | 338339 | C-type lectin domain family 4, member D                                      | up   |
| CLIC1    | 1192   | chloride intracellular channel 1                                             | up   |
| CNNM3    | 26505  | cyclin and CBS domain divalent metal cation transport mediator 3             | down |
| CNOT6L   | 246175 | CCR4-NOT transcription complex subunit 6-like                                | down |
| CNOT7    | 29883  | CCR4-NOT transcription complex subunit 7                                     | down |
| COA1     | 55744  | cytochrome c oxidase assembly factor 1 homolog                               | down |
| COLGALT1 | 79709  | collagen beta(1-O)galactosyltransferase 1                                    | up   |
| COPS7B   | 64708  | COP9 signalosome subunit 7B                                                  | down |
| CORO2A   | 7464   | coronin, actin binding protein, 2A                                           | up   |

|            |        |                                                             |      |
|------------|--------|-------------------------------------------------------------|------|
| CR1        | 1378   | complement component (3b/4b) receptor 1 (Knops blood group) | up   |
| CREB1      | 1385   | cAMP responsive element binding protein 1                   | down |
| CREBL2     | 1389   | cAMP responsive element binding protein-like 2              | down |
| CRTAP      | 10491  | cartilage associated protein                                | down |
| CSE1L      | 1434   | CSE1 chromosome segregation 1-like (yeast)                  | down |
| CSGALNACT1 | 55790  | chondroitin sulfate N-acetylgalactosaminyltransferase 1     | up   |
| CSGALNACT2 | 55454  | chondroitin sulfate N-acetylgalactosaminyltransferase 2     | up   |
| CSNK1G2    | 1455   | casein kinase 1, gamma 2                                    | down |
| CST7       | 8530   | cystatin F (leukocystatin)                                  | up   |
| CTDSPL2    | 51496  | CTD small phosphatase like 2                                | down |
| CTSB       | 1508   | cathepsin B                                                 | up   |
| CTSC       | 1075   | cathepsin C                                                 | down |
| CTSD       | 1509   | cathepsin D                                                 | up   |
| CWF19L2    | 143884 | CWF19-like 2, cell cycle control ( <i>S. pombe</i> )        | down |
| CXorf40A   | 91966  | chromosome X open reading frame 40A                         | down |
| CYB561     | 1534   | cytochrome b561                                             | down |
| CYLD       | 1540   | cylindromatosis (turban tumor syndrome)                     | down |
| CYP1B1     | 1545   | cytochrome P450, family 1, subfamily B, polypeptide 1       | up   |
| CYSLTR1    | 10800  | cysteinyl leukotriene receptor 1                            | down |
| CYSTM1     | 84418  | cysteine-rich transmembrane module containing 1             | up   |
| CYYR1      | 116159 | cysteine/tyrosine-rich 1                                    | up   |
| DAAM2      | 23500  | dishevelled associated activator of morphogenesis 2         | up   |
| DACH1      | 1602   | dachshund family transcription factor 1                     | up   |
| DBT        | 1629   | dihydrolipoamide branched chain transacylase E2             | down |
| DCAF16     | 54876  | DDB1 and CUL4 associated factor 16                          | down |
| DCP1A      | 55802  | decapping mRNA 1A                                           | down |
| DCTN2      | 10540  | dynactin 2 (p50)                                            | up   |
| DDAH2      | 23564  | dimethylarginine dimethylaminohydrolase 2                   | up   |
| DDIAS      | 220042 | DNA damage-induced apoptosis suppressor                     | up   |
| DDX17      | 10521  | DEAD (Asp-Glu-Ala-Asp) box helicase 17                      | down |
| DDX18      | 8886   | DEAD (Asp-Glu-Ala-Asp) box polypeptide 18                   | down |
| DDX24      | 57062  | DEAD (Asp-Glu-Ala-Asp) box helicase 24                      | down |
| DDX27      | 55661  | DEAD (Asp-Glu-Ala-Asp) box polypeptide 27                   | down |
| DDX5       | 1655   | DEAD (Asp-Glu-Ala-Asp) box helicase 5                       | down |
| DDX50      | 79009  | DEAD (Asp-Glu-Ala-Asp) box polypeptide 50                   | down |

|          |        |                                                                  |      |
|----------|--------|------------------------------------------------------------------|------|
| DHRS13   | 147015 | dehydrogenase/reductase (SDR family) member 13                   | up   |
| DIAPH2   | 1730   | diaphanous-related formin 2                                      | up   |
| DIDO1    | 11083  | death inducer-obliterator 1                                      | down |
| DIRC2    | 84925  | disrupted in renal carcinoma 2                                   | up   |
| DKC1     | 1736   | dyskeratosis congenita 1, dyskerin                               | down |
| DLC1     | 10395  | DLC1 Rho GTPase activating protein                               | up   |
| DLG5     | 9231   | discs, large homolog 5 (Drosophila)                              | down |
| DNAJC13  | 23317  | DnaJ (Hsp40) homolog, subfamily C, member 13                     | up   |
| DNAJC4   | 3338   | DnaJ (Hsp40) homolog, subfamily C, member 4                      | up   |
| DNAJC5   | 80331  | DnaJ (Hsp40) homolog, subfamily C, member 5                      | up   |
| DNASE1L1 | 1774   | deoxyribonuclease I-like 1                                       | up   |
| DND1     | 373863 | DND microRNA-mediated repression inhibitor 1                     | down |
| DNMT3A   | 1788   | DNA (cytosine-5-)-methyltransferase 3 alpha                      | down |
| DOK3     | 79930  | docking protein 3                                                | up   |
| DPY19L3  | 147991 | dpy-19-like 3 (C. elegans)                                       | up   |
| DSC2     | 1824   | desmocollin 2                                                    | up   |
| DSE      | 29940  | dermatan sulfate epimerase                                       | up   |
| DYRK2    | 8445   | dual specificity tyrosine-(Y)-phosphorylation regulated kinase 2 | down |
| DYSF     | 8291   | dysferlin                                                        | up   |
| ECHDC3   | 79746  | enoyl-CoA hydratase domain containing 3                          | up   |
| EDEM1    | 9695   | ER degradation enhancer, mannosidase alpha-like 1                | down |
| EFCAB14  | 9813   | EF-hand calcium binding domain 14                                | down |
| EIF1B    | 10289  | eukaryotic translation initiation factor 1B                      | up   |
| EIF3A    | 8661   | eukaryotic translation initiation factor 3, subunit A            | down |
| EIF4A2   | 1974   | eukaryotic translation initiation factor 4A2                     | down |
| EIF4E3   | 317649 | eukaryotic translation initiation factor 4E family member 3      | up   |
| EIF5B    | 9669   | eukaryotic translation initiation factor 5B                      | down |
| ELAVL1   | 1994   | ELAV like RNA binding protein 1                                  | down |
| EMILIN2  | 84034  | elastin microfibril interfacier 2                                | up   |
| ENO1     | 2023   | enolase 1, (alpha)                                               | up   |
| EP400    | 57634  | E1A binding protein p400                                         | down |
| EPAS1    | 2034   | endothelial PAS domain protein 1                                 | up   |
| ERCC1    | 2067   | excision repair cross-complementation group 1                    | down |
| ERLIN2   | 11160  | ER lipid raft associated 2                                       | up   |
| ERMAP    | 114625 | erythroblast membrane-associated protein (Scianna blood group)   | up   |

|          |        |                                                                      |      |
|----------|--------|----------------------------------------------------------------------|------|
| ESYT2    | 57488  | extended synaptotagmin-like protein 2                                | down |
| ETS2     | 2114   | v-ets avian erythroblastosis virus E26 oncogene homolog 2            | up   |
| EXOC6    | 54536  | exocyst complex component 6                                          | up   |
| EXOSC4   | 54512  | exosome component 4                                                  | up   |
| EXT1     | 2131   | exostosin glycosyltransferase 1                                      | up   |
| F5       | 2153   | coagulation factor V (proaccelerin, labile factor)                   | up   |
| FADS1    | 3992   | fatty acid desaturase 1                                              | up   |
| FAM105A  | 54491  | family with sequence similarity 105, member A                        | up   |
| FAM110B  | 90362  | family with sequence similarity 110, member B                        | up   |
| FAM117B  | 150864 | family with sequence similarity 117, member B                        | down |
| FAM118A  | 55007  | family with sequence similarity 118, member A                        | down |
| FAM118B  | 79607  | family with sequence similarity 118, member B                        | up   |
| FAM160A2 | 84067  | family with sequence similarity 160, member A2                       | up   |
| FAM172A  | 83989  | family with sequence similarity 172, member A                        | up   |
| FAM200B  | 285550 | family with sequence similarity 200, member B                        | up   |
| FAM208B  | 54906  | family with sequence similarity 208, member B                        | down |
| FAM20C   | 56975  | family with sequence similarity 20, member C                         | up   |
| FAM73A   | 374986 | family with sequence similarity 73, member A                         | down |
| FAM89A   | 375061 | family with sequence similarity 89, member A                         | up   |
| FAN1     | 22909  | FANCD2/FANCI-associated nuclease 1                                   | down |
| FANCM    | 57697  | Fanconi anemia complementation group M                               | down |
| FAKP2    | 9855   | FERM, ARH/RhoGEF and pleckstrin domain protein 2                     | down |
| FBXO38   | 81545  | F-box protein 38                                                     | up   |
| FBXO9    | 26268  | F-box protein 9                                                      | up   |
| FBXW2    | 26190  | F-box and WD repeat domain containing 2                              | up   |
| FCAR     | 2204   | Fc fragment of IgA receptor                                          | up   |
| FCER1A   | 2205   | Fc fragment of IgE, high affinity I, receptor for; alpha polypeptide | down |
| FCER1G   | 2207   | Fc fragment of IgE, high affinity I, receptor for; gamma polypeptide | up   |
| FCF1     | 51077  | FCF1 rRNA-processing protein                                         | down |
| FCMR     | 9214   | Fc fragment of IgM receptor                                          | down |
| FEM1C    | 56929  | fem-1 homolog c (C. elegans)                                         | up   |
| FERMT3   | 83706  | fermitin family member 3                                             | up   |
| FGFBP2   | 83888  | fibroblast growth factor binding protein 2                           | down |
| FGFR1OP2 | 26127  | FGFR1 oncogene partner 2                                             | up   |
| FGL2     | 10875  | fibrinogen-like 2                                                    | down |

|          |        |                                                                   |      |
|----------|--------|-------------------------------------------------------------------|------|
| FGR      | 2268   | FGR proto-oncogene, Src family tyrosine kinase                    | up   |
| FIP1L1   | 81608  | factor interacting with PAPOLA and CPSF1                          | down |
| FKBP5    | 2289   | FK506 binding protein 5                                           | up   |
| FKBP9    | 11328  | FK506 binding protein 9                                           | up   |
| FLOT1    | 10211  | flotillin 1                                                       | up   |
| FLOT2    | 2319   | flotillin 2                                                       | up   |
| FLT3     | 2322   | fms-related tyrosine kinase 3                                     | up   |
| FLT3LG   | 2323   | fms-related tyrosine kinase 3 ligand                              | down |
| FLVCR1   | 28982  | feline leukemia virus subgroup C cellular receptor 1              | down |
| FMNL3    | 91010  | formin like 3                                                     | down |
| FN3KRP   | 79672  | fructosamine 3 kinase related protein                             | down |
| FOLR3    | 2352   | folate receptor 3 (gamma)                                         | up   |
| FOXN2    | 3344   | forkhead box N2                                                   | up   |
| FOXN3    | 1112   | forkhead box N3                                                   | down |
| FOXP1    | 27086  | forkhead box P1                                                   | down |
| FUNDC1   | 139341 | FUN14 domain containing 1                                         | down |
| G3BP1    | 10146  | GTPase activating protein (SH3 domain) binding protein 1          | down |
| GADD45A  | 1647   | growth arrest and DNA-damage-inducible, alpha                     | up   |
| GALNT14  | 79623  | polypeptide N-acetylgalactosaminyltransferase 14                  | up   |
| GAPDH    | 2597   | glyceraldehyde-3-phosphate dehydrogenase                          | up   |
| GAS7     | 8522   | growth arrest-specific 7                                          | up   |
| GATC     | 283459 | glutamyl-tRNA(Gln) amidotransferase, subunit C                    | down |
| GBA      | 2629   | glucosidase, beta, acid                                           | up   |
| GCC2     | 9648   | GRIP and coiled-coil domain containing 2                          | down |
| GCNT1    | 2650   | glucosaminyl (N-acetyl) transferase 1, core 2                     | up   |
| GGH      | 8836   | gamma-glutamyl hydrolase (conjugase, folylpolyglutamyl hydrolase) | up   |
| GIMAP4   | 55303  | GTPase, IMAP family member 4                                      | down |
| GLDN     | 342035 | gliomedin                                                         | up   |
| GLTP     | 51228  | glycolipid transfer protein                                       | up   |
| GNG5     | 2787   | guanine nucleotide binding protein (G protein), gamma 5           | up   |
| GNG7     | 2788   | guanine nucleotide binding protein (G protein), gamma 7           | down |
| GNLY     | 10578  | granulysin                                                        | down |
| GOLGA3   | 2802   | golgin A3                                                         | down |
| GPATCH1  | 55094  | G-patch domain containing 1                                       | down |
| GPATCH11 | 253635 | G-patch domain containing 11                                      | down |



|             |             |                                                                                               |           |
|-------------|-------------|-----------------------------------------------------------------------------------------------|-----------|
| GPATCH8     | 23131       | G-patch domain containing 8                                                                   | down      |
| GPR155      | 151556      | G protein-coupled receptor 155                                                                | down      |
| GPR160      | 26996       | G protein-coupled receptor 160                                                                | up        |
| GPR183      | 1880        | G protein-coupled receptor 183                                                                | down      |
| GPR84       | 53831       | G protein-coupled receptor 84                                                                 | up        |
| GRAMD1A     | 57655       | GRAM domain containing 1A                                                                     | up        |
| GRAMD1C     | 54762       | GRAM domain containing 1C                                                                     | down      |
| GRB10       | 2887        | growth factor receptor bound protein 10                                                       | up        |
| GRINA       | 2907        | glutamate receptor, ionotropic, N-methyl D-aspartate-associated protein 1 (glutamate binding) | up        |
| GRK5        | 2869        | G protein-coupled receptor kinase 5                                                           | down      |
| GSE1        | 23199       | Gse1 coiled-coil protein                                                                      | down      |
| GTF3C2      | 2976        | general transcription factor III C subunit 2                                                  | down      |
| <b>GYG1</b> | <b>2992</b> | <b>glycogenin 1</b>                                                                           | <b>up</b> |
| GZMA        | 3001        | granzyme A                                                                                    | down      |
| H2AFV       | 94239       | H2A histone family, member V                                                                  | down      |
| H2AFY       | 9555        | H2A histone family, member Y                                                                  | up        |
| H6PD        | 9563        | hexose-6-phosphate dehydrogenase (glucose 1-dehydrogenase)                                    | up        |
| HACL1       | 26061       | 2-hydroxyacyl-CoA lyase 1                                                                     | down      |
| HAUS4       | 54930       | HAUS augmin like complex subunit 4                                                            | up        |
| HDAC9       | 9734        | histone deacetylase 9                                                                         | down      |
| HES1        | 3280        | hes family bHLH transcription factor 1                                                        | up        |
| HGF         | 3082        | hepatocyte growth factor (hepapoietin A; scatter factor)                                      | up        |
| HHEX        | 3087        | hematopoietically expressed homeobox                                                          | up        |
| HIPK2       | 28996       | homeodomain interacting protein kinase 2                                                      | up        |
| HIST1H2BD   | 3017        | histone cluster 1, H2bd                                                                       | up        |
| HIST1H2BG   | 8339        | histone cluster 1, H2bg                                                                       | up        |
| HIVEP2      | 3097        | human immunodeficiency virus type I enhancer binding protein 2                                | down      |
| HK2         | 3099        | hexokinase 2                                                                                  | up        |
| HK3         | 3101        | hexokinase 3 (white cell)                                                                     | up        |
| HKR1        | 284459      | HKR1, GLI-Kruppel zinc finger family member                                                   | down      |
| HLA-DMA     | 3108        | major histocompatibility complex, class II, DM alpha                                          | down      |
| HLA-DMB     | 3109        | major histocompatibility complex, class II, DM beta                                           | down      |
| HLA-DOB     | 3112        | major histocompatibility complex, class II, DO beta                                           | down      |
| HLA-DQB1    | 3119        | major histocompatibility complex, class II, DQ beta 1                                         | down      |
| HLA-DRA     | 3122        | major histocompatibility complex, class II, DR alpha                                          | down      |

|          |        |                                                                              |      |
|----------|--------|------------------------------------------------------------------------------|------|
| HMGB2    | 3148   | high mobility group box 2                                                    | up   |
| HMGH4    | 10473  | high mobility group nucleosomal binding domain 4                             | down |
| HNRNPA0  | 10949  | heterogeneous nuclear ribonucleoprotein A0                                   | down |
| HNRNPA3  | 220988 | heterogeneous nuclear ribonucleoprotein A3                                   | down |
| HNRNPC   | 3183   | heterogeneous nuclear ribonucleoprotein C (C1/C2)                            | down |
| HNRNPDL  | 9987   | heterogeneous nuclear ribonucleoprotein D like                               | down |
| HNRNPH3  | 3189   | heterogeneous nuclear ribonucleoprotein H3 (2H9)                             | down |
| HNRNPR   | 10236  | heterogeneous nuclear ribonucleoprotein R                                    | down |
| HNRNPU   | 3192   | heterogeneous nuclear ribonucleoprotein U (scaffold attachment factor A)     | down |
| HNRNPUL2 | 221092 | heterogeneous nuclear ribonucleoprotein U-like 2                             | down |
| HP       | 3240   | haptoglobin                                                                  | up   |
| HP1BP3   | 50809  | heterochromatin protein 1, binding protein 3                                 | down |
| HPGD     | 3248   | hydroxyprostaglandin dehydrogenase 15-(NAD)                                  | up   |
| HRH2     | 3274   | histamine receptor H2                                                        | up   |
| HS1BP3   | 64342  | HCLS1 binding protein 3                                                      | up   |
| HSD3B7   | 80270  | hydroxy-delta-5-steroid dehydrogenase, 3 beta- and steroid delta-isomerase 7 | up   |
| HSH2D    | 84941  | hematopoietic SH2 domain containing                                          | down |
| HSPA1A   | 3303   | heat shock 70kDa protein 1A                                                  | up   |
| HSPD1    | 3329   | heat shock 60kDa protein 1 (chaperonin)                                      | down |
| HVCN1    | 84329  | hydrogen voltage gated channel 1                                             | down |
| IDNK     | 414328 | idnK, gluconokinase homolog (E. coli)                                        | up   |
| IER3     | 8870   | immediate early response 3                                                   | up   |
| IFIT1    | 3434   | interferon-induced protein with tetratricopeptide repeats 1                  | down |
| IFNGR2   | 3460   | interferon gamma receptor 2 (interferon gamma transducer 1)                  | up   |
| IGFBP7   | 3490   | insulin like growth factor binding protein 7                                 | up   |
| IL12RB1  | 3594   | interleukin 12 receptor, beta 1                                              | down |
| IL18R1   | 8809   | interleukin 18 receptor 1                                                    | up   |
| IL18RAP  | 8807   | interleukin 18 receptor accessory protein                                    | up   |
| IL1R1    | 3554   | interleukin 1 receptor, type I                                               | up   |
| IL1R2    | 7850   | interleukin 1 receptor, type II                                              | up   |
| IL4R     | 3566   | interleukin 4 receptor                                                       | up   |
| IL7R     | 3575   | interleukin 7 receptor                                                       | down |
| INHBA    | 3624   | inhibin beta A                                                               | up   |
| INPP4A   | 3631   | inositol polyphosphate-4-phosphatase type I A                                | down |
| IPO11    | 51194  | importin 11                                                                  | up   |

|          |        |                                                                        |      |
|----------|--------|------------------------------------------------------------------------|------|
| IRAK3    | 11213  | interleukin 1 receptor associated kinase 3                             | up   |
| IRS2     | 8660   | insulin receptor substrate 2                                           | up   |
| ISG20    | 3669   | interferon stimulated exonuclease gene 20kDa                           | down |
| ITGA4    | 3676   | integrin alpha 4                                                       | down |
| ITGA7    | 3679   | integrin alpha 7                                                       | up   |
| ITGAM    | 3684   | integrin, alpha M (complement component 3 receptor 3 subunit)          | up   |
| ITPKB    | 3707   | inositol-trisphosphate 3-kinase B                                      | down |
| ITPKC    | 80271  | inositol-trisphosphate 3-kinase C                                      | up   |
| ITPRIPL2 | 162073 | inositol 1,4,5-trisphosphate receptor interacting protein-like 2       | up   |
| ITSN1    | 6453   | intersectin 1                                                          | up   |
| JAG1     | 182    | jagged 1                                                               | up   |
| JAK1     | 3716   | Janus kinase 1                                                         | down |
| JAK2     | 3717   | Janus kinase 2                                                         | up   |
| KANSL2   | 54934  | KAT8 regulatory NSL complex subunit 2                                  | down |
| KCNE1    | 3753   | potassium channel, voltage gated subfamily E regulatory beta subunit 1 | up   |
| KCTD21   | 283219 | potassium channel tetramerization domain containing 21                 | up   |
| KDM2B    | 84678  | lysine (K)-specific demethylase 2B                                     | down |
| KHDRBS1  | 10657  | KH domain containing, RNA binding, signal transduction associated 1    | down |
| KIAA0355 | 9710   | KIAA0355                                                               | down |
| KIAA0930 | 23313  | KIAA0930                                                               | up   |
| KIAA1143 | 57456  | KIAA1143                                                               | down |
| KIAA1429 | 25962  | KIAA1429                                                               | down |
| KIAA1715 | 80856  | KIAA1715                                                               | up   |
| KIAA1958 | 158405 | KIAA1958                                                               | up   |
| KIF1B    | 23095  | kinesin family member 1B                                               | up   |
| KIF3C    | 3797   | kinesin family member 3C                                               | up   |
| KISS1R   | 84634  | KISS1 receptor                                                         | down |
| KIZ      | 55857  | kizuna centrosomal protein                                             | down |
| KLF14    | 136259 | Kruppel-like factor 14                                                 | up   |
| KLF7     | 8609   | Kruppel-like factor 7 (ubiquitous)                                     | up   |
| KLHL22   | 84861  | kelch-like family member 22                                            | down |
| KLRB1    | 3820   | killer cell lectin-like receptor subfamily B, member 1                 | down |
| KLRD1    | 3824   | killer cell lectin-like receptor subfamily D, member 1                 | down |
| KMT5A    | 387893 | lysine (K)-specific methyltransferase 5A                               | up   |
| KRBOX4   | 55634  | KRAB box domain containing 4                                           | down |

|              |           |                                                                                |      |
|--------------|-----------|--------------------------------------------------------------------------------|------|
| KRR1         | 11103     | KRR1, small subunit (SSU) processome component, homolog (yeast)                | down |
| LAIR1        | 3903      | leukocyte-associated immunoglobulin-like receptor 1                            | up   |
| LAMTOR1      | 55004     | late endosomal/lysosomal adaptor, MAPK and MTOR activator 1                    | up   |
| LAMTOR5      | 10542     | late endosomal/lysosomal adaptor, MAPK and MTOR activator 5                    | up   |
| LAPTM4B      | 55353     | lysosomal protein transmembrane 4 beta                                         | up   |
| LARS2        | 23395     | leucyl-tRNA synthetase 2, mitochondrial                                        | down |
| LATS2        | 26524     | large tumor suppressor kinase 2                                                | up   |
| LDHA         | 3939      | lactate dehydrogenase A                                                        | up   |
| LDLR         | 3949      | low density lipoprotein receptor                                               | up   |
| LEPROTL1     | 23484     | leptin receptor overlapping transcript-like 1                                  | down |
| LGALS1       | 3956      | lectin, galactoside-binding, soluble, 1                                        | up   |
| LGALS8       | 3964      | lectin, galactoside-binding, soluble, 8                                        | up   |
| LIG3         | 3980      | ligase III, DNA, ATP-dependent                                                 | down |
| LILRA5       | 353514    | leukocyte immunoglobulin-like receptor, subfamily A (with TM domain), member 5 | up   |
| LIN7A        | 8825      | lin-7 homolog A (C. elegans)                                                   | up   |
| LIPT1        | 51601     | lipoyltransferase 1                                                            | down |
| LMNB1        | 4001      | lamin B1                                                                       | up   |
| LOC100507507 | 100507507 | uncharacterized LOC100507507                                                   | up   |
| LOC728392    | 728392    | uncharacterized LOC728392                                                      | down |
| LRG1         | 116844    | leucine-rich alpha-2-glycoprotein 1                                            | up   |
| LRMP         | 4033      | lymphoid-restricted membrane protein                                           | down |
| LRPAP1       | 4043      | LDL receptor related protein associated protein 1                              | up   |
| LRRFIP2      | 9209      | leucine rich repeat (in FLII) interacting protein 2                            | up   |
| LRRN1        | 57633     | leucine rich repeat neuronal 1                                                 | up   |
| LTA4H        | 4048      | leukotriene A4 hydrolase                                                       | up   |
| LTB4R        | 1241      | leukotriene B4 receptor                                                        | up   |
| LUC7L3       | 51747     | LUC7-like 3 pre-mRNA splicing factor                                           | down |
| LYRM4        | 57128     | LYR motif containing 4                                                         | down |
| LYRM7        | 90624     | LYR motif containing 7                                                         | down |
| LYSMD2       | 256586    | LysM, putative peptidoglycan-binding, domain containing 2                      | down |
| LZTFL1       | 54585     | leucine zipper transcription factor like 1                                     | down |
| MAFB         | 9935      | v-maf avian musculoaponeurotic fibrosarcoma oncogene homolog B                 | up   |
| MAFG         | 4097      | v-maf avian musculoaponeurotic fibrosarcoma oncogene homolog G                 | up   |
| MAML2        | 84441     | mastermind-like transcriptional coactivator 2                                  | down |
| MAN2A1       | 4124      | mannosidase, alpha, class 2A, member 1                                         | down |

|          |        |                                                                            |      |
|----------|--------|----------------------------------------------------------------------------|------|
| MAN2A2   | 4122   | mannosidase, alpha, class 2A, member 2                                     | up   |
| MAOA     | 4128   | monoamine oxidase A                                                        | up   |
| MAP1LC3B | 81631  | microtubule-associated protein 1 light chain 3 beta                        | up   |
| MAP2K6   | 5608   | mitogen-activated protein kinase kinase 6                                  | up   |
| MAP7     | 9053   | microtubule-associated protein 7                                           | down |
| MAPK14   | 1432   | mitogen-activated protein kinase 14                                        | up   |
| MAPK8    | 5599   | mitogen-activated protein kinase 8                                         | down |
| MAPKAPK2 | 9261   | mitogen-activated protein kinase-activated protein kinase 2                | up   |
| MARC1    | 64757  | mitochondrial amidoxime reducing component 1                               | up   |
| MBD1     | 4152   | methyl-CpG binding domain protein 1                                        | down |
| MCEMP1   | 199675 | mast cell-expressed membrane protein 1                                     | up   |
| MCTP1    | 79772  | multiple C2 domains, transmembrane 1                                       | up   |
| MCTP2    | 55784  | multiple C2 domains, transmembrane 2                                       | up   |
| MDM4     | 4194   | MDM4, p53 regulator                                                        | down |
| MEF2A    | 4205   | myocyte enhancer factor 2A                                                 | up   |
| MEF2C    | 4208   | myocyte enhancer factor 2C                                                 | down |
| MEGF6    | 1953   | multiple EGF-like-domains 6                                                | down |
| METRNL   | 284207 | meteorin, glial cell differentiation regulator-like                        | up   |
| METTL21A | 151194 | methyltransferase like 21A                                                 | down |
| METTL22  | 79091  | methyltransferase like 22                                                  | up   |
| METTL3   | 56339  | methyltransferase like 3                                                   | down |
| METTL9   | 51108  | methyltransferase like 9                                                   | up   |
| MFN2     | 9927   | mitofusin 2                                                                | up   |
| MFNG     | 4242   | MFNG O-fucosylpeptide 3-beta-N-acetylglucosaminyltransferase               | down |
| MFSD12   | 126321 | major facilitator superfamily domain containing 12                         | down |
| MFSD13A  | 79847  | major facilitator superfamily domain containing 13A                        | up   |
| MGEA5    | 10724  | meningioma expressed antigen 5 (hyaluronidase)                             | down |
| MGST1    | 4257   | microsomal glutathione S-transferase 1                                     | up   |
| MICAL1   | 64780  | microtubule associated monooxygenase, calponin and LIM domain containing 1 | up   |
| MKNK1    | 8569   | MAP kinase interacting serine/threonine kinase 1                           | up   |
| MLX      | 6945   | MLX, MAX dimerization protein                                              | up   |
| MMP8     | 4317   | matrix metalloproteinase 8                                                 | up   |
| MMP9     | 4318   | matrix metalloproteinase 9                                                 | up   |
| MPEG1    | 219972 | macrophage expressed 1                                                     | down |
| MPHOSPH8 | 54737  | M-phase phosphoprotein 8                                                   | down |

|          |        |                                                                                                 |      |
|----------|--------|-------------------------------------------------------------------------------------------------|------|
| MPP7     | 143098 | membrane protein, palmitoylated 7                                                               | up   |
| MPRIIP   | 23164  | myosin phosphatase Rho interacting protein                                                      | down |
| MRFAP1L1 | 114932 | Morf4 family associated protein 1-like 1                                                        | down |
| MRPS25   | 64432  | mitochondrial ribosomal protein S25                                                             | down |
| MS4A6A   | 64231  | membrane-spanning 4-domains, subfamily A, member 6A                                             | up   |
| MSL3     | 10943  | male-specific lethal 3 homolog (Drosophila)                                                     | up   |
| MSTO1    | 55154  | misato 1, mitochondrial distribution and morphology regulator                                   | down |
| MTERF2   | 80298  | mitochondrial transcription termination factor 2                                                | down |
| MTERF4   | 130916 | mitochondrial transcription termination factor 4                                                | down |
| MTF1     | 4520   | metal-regulatory transcription factor 1                                                         | up   |
| MTHFD2   | 10797  | methylenetetrahydrofolate dehydrogenase (NADP+ dependent) 2, methenyltetrahydrofolate cyclohydr | up   |
| MTX1     | 4580   | metaxin 1                                                                                       | up   |
| MYCBP2   | 23077  | MYC binding protein 2, E3 ubiquitin protein ligase                                              | down |
| MYCL     | 4610   | v-myc avian myelocytomatosis viral oncogene lung carcinoma derived homolog                      | down |
| MYD88    | 4615   | myeloid differentiation primary response 88                                                     | up   |
| MYL12A   | 10627  | myosin light chain 12A                                                                          | up   |
| MYO10    | 4651   | myosin X                                                                                        | up   |
| MZF1     | 7593   | myeloid zinc finger 1                                                                           | down |
| N4BP2L1  | 90634  | NEDD4 binding protein 2-like 1                                                                  | down |
| NAA40    | 79829  | N(alpha)-acetyltransferase 40, NatD catalytic subunit                                           | down |
| NAIP     | 4671   | NLR family, apoptosis inhibitory protein                                                        | up   |
| NANS     | 54187  | N-acetylneuraminic acid synthase                                                                | up   |
| NAPRT    | 93100  | nicotinate phosphoribosyltransferase                                                            | up   |
| NATD1    | 256302 | N-acetyltransferase domain containing 1                                                         | up   |
| NCBP2    | 22916  | nuclear cap binding protein subunit 2                                                           | down |
| NCL      | 4691   | nucleolin                                                                                       | down |
| NDUFAF1  | 51103  | NADH dehydrogenase (ubiquinone) complex I, assembly factor 1                                    | up   |
| NEK6     | 10783  | NIMA-related kinase 6                                                                           | up   |
| NFATC2IP | 84901  | nuclear factor of activated T-cells, cytoplasmic, calcineurin-dependent 2 interacting protein   | down |
| NFATC3   | 4775   | nuclear factor of activated T-cells, cytoplasmic, calcineurin-dependent 3                       | down |
| NFE2     | 4778   | nuclear factor, erythroid 2                                                                     | up   |
| NFIL3    | 4783   | nuclear factor, interleukin 3 regulated                                                         | up   |
| NFKBIA   | 4792   | nuclear factor of kappa light polypeptide gene enhancer in B-cells inhibitor, alpha             | up   |
| NFKBIZ   | 64332  | nuclear factor of kappa light polypeptide gene enhancer in B-cells inhibitor, zeta              | up   |
| NFX1     | 4799   | nuclear transcription factor, X-box binding 1                                                   | down |

|         |        |                                                                      |      |
|---------|--------|----------------------------------------------------------------------|------|
| NKTR    | 4820   | natural killer cell triggering receptor                              | down |
| NLRC4   | 58484  | NLR family, CARD domain containing 4                                 | up   |
| NLRP1   | 22861  | NLR family, pyrin domain containing 1                                | down |
| NME8    | 51314  | NME/NM23 family member 8                                             | up   |
| NMRK1   | 54981  | nicotinamide riboside kinase 1                                       | up   |
| NONO    | 4841   | non-POU domain containing, octamer-binding                           | down |
| NOP10   | 55505  | NOP10 ribonucleoprotein                                              | up   |
| NOV     | 4856   | nephroblastoma overexpressed                                         | down |
| NQO2    | 4835   | NAD(P)H dehydrogenase, quinone 2                                     | up   |
| NSUN7   | 79730  | NOP2/Sun domain family, member 7                                     | up   |
| NT5DC1  | 221294 | 5'-nucleotidase domain containing 1                                  | down |
| NUB1    | 51667  | negative regulator of ubiquitin-like proteins 1                      | down |
| NUP160  | 23279  | nucleoporin 160kDa                                                   | down |
| NUP93   | 9688   | nucleoporin 93kDa                                                    | down |
| OGFRL1  | 79627  | opioid growth factor receptor-like 1                                 | down |
| OLAH    | 55301  | oleoyl-ACP hydrolase                                                 | up   |
| OPLAH   | 26873  | 5-oxoprolinase (ATP-hydrolysing)                                     | up   |
| ORM1    | 5004   | orosomucoid 1                                                        | up   |
| ORMDL3  | 94103  | ORMDL sphingolipid biosynthesis regulator 3                          | down |
| OSCAR   | 126014 | osteoclast associated, immunoglobulin-like receptor                  | up   |
| OXSRI   | 9943   | oxidative stress responsive 1                                        | up   |
| P2RY10  | 27334  | purinergic receptor P2Y, G-protein coupled, 10                       | down |
| PAG1    | 55824  | phosphoprotein membrane anchor with glycosphingolipid microdomains 1 | up   |
| PAM     | 5066   | peptidylglycine alpha-amidating monooxygenase                        | up   |
| PAPSS2  | 9060   | 3'-phosphoadenosine 5'-phosphosulfate synthase 2                     | up   |
| PATZ1   | 23598  | POZ (BTB) and AT hook containing zinc finger 1                       | down |
| PBXIP1  | 57326  | pre-B-cell leukemia homeobox interacting protein 1                   | down |
| PCGF5   | 84333  | polycomb group ring finger 5                                         | down |
| PCMT1   | 5110   | protein-L-isoaspartate (D-aspartate) O-methyltransferase             | up   |
| PCOLCE2 | 26577  | procollagen C-endopeptidase enhancer 2                               | up   |
| PCSK7   | 9159   | proprotein convertase subtilisin/kexin type 7                        | down |
| PDCD4   | 27250  | programmed cell death 4 (neoplastic transformation inhibitor)        | down |
| PDE4B   | 5142   | phosphodiesterase 4B, cAMP-specific                                  | down |
| PDE4D   | 5144   | phosphodiesterase 4D, cAMP-specific                                  | up   |
| PDGFC   | 56034  | platelet derived growth factor C                                     | up   |

|         |        |                                                                        |      |
|---------|--------|------------------------------------------------------------------------|------|
| PDLIM7  | 9260   | PDZ and LIM domain 7 (enigma)                                          | up   |
| PECR    | 55825  | peroxisomal trans-2-enoyl-CoA reductase                                | up   |
| PER1    | 5187   | period circadian clock 1                                               | up   |
| PFKFB2  | 5208   | 6-phosphofructo-2-kinase/fructose-2,6-biphosphatase 2                  | up   |
| PFKFB3  | 5209   | 6-phosphofructo-2-kinase/fructose-2,6-biphosphatase 3                  | up   |
| PGAP3   | 93210  | post-GPI attachment to proteins 3                                      | down |
| PGD     | 5226   | phosphogluconate dehydrogenase                                         | up   |
| PGK1    | 5230   | phosphoglycerate kinase 1                                              | up   |
| PGLYRP1 | 8993   | peptidoglycan recognition protein 1                                    | up   |
| PGM1    | 5236   | phosphoglucomutase 1                                                   | up   |
| PGS1    | 9489   | phosphatidylglycerophosphate synthase 1                                | up   |
| PHACTR2 | 9749   | phosphatase and actin regulator 2                                      | up   |
| PHB     | 5245   | prohibitin                                                             | down |
| PHF1    | 5252   | PHD finger protein 1                                                   | down |
| PHF20   | 51230  | PHD finger protein 20                                                  | down |
| PHF21A  | 51317  | PHD finger protein 21A                                                 | up   |
| PHKA2   | 5256   | phosphorylase kinase, alpha 2 (liver)                                  | up   |
| PHTF1   | 10745  | putative homeodomain transcription factor 1                            | up   |
| PI4KA   | 5297   | phosphatidylinositol 4-kinase, catalytic, alpha                        | down |
| PIK3C3  | 5289   | phosphatidylinositol 3-kinase, catalytic subunit type 3                | down |
| PIK3CB  | 5291   | phosphatidylinositol-4,5-bisphosphate 3-kinase, catalytic subunit beta | up   |
| PIM2    | 11040  | Pim-2 proto-oncogene, serine/threonine kinase                          | down |
| PIM3    | 415116 | Pim-3 proto-oncogene, serine/threonine kinase                          | up   |
| PITPNB  | 23760  | phosphatidylinositol transfer protein, beta                            | down |
| PIWIL4  | 143689 | piwi-like RNA-mediated gene silencing 4                                | up   |
| PKM     | 5315   | pyruvate kinase, muscle                                                | up   |
| PLA2G4A | 5321   | phospholipase A2, group IVA (cytosolic, calcium-dependent)             | up   |
| PLB1    | 151056 | phospholipase B1                                                       | up   |
| PLIN3   | 10226  | perilipin 3                                                            | up   |
| PLIN5   | 440503 | perilipin 5                                                            | up   |
| PLOD1   | 5351   | procollagen-lysine, 2-oxoglutarate 5-dioxygenase 1                     | up   |
| PLP2    | 5355   | proteolipid protein 2 (colonic epithelium-enriched)                    | up   |
| PNISR   | 25957  | PNN-interacting serine/arginine-rich protein                           | down |
| PNPLA6  | 10908  | patatin-like phospholipase domain containing 6                         | up   |
| POLH    | 5429   | polymerase (DNA directed), eta                                         | down |



|         |        |                                                              |      |
|---------|--------|--------------------------------------------------------------|------|
| POLR2D  | 5433   | polymerase (RNA) II (DNA directed) polypeptide D             | down |
| POR     | 5447   | P450 (cytochrome) oxidoreductase                             | up   |
| PPARD   | 5467   | peroxisome proliferator-activated receptor delta             | down |
| PPHLN1  | 51535  | periphilin 1                                                 | down |
| PPP1R2  | 5504   | protein phosphatase 1, regulatory (inhibitor) subunit 2      | down |
| PPP1R3D | 5509   | protein phosphatase 1, regulatory subunit 3D                 | up   |
| PPP1R3E | 90673  | protein phosphatase 1, regulatory subunit 3E                 | down |
| PPP1R8  | 5511   | protein phosphatase 1, regulatory subunit 8                  | down |
| PPP2R5C | 5527   | protein phosphatase 2, regulatory subunit B', gamma          | down |
| PPP6R2  | 9701   | protein phosphatase 6, regulatory subunit 2                  | down |
| PPTC7   | 160760 | PTC7 protein phosphatase homolog                             | down |
| PQLC1   | 80148  | PQ loop repeat containing 1                                  | up   |
| PQLC3   | 130814 | PQ loop repeat containing 3                                  | down |
| PRCP    | 5547   | prolylcarboxypeptidase                                       | up   |
| PRF1    | 5551   | perforin 1 (pore forming protein)                            | down |
| PRKAA1  | 5562   | protein kinase, AMP-activated, alpha 1 catalytic subunit     | up   |
| PRKACB  | 5567   | protein kinase, cAMP-dependent, catalytic, beta              | down |
| PRKAG2  | 51422  | protein kinase, AMP-activated, gamma 2 non-catalytic subunit | down |
| PRKD2   | 25865  | protein kinase D2                                            | down |
| PRKX    | 5613   | protein kinase, X-linked                                     | down |
| PRPF40A | 55660  | PRP40 pre-mRNA processing factor 40 homolog A                | down |
| PRR5L   | 79899  | proline rich 5 like                                          | down |
| PRRC2C  | 23215  | proline-rich coiled-coil 2C                                  | down |
| PRSS33  | 260429 | protease, serine, 33                                         | down |
| PRUNE2  | 158471 | prune homolog 2 (Drosophila)                                 | up   |
| PSMG4   | 389362 | proteasome (prosome, macropain) assembly chaperone 4         | down |
| PTGDR2  | 11251  | prostaglandin D2 receptor 2                                  | down |
| PTGR1   | 22949  | prostaglandin reductase 1                                    | up   |
| PTK2B   | 2185   | protein tyrosine kinase 2 beta                               | up   |
| PTMA    | 5757   | prothymosin, alpha                                           | down |
| PTTG1IP | 754    | pituitary tumor-transforming 1 interacting protein           | up   |
| PTX3    | 5806   | pentraxin 3, long                                            | up   |
| PUM2    | 23369  | pumilio RNA binding family member 2                          | down |
| PXK     | 54899  | PX domain containing serine/threonine kinase                 | up   |
| PYGL    | 5836   | phosphorylase, glycogen, liver                               | up   |

|          |        |                                                            |      |
|----------|--------|------------------------------------------------------------|------|
| QSOX1    | 5768   | quiescin Q6 sulfhydryl oxidase 1                           | up   |
| RAB20    | 55647  | RAB20, member RAS oncogene family                          | up   |
| RAB22A   | 57403  | RAB22A, member RAS oncogene family                         | down |
| RAB27A   | 5873   | RAB27A, member RAS oncogene family                         | up   |
| RAB31    | 11031  | RAB31, member RAS oncogene family                          | up   |
| RAB32    | 10981  | RAB32, member RAS oncogene family                          | up   |
| RAB7A    | 7879   | RAB7A, member RAS oncogene family                          | up   |
| RABGAP1L | 9910   | RAB GTPase activating protein 1-like                       | down |
| RABGEF1  | 27342  | RAB guanine nucleotide exchange factor (GEF) 1             | up   |
| RAD23B   | 5887   | RAD23 homolog B, nucleotide excision repair protein        | up   |
| RALGAPA2 | 57186  | Ral GTPase activating protein, alpha subunit 2 (catalytic) | up   |
| RANBP9   | 10048  | RAN binding protein 9                                      | up   |
| RARRES3  | 5920   | retinoic acid receptor responder (tazarotene induced) 3    | down |
| RASGEF1A | 221002 | RasGEF domain family member 1A                             | up   |
| RASSF5   | 83593  | Ras association (RalGDS/AF-6) domain family member 5       | down |
| RBBP6    | 5930   | retinoblastoma binding protein 6                           | down |
| RBM12    | 10137  | RNA binding motif protein 12                               | down |
| RBM15    | 64783  | RNA binding motif protein 15                               | down |
| RBM25    | 58517  | RNA binding motif protein 25                               | down |
| RBM26    | 64062  | RNA binding motif protein 26                               | down |
| RBM27    | 54439  | RNA binding motif protein 27                               | down |
| RBM4     | 5936   | RNA binding motif protein 4                                | down |
| RBM4B    | 83759  | RNA binding motif protein 4B                               | down |
| RBM8A    | 9939   | RNA binding motif protein 8A                               | down |
| RBMS1    | 5937   | RNA binding motif, single stranded interacting protein 1   | up   |
| RECK     | 8434   | reversion-inducing-cysteine-rich protein with kazal motifs | down |
| REPIN1   | 29803  | replication initiator 1                                    | down |
| RETN     | 56729  | resistin                                                   | up   |
| RFT1     | 91869  | RFT1 homolog                                               | up   |
| RGL4     | 266747 | ral guanine nucleotide dissociation stimulator-like 4      | up   |
| RGPD5    | 84220  | RANBP2-like and GRIP domain containing 5                   | down |
| RHOBTB3  | 22836  | Rho-related BTB domain containing 3                        | down |
| RHOU     | 58480  | ras homolog family member U                                | up   |
| RICTOR   | 253260 | RPTOR independent companion of MTOR, complex 2             | down |
| RIN3     | 79890  | Ras and Rab interactor 3                                   | up   |

|           |        |                                                                              |      |
|-----------|--------|------------------------------------------------------------------------------|------|
| RIOK3     | 8780   | RIO kinase 3                                                                 | up   |
| RNASEH1   | 246243 | ribonuclease H1                                                              | down |
| RNASEH2B  | 79621  | ribonuclease H2, subunit B                                                   | down |
| RNF10     | 9921   | ring finger protein 10                                                       | up   |
| RNF4      | 6047   | ring finger protein 4                                                        | down |
| ROGDI     | 79641  | rogdi homolog                                                                | up   |
| ROPN1L    | 83853  | rhophilin associated tail protein 1-like                                     | up   |
| RPA1      | 6117   | replication protein A1                                                       | down |
| RPAP3     | 79657  | RNA polymerase II associated protein 3                                       | down |
| RPS27A    | 6233   | ribosomal protein S27a                                                       | down |
| RPS6KA5   | 9252   | ribosomal protein S6 kinase, 90kDa, polypeptide 5                            | down |
| RRAGD     | 58528  | Ras-related GTP binding D                                                    | up   |
| RSBN1     | 54665  | round spermatid basic protein 1                                              | up   |
| RTN4      | 57142  | reticulon 4                                                                  | up   |
| RUNX2     | 860    | runt-related transcription factor 2                                          | down |
| S100A12   | 6283   | S100 calcium binding protein A12                                             | up   |
| S100A6    | 6277   | S100 calcium binding protein A6                                              | up   |
| S100A9    | 6280   | S100 calcium binding protein A9                                              | up   |
| SAMSN1    | 64092  | SAM domain, SH3 domain and nuclear localization signals 1                    | up   |
| SAP30     | 8819   | Sin3A associated protein 30kDa                                               | up   |
| SAP30L    | 79685  | SAP30-like                                                                   | up   |
| SARAF     | 51669  | store-operated calcium entry-associated regulatory factor                    | down |
| SART3     | 9733   | squamous cell carcinoma antigen recognized by T-cells 3                      | down |
| SCAF11    | 9169   | SR-related CTD-associated factor 11                                          | down |
| SCPEP1    | 59342  | serine carboxypeptidase 1                                                    | up   |
| SDHC      | 6391   | succinate dehydrogenase complex, subunit C, integral membrane protein, 15kDa | up   |
| SENP6     | 26054  | SUMO1/sentrin specific peptidase 6                                           | down |
| SEPT9     | 10801  | septin 9                                                                     | down |
| SERF1A    | 8293   | small EDRK-rich factor 1A (telomeric)                                        | down |
| SERPINB1  | 1992   | serpin peptidase inhibitor, clade B (ovalbumin), member 1                    | up   |
| SERPINB10 | 5273   | serpin peptidase inhibitor, clade B (ovalbumin), member 10                   | up   |
| SERPINB8  | 5271   | serpin peptidase inhibitor, clade B (ovalbumin), member 8                    | up   |
| SESN2     | 83667  | sestrin 2                                                                    | up   |
| SET       | 6418   | SET nuclear proto-oncogene                                                   | down |
| SETD6     | 79918  | SET domain containing 6                                                      | down |

|          |        |                                                                                                   |      |
|----------|--------|---------------------------------------------------------------------------------------------------|------|
| SFI1     | 9814   | SFI1 centrin binding protein                                                                      | down |
| SGK1     | 6446   | serum/glucocorticoid regulated kinase 1                                                           | down |
| SGMS2    | 166929 | sphingomyelin synthase 2                                                                          | up   |
| SGTB     | 54557  | small glutamine-rich tetratricopeptide repeat (TPR)-containing, beta                              | up   |
| SH3GLB1  | 51100  | SH3-domain GRB2-like endophilin B1                                                                | up   |
| SIGLEC5  | 8778   | sialic acid binding Ig-like lectin 5                                                              | up   |
| SIGLEC9  | 27180  | sialic acid binding Ig-like lectin 9                                                              | up   |
| SIPA1L2  | 57568  | signal-induced proliferation-associated 1 like 2                                                  | up   |
| SKIV2L2  | 23517  | superkiller viralicidic activity 2-like 2 ( <i>S. cerevisiae</i> )                                | down |
| SLC11A1  | 6556   | solute carrier family 11 (proton-coupled divalent metal ion transporter), member 1                | up   |
| SLC16A3  | 9123   | solute carrier family 16 (monocarboxylate transporter), member 3                                  | up   |
| SLC16A6  | 9120   | solute carrier family 16, member 6                                                                | up   |
| SLC1A3   | 6507   | solute carrier family 1 (glial high affinity glutamate transporter), member 3                     | up   |
| SLC22A4  | 6583   | solute carrier family 22 (organic cation/zwitterion transporter), member 4                        | up   |
| SLC23A2  | 9962   | solute carrier family 23 (ascorbic acid transporter), member 2                                    | down |
| SLC25A16 | 8034   | solute carrier family 25 (mitochondrial carrier), member 16                                       | down |
| SLC25A40 | 55972  | solute carrier family 25, member 40                                                               | up   |
| SLC26A8  | 116369 | solute carrier family 26 (anion exchanger), member 8                                              | up   |
| SLC2A3   | 6515   | solute carrier family 2 (facilitated glucose transporter), member 3                               | up   |
| SLC2A4RG | 56731  | SLC2A4 regulator                                                                                  | down |
| SLC30A1  | 7779   | solute carrier family 30 (zinc transporter), member 1                                             | up   |
| SLC36A1  | 206358 | solute carrier family 36 (proton/amino acid symporter), member 1                                  | up   |
| SLC37A3  | 84255  | solute carrier family 37, member 3                                                                | up   |
| SLC39A8  | 64116  | solute carrier family 39 (zinc transporter), member 8                                             | up   |
| SLC44A1  | 23446  | solute carrier family 44 (choline transporter), member 1                                          | up   |
| SLC5A3   | 6526   | solute carrier family 5 (sodium/myo-inositol cotransporter), member 3                             | down |
| SLC7A6   | 9057   | solute carrier family 7 (amino acid transporter light chain, y+L system), member 6                | down |
| SLC9A7   | 84679  | solute carrier family 9, subfamily A (NHE7, cation proton antiporter 7), member 7                 | down |
| SLCO3A1  | 28232  | solute carrier organic anion transporter family, member 3A1                                       | up   |
| SLX4IP   | 128710 | SLX4 interacting protein                                                                          | up   |
| SMAGP    | 57228  | small cell adhesion glycoprotein                                                                  | down |
| SMARCC1  | 6599   | SWI/SNF related, matrix associated, actin dependent regulator of chromatin, subfamily c, member 1 | down |
| SMARCD3  | 6604   | SWI/SNF related, matrix associated, actin dependent regulator of chromatin, subfamily d, member 3 | up   |
| SMPDL3A  | 10924  | sphingomyelin phosphodiesterase, acid-like 3A                                                     | up   |
| SMS      | 6611   | spermine synthase                                                                                 | down |

|            |        |                                                                                                     |      |
|------------|--------|-----------------------------------------------------------------------------------------------------|------|
| SMURF2     | 64750  | SMAD specific E3 ubiquitin protein ligase 2                                                         | down |
| SNAPC5     | 10302  | small nuclear RNA activating complex polypeptide 5                                                  | down |
| SNRNP200   | 23020  | small nuclear ribonucleoprotein, U5 200kDa subunit                                                  | down |
| SNTB2      | 6645   | syntrophin, beta 2 (dystrophin-associated protein A1, 59kDa, basic component 2)                     | up   |
| SNX3       | 8724   | sorting nexin 3                                                                                     | up   |
| SOCS3      | 9021   | suppressor of cytokine signaling 3                                                                  | up   |
| SON        | 6651   | SON DNA binding protein                                                                             | down |
| SP140      | 11262  | SP140 nuclear body protein                                                                          | down |
| SP140L     | 93349  | SP140 nuclear body protein-like                                                                     | down |
| SPCS2      | 9789   | signal peptidase complex subunit 2                                                                  | down |
| SPTLC2     | 9517   | serine palmitoyltransferase, long chain base subunit 2                                              | up   |
| SQRDL      | 58472  | sulfide quinone reductase-like (yeast)                                                              | up   |
| SRPK1      | 6732   | SRSF protein kinase 1                                                                               | up   |
| SRRM1      | 10250  | serine/arginine repetitive matrix 1                                                                 | down |
| SRRT       | 51593  | serrate, RNA effector molecule                                                                      | down |
| SRSF10     | 10772  | serine/arginine-rich splicing factor 10                                                             | down |
| SRSF5      | 6430   | serine/arginine-rich splicing factor 5                                                              | down |
| SSBP2      | 23635  | single-stranded DNA binding protein 2                                                               | down |
| SSBP3      | 23648  | single stranded DNA binding protein 3                                                               | down |
| SSH1       | 54434  | slingshot protein phosphatase 1                                                                     | up   |
| SSPN       | 8082   | sarcospan                                                                                           | down |
| SSR1       | 6745   | signal sequence receptor, alpha                                                                     | down |
| ST3GAL4    | 6484   | ST3 beta-galactoside alpha-2,3-sialyltransferase 4                                                  | up   |
| ST6GAL1    | 6480   | ST6 beta-galactosamide alpha-2,6-sialyltransferase 1                                                | down |
| ST6GALNAC3 | 256435 | ST6 (alpha-N-acetyl-neuraminyl-2,3-beta-galactosyl-1,3)-N-acetylgalactosaminide alpha-2,6-sialyltra | up   |
| STOM       | 2040   | stomatin                                                                                            | up   |
| STRAP      | 11171  | serine/threonine kinase receptor associated protein                                                 | down |
| STS        | 412    | steroid sulfatase (microsomal), isozyme S                                                           | up   |
| SULT1B1    | 27284  | sulfotransferase family 1B member 1                                                                 | up   |
| SUPT16H    | 11198  | SPT16 homolog, facilitates chromatin remodeling subunit                                             | down |
| SYN2       | 6854   | synapsin II                                                                                         | up   |
| SYNE1      | 23345  | spectrin repeat containing, nuclear envelope 1                                                      | up   |
| SYNE2      | 23224  | spectrin repeat containing, nuclear envelope 2                                                      | down |
| SYNRG      | 11276  | synergin, gamma                                                                                     | down |
| TAF1D      | 79101  | TATA box binding protein associated factor 1D                                                       | down |

|             |             |                                                                                  |      |
|-------------|-------------|----------------------------------------------------------------------------------|------|
| TAF3        | 83860       | TATA box binding protein associated factor 3                                     | down |
| TAF4        | 6874        | TAF4 RNA polymerase II, TATA box binding protein (TBP)-associated factor, 135kDa | down |
| TAGAP       | 117289      | T-cell activation RhoGTPase activating protein                                   | down |
| TARDBP      | 23435       | TAR DNA binding protein                                                          | down |
| TBC1D8      | 11138       | TBC1 domain family, member 8 (with GRAM domain)                                  | up   |
| TCAIM       | 285343      | T cell activation inhibitor, mitochondrial                                       | up   |
| TCF20       | 6942        | transcription factor 20 (AR1)                                                    | down |
| TCN1        | 6947        | transcobalamin I (vitamin B12 binding protein, R binder family)                  | up   |
| TCN2        | 6948        | transcobalamin II                                                                | up   |
| TCTN1       | 79600       | tectonic family member 1                                                         | down |
| TDRD9       | 122402      | tudor domain containing 9                                                        | up   |
| TERF1       | 7013        | telomeric repeat binding factor (NIMA-interacting) 1                             | down |
| TFB2M       | 64216       | transcription factor B2, mitochondrial                                           | down |
| TFDP1       | 7027        | transcription factor Dp-1                                                        | up   |
| TGFBR3      | 7049        | transforming growth factor beta receptor III                                     | down |
| TGIF2       | 60436       | TGFB-induced factor homeobox 2                                                   | down |
| TGS1        | 96764       | trimethylguanosine synthase 1                                                    | down |
| THADA       | 63892       | thyroid adenoma associated                                                       | down |
| TIGD3       | 220359      | tigger transposable element derived 3                                            | down |
| TIMP2       | 7077        | TIMP metalloproteinase inhibitor 2                                               | up   |
| TK2         | 7084        | thymidine kinase 2, mitochondrial                                                | up   |
| TLR2        | 7097        | toll-like receptor 2                                                             | up   |
| <b>TLR5</b> | <b>7100</b> | <b>toll-like receptor 5</b>                                                      | up   |
| TM2D3       | 80213       | TM2 domain containing 3                                                          | down |
| TMCO3       | 55002       | transmembrane and coiled-coil domains 3                                          | up   |
| TMED8       | 283578      | transmembrane p24 trafficking protein family member 8                            | up   |
| TMEM11      | 8834        | transmembrane protein 11                                                         | up   |
| TMEM110     | 375346      | transmembrane protein 110                                                        | up   |
| TMEM169     | 92691       | transmembrane protein 169                                                        | up   |
| TMEM185B    | 79134       | transmembrane protein 185B                                                       | up   |
| TMEM260     | 54916       | transmembrane protein 260                                                        | up   |
| TMEM33      | 55161       | transmembrane protein 33                                                         | up   |
| TMEM70      | 54968       | transmembrane protein 70                                                         | up   |
| TMLHE       | 55217       | trimethyllysine hydroxylase, epsilon                                             | up   |
| TNKS        | 8658        | tankyrase, TRF1-interacting ankyrin-related ADP-ribose polymerase                | down |

|          |        |                                                                    |      |
|----------|--------|--------------------------------------------------------------------|------|
| TNPO3    | 23534  | transportin 3                                                      | up   |
| TOLLIP   | 54472  | toll interacting protein                                           | up   |
| TOMM20   | 9804   | translocase of outer mitochondrial membrane 20 homolog (yeast)     | down |
| TOP2B    | 7155   | topoisomerase (DNA) II beta                                        | down |
| TOR4A    | 54863  | torsin family 4, member A                                          | up   |
| TP53     | 7157   | tumor protein p53                                                  | down |
| TP53BP1  | 7158   | tumor protein p53 binding protein 1                                | down |
| TP53I11  | 9537   | tumor protein p53 inducible protein 11                             | up   |
| TP53I3   | 9540   | tumor protein p53 inducible protein 3                              | up   |
| TPM4     | 7171   | tropomyosin 4                                                      | up   |
| TPR      | 7175   | translocated promoter region, nuclear basket protein               | down |
| TPST1    | 8460   | tyrosylprotein sulfotransferase 1                                  | up   |
| TPST2    | 8459   | tyrosylprotein sulfotransferase 2                                  | up   |
| TRA2A    | 29896  | transformer 2 alpha homolog (Drosophila)                           | down |
| TRABD    | 80305  | TraB domain containing                                             | up   |
| TRAF3IP2 | 10758  | TRAF3 interacting protein 2                                        | down |
| TRIM13   | 10206  | tripartite motif containing 13                                     | down |
| TRIQK    | 286144 | triple QxxK/R motif containing                                     | up   |
| TRPM2    | 7226   | transient receptor potential cation channel, subfamily M, member 2 | up   |
| TRPS1    | 7227   | trichorhinophalangeal syndrome I                                   | up   |
| TSPAN13  | 27075  | tetraspanin 13                                                     | down |
| TSPAN14  | 81619  | tetraspanin 14                                                     | up   |
| TSPO     | 706    | translocator protein (18kDa)                                       | up   |
| TSPYL1   | 7259   | TSPY-like 1                                                        | down |
| TTC17    | 55761  | tetratricopeptide repeat domain 17                                 | down |
| TTC22    | 55001  | tetratricopeptide repeat domain 22                                 | down |
| TUBB     | 203068 | tubulin, beta class I                                              | down |
| TWF1     | 5756   | twinfilin actin binding protein 1                                  | up   |
| TXN      | 7295   | thioredoxin                                                        | up   |
| TXNDC16  | 57544  | thioredoxin domain containing 16                                   | down |
| TYW1     | 55253  | tRNA-yW synthesizing protein 1 homolog ( <i>S. cerevisiae</i> )    | down |
| UBAP1    | 51271  | ubiquitin associated protein 1                                     | up   |
| UBE2F    | 140739 | ubiquitin-conjugating enzyme E2F (putative)                        | up   |
| UBE2H    | 7328   | ubiquitin conjugating enzyme E2H                                   | up   |
| UBE2J1   | 51465  | ubiquitin-conjugating enzyme E2, J1                                | up   |

|         |        |                                                                                                        |      |
|---------|--------|--------------------------------------------------------------------------------------------------------|------|
| UGCG    | 7357   | UDP-glucose ceramide glucosyltransferase                                                               | up   |
| UNC119B | 84747  | unc-119 lipid binding chaperone B                                                                      | down |
| UPP1    | 7378   | uridine phosphorylase 1                                                                                | up   |
| USB1    | 79650  | U6 snRNA biogenesis 1                                                                                  | up   |
| USPL1   | 10208  | ubiquitin specific peptidase like 1                                                                    | down |
| UTP23   | 84294  | UTP23, small subunit (SSU) processome component, homolog (yeast)                                       | down |
| UTP6    | 55813  | UTP6, small subunit (SSU) processome component, homolog (yeast)                                        | down |
| VAMP2   | 6844   | vesicle associated membrane protein 2                                                                  | down |
| VAPA    | 9218   | VAMP associated protein A                                                                              | up   |
| VAT1    | 10493  | vesicle amine transport 1                                                                              | up   |
| VIM     | 7431   | vimentin                                                                                               | up   |
| VNN1    | 8876   | vanin 1                                                                                                | up   |
| VPS35   | 55737  | VPS35 retromer complex component                                                                       | up   |
| VSTM1   | 284415 | V-set and transmembrane domain containing 1                                                            | up   |
| VWA5A   | 4013   | von Willebrand factor A domain containing 5A                                                           | up   |
| WBP11   | 51729  | WW domain binding protein 11                                                                           | down |
| WDR19   | 57728  | WD repeat domain 19                                                                                    | down |
| WDR73   | 84942  | WD repeat domain 73                                                                                    | down |
| WDR82   | 80335  | WD repeat domain 82                                                                                    | down |
| WHSC1L1 | 54904  | Wolf-Hirschhorn syndrome candidate 1-like 1                                                            | down |
| WIPF1   | 7456   | WAS/WASL interacting protein family, member 1                                                          | down |
| WIPI1   | 55062  | WD repeat domain, phosphoinositide interacting 1                                                       | up   |
| WSB1    | 26118  | WD repeat and SOCS box containing 1                                                                    | up   |
| XRCC5   | 7520   | X-ray repair complementing defective repair in Chinese hamster cells 5 (double-strand-break rejoining) | down |
| YIPF1   | 54432  | Yip1 domain family member 1                                                                            | up   |
| YOD1    | 55432  | YOD1 deubiquitinase                                                                                    | up   |
| YPEL1   | 29799  | yippee like 1                                                                                          | down |
| YTHDC1  | 91746  | YTH domain containing 1                                                                                | down |
| YWHAH   | 7533   | tyrosine 3-monooxygenase/tryptophan 5-monooxygenase activation protein, eta                            | up   |
| YY1     | 7528   | YY1 transcription factor                                                                               | down |
| ZAK     | 51776  | sterile alpha motif and leucine zipper containing kinase AZK                                           | up   |
| ZBED6CL | 113763 | ZBED6 C-terminal like                                                                                  | down |
| ZBTB4   | 57659  | zinc finger and BTB domain containing 4                                                                | down |
| ZBTB7B  | 51043  | zinc finger and BTB domain containing 7B                                                               | up   |
| ZCCHC7  | 84186  | zinc finger, CCHC domain containing 7                                                                  | down |



|         |        |                                      |      |
|---------|--------|--------------------------------------|------|
| ZDHHC19 | 131540 | zinc finger, DHHC-type containing 19 | up   |
| ZDHHC3  | 51304  | zinc finger, DHHC-type containing 3  | up   |
| ZEB1    | 6935   | zinc finger E-box binding homeobox 1 | down |
| ZEB2    | 9839   | zinc finger E-box binding homeobox 2 | up   |
| ZFAND5  | 7763   | zinc finger, AN1-type domain 5       | up   |
| ZFP36L2 | 678    | ZFP36 ring finger protein-like 2     | down |
| ZNF134  | 7693   | zinc finger protein 134              | down |
| ZNF14   | 7561   | zinc finger protein 14               | down |
| ZNF211  | 10520  | zinc finger protein 211              | down |
| ZNF224  | 7767   | zinc finger protein 224              | down |
| ZNF225  | 7768   | zinc finger protein 225              | down |
| ZNF226  | 7769   | zinc finger protein 226              | down |
| ZNF227  | 7770   | zinc finger protein 227              | down |
| ZNF263  | 10127  | zinc finger protein 263              | down |
| ZNF264  | 9422   | zinc finger protein 264              | down |
| ZNF274  | 10782  | zinc finger protein 274              | down |
| ZNF3    | 7551   | zinc finger protein 3                | down |
| ZNF319  | 57567  | zinc finger protein 319              | up   |
| ZNF329  | 79673  | zinc finger protein 329              | down |
| ZNF33A  | 7581   | zinc finger protein 33A              | down |
| ZNF366  | 167465 | zinc finger protein 366              | up   |
| ZNF383  | 163087 | zinc finger protein 383              | down |
| ZNF419  | 79744  | zinc finger protein 419              | down |
| ZNF438  | 220929 | zinc finger protein 438              | up   |
| ZNF544  | 27300  | zinc finger protein 544              | down |
| ZNF559  | 84527  | zinc finger protein 559              | down |
| ZNF561  | 93134  | zinc finger protein 561              | down |
| ZNF606  | 80095  | zinc finger protein 606              | down |
| ZNF638  | 27332  | zinc finger protein 638              | down |
| ZNF75A  | 7627   | zinc finger protein 75a              | down |
| ZNF764  | 92595  | zinc finger protein 764              | down |
| ZNF766  | 90321  | zinc finger protein 766              | down |
| ZNF787  | 126208 | zinc finger protein 787              | up   |
| ZNF791  | 163049 | zinc finger protein 791              | down |
| ZNF805  | 390980 | zinc finger protein 805              | down |

|         |        |                                           |      |
|---------|--------|-------------------------------------------|------|
| ZNF830  | 91603  | zinc finger protein 830                   | down |
| ZNF85   | 7639   | zinc finger protein 85                    | down |
| ZNF91   | 7644   | zinc finger protein 91                    | down |
| ZSCAN18 | 65982  | zinc finger and SCAN domain containing 18 | down |
| ZSCAN25 | 221785 | zinc finger and SCAN domain containing 25 | down |

| Mean Signal of Group Sepsis(GSE13904) | Mean Signal of Group Control(GSE13904) | Fold Change(GSE13904) | p-value(GSE13904) | FDR(GSE13904) |
|---------------------------------------|----------------------------------------|-----------------------|-------------------|---------------|
| 7.520664                              | 8.13324                                | -1.528987             | 0.012112          | 0.009809      |
| 7.620739                              | 7.115468                               | 1.419389              | 0.003611          | 0.001706      |
| 7.6439125                             | 7.2625665                              | 1.3059495             | 0.0202425         | 0.0280525     |
| 6.5819255                             | 5.378529833                            | 2.445297              | 0.001162667       | 0.000744333   |
| 7.239641                              | 6.291854                               | 1.9298255             | 0.0000505         | 0             |
| 3.734191                              | 4.225346                               | -1.40557              | 0.006592          | 0.001706      |
| 7.271232                              | 6.679820667                            | 1.507185333           | 0.005093667       | 0.006720667   |
| 7.896762                              | 7.507011                               | 1.310167              | 0.023305          | 0.036225      |
| 5.336329                              | 6.393428                               | -2.080744             | 0.000138          | 0             |
| 5.684702                              | 4.4210765                              | 2.478821              | 0.0002495         | 0             |
| 6.870742                              | 5.806455                               | 2.1488735             | 0.0000675         | 0             |
| 8.9474075                             | 7.0438195                              | 3.8260195             | 0.0000185         | 0             |
| 5.230758                              | 5.8793095                              | -1.574575             | 0.0002635         | 0             |
| 8.993976                              | 6.899734                               | 4.270018              | 0.00002           | 0             |
| 4.610588                              | 3.693496                               | 1.888305              | 0.002537          | 0.000703      |
| 6.910873                              | 7.436938                               | -1.439996             | 0.000142          | 0             |
| 7.279742                              | 6.094845                               | 2.48286525            | 0.0009845         | 0.0004265     |
| 7.611589                              | 7.147979                               | 1.378988              | 0.000406          | 0             |
| 8.333074                              | 7.074300333                            | 2.407761              | 3.56667E-05       | 0             |
| 7.800992                              | 6.449267                               | 2.552172              | 0.000904          | 0             |
| 7.363533333                           | 6.376634                               | 2.020456333           | 0.000363333       | 0             |
| 7.198056                              | 6.50801                                | 1.613336              | 0.000567          | 0             |
| 10.00045967                           | 9.453340667                            | 1.463495667           | 0.013943667       | 0.020190333   |
| 6.431511                              | 7.134919                               | -1.628347             | 0.000463          | 0             |
| 7.463927                              | 5.251892                               | 4.7121155             | 0.000029          | 0             |
| 6.833442                              | 7.226969                               | -1.3136               | 0.007532          | 0.004466      |
| 6.18495                               | 6.6645765                              | -1.394707             | 0.0162065         | 0.0148445     |
| 5.361446                              | 4.6129                                 | 1.6801                | 0.010216          | 0.009809      |
| 6.379941                              | 6.800062                               | -1.33804              | 0.004268          | 0.001706      |
| 9.013879                              | 9.413874                               | -1.319504             | 0.006485          | 0.001706      |
| 7.045649                              | 6.716949                               | 1.255881              | 0.023409          | 0.036225      |
| 7.286696                              | 7.728757                               | -1.358544             | 0.003763          | 0.000703      |
| 8.821449                              | 9.724462                               | -1.869967             | 0.000289          | 0             |

|             |             |             |             |             |
|-------------|-------------|-------------|-------------|-------------|
| 6.737948    | 5.667419    | 2.100204    | 0.000019    | 0           |
| 8.612117    | 7.785103    | 1.7747525   | 0.004158    | 0.002233    |
| 10.166528   | 6.467896    | 12.983718   | 0.000018    | 0           |
| 6.9968825   | 7.4457395   | -1.3670615  | 0.0036295   | 0.000994    |
| 7.1140375   | 6.416279    | 1.6229365   | 0.000382    | 0           |
| 8.639330286 | 7.735709714 | 1.893806571 | 0.000658857 | 0.000140714 |
| 6.256922    | 6.992877    | -1.6655     | 0.002424    | 0.000703    |
| 5.761108    | 4.189005    | 5.763238333 | 0.001906667 | 0.000803    |
| 5.419693    | 4.89051475  | 1.45056325  | 0.00685525  | 0.006513    |
| 6.522263    | 7.167874    | -1.564402   | 0.005286    | 0.001706    |
| 6.267492    | 6.7940185   | -1.4405255  | 0.0029055   | 0.000853    |
| 7.648819    | 6.797779    | 1.8038      | 0.001864    | 0.000703    |
| 7.55887     | 7.072233    | 1.401176    | 0.019263    | 0.036225    |
| 10.570718   | 9.975982    | 1.510195    | 0.002903    | 0.001706    |
| 5.985170833 | 5.508527333 | 1.4016075   | 0.006005667 | 0.005563833 |
| 9.969848    | 9.4938935   | 1.39518375  | 0.01870675  | 0.0280525   |
| 5.486566375 | 4.318557625 | 2.463023    | 0.00044175  | 0.000087875 |
| 6.48737     | 6.891881333 | -1.324481   | 0.015682    | 0.013347333 |
| 7.26186     | 6.721911    | 1.453921    | 0.001379    | 0.000282    |
| 6.70439     | 5.6517516   | 2.1094208   | 0.0001268   | 0           |
| 5.514812    | 5.067909    | 1.363111    | 0.017775    | 0.01988     |
| 6.945722    | 7.880671    | -1.911981   | 0.0004755   | 0           |
| 4.531184    | 5.0590685   | -1.454635   | 0.003073    | 0.000853    |
| 8.2282498   | 7.5639114   | 1.5984184   | 0.0008032   | 0.000197    |
| 7.070369    | 6.03806125  | 2.11801925  | 0.00409325  | 0.00497     |
| 5.61651     | 4.484531    | 2.191592    | 0.00068     | 0           |
| 6.133439    | 5.376529    | 1.7211265   | 0.0016285   | 0.0004925   |
| 5.84146     | 6.137999    | -1.228195   | 0.016967    | 0.009809    |
| 5.802323333 | 5.246503667 | 1.475975    | 0.009639333 | 0.013798    |
| 8.1690655   | 8.5814115   | -1.331938   | 0.010179    | 0.005256    |
| 8.100595    | 7.64195     | 1.374251    | 0.000469    | 0           |
| 5.8498985   | 4.69939325  | 2.44682725  | 0.0030345   | 0.00287875  |
| 9.50718525  | 7.907586    | 3.24148675  | 0.000577    | 0.00017575  |
| 6.772294333 | 7.539430667 | -1.714274   | 0.000466333 | 0           |
| 4.843904    | 5.3565265   | -1.438713   | 0.0158325   | 0.0181125   |

|             |             |             |             |            |
|-------------|-------------|-------------|-------------|------------|
| 6.385013    | 5.840384    | 1.458644    | 0.008983    | 0.009809   |
| 9.048426    | 8.337797    | 1.636518    | 0.00043     | 0          |
| 7.7008      | 5.455984    | 4.739767    | 0.000019    | 0          |
| 5.6873185   | 6.219293    | -1.4459495  | 0.007214    | 0.003086   |
| 8.9414305   | 8.275339    | 1.612603    | 0.000767    | 0.000141   |
| 4.495154    | 5.1722345   | -1.6308725  | 0.009601    | 0.00994    |
| 6.523962    | 7.111037    | -1.502198   | 0.002718    | 0.000703   |
| 7.5956725   | 8.232187    | -1.5822375  | 0.014105    | 0.0181125  |
| 7.115533    | 7.7455875   | -1.547765   | 0.0276745   | 0.023017   |
| 7.63439975  | 8.58213775  | -1.96495275 | 0.00334075  | 0.00129225 |
| 7.955849    | 8.77498     | -1.764343   | 0.000275    | 0          |
| 6.788807    | 6.523957    | 1.201511    | 0.020217    | 0.036225   |
| 9.902149    | 10.238672   | -1.262709   | 0.031078    | 0.036225   |
| 6.5719505   | 6.909121    | -1.263765   | 0.0233325   | 0.01988    |
| 7.516306    | 7.9238635   | -1.328692   | 0.0101235   | 0.0071375  |
| 9.880911    | 9.174967    | 1.631212    | 0.004326    | 0.001706   |
| 7.152984    | 7.704386    | -1.465509   | 0.007947    | 0.004466   |
| 6.634675    | 5.06523     | 2.967906    | 0.00011     | 0          |
| 6.93813     | 7.349712    | -1.330143   | 0.013178    | 0.009809   |
| 8.935739    | 7.106402    | 3.553738    | 0.000026    | 0          |
| 6.570211    | 5.751657    | 1.763637    | 0.011468    | 0.009809   |
| 5.862968    | 4.89472     | 1.991704    | 0.000139    | 0          |
| 7.700933    | 5.5958405   | 4.652427    | 0.0000235   | 0          |
| 6.931397    | 5.96547     | 1.953317    | 0.008006    | 0.009809   |
| 7.476265    | 7.928647    | -1.368298   | 0.024987    | 0.01988    |
| 7.806831    | 6.730469667 | 2.109560333 | 0.000227667 | 0          |
| 8.865475    | 7.84256     | 2.03202     | 0.000063    | 0          |
| 5.764804667 | 5.166282667 | 1.517476333 | 0.007354    | 0.008684   |
| 8.938577    | 7.316699    | 3.077756    | 0.000019    | 0          |
| 4.998889    | 5.572661    | -1.48841    | 0.035687    | 0.036225   |
| 8.720274    | 8.052988    | 1.588148    | 0.001675    | 0.0004925  |
| 6.004664    | 6.714236    | -1.635318   | 0.00235     | 0.000703   |
| 5.185406    | 4.632629    | 1.466907    | 0.001488    | 0.000282   |
| 7.911667    | 8.476752    | -1.479475   | 0.002604    | 0.000703   |
| 7.590283    | 6.758585    | 1.779779    | 0.000135    | 0          |

|             |             |              |             |             |
|-------------|-------------|--------------|-------------|-------------|
| 6.148274    | 6.812282    | -1.584478    | 0.000536    | 0           |
| 5.38879     | 6.092907    | -1.670708    | 0.006304    | 0.0049045   |
| 6.553435    | 7.180223    | -1.544124    | 0.000682    | 0           |
| 10.987742   | 10.576943   | 1.329422     | 0.012035    | 0.01988     |
| 7.812029    | 8.482059    | -1.591106    | 0.000362    | 0           |
| 5.599301    | 7.016176    | -2.670065    | 0.000215    | 0           |
| 7.454284333 | 5.548439333 | 3.804944667  | 0.000567333 | 0.000094    |
| 10.34229    | 6.011257    | 20.126612    | 0.000018    | 0           |
| 7.713811    | 8.160146    | -1.362575    | 0.024551    | 0.01988     |
| 7.682118333 | 8.421927    | -1.759317    | 0.008082333 | 0.006861    |
| 10.52411233 | 9.336753333 | 2.327815667  | 0.00173     | 0.001488667 |
| 10.735264   | 9.366746    | 2.582051     | 0.00002     | 0           |
| 7.6241505   | 7.0670355   | 1.471378     | 0.001845    | 0.000703    |
| 3.960795    | 4.951247    | -1.986807    | 0.000116    | 0           |
| 2.84535     | 2.55443     | 1.223421     | 0.023675    | 0.036225    |
| 9.287026    | 8.0021395   | 2.4451765    | 0.000052    | 0           |
| 10.32713    | 11.270569   | -1.923107    | 0.000037    | 0           |
| 5.817304    | 6.233152    | -1.3341005   | 0.0014465   | 0.000141    |
| 6.966486    | 5.731315    | 2.383168     | 0.000108    | 0           |
| 8.201105    | 6.978096    | 2.334331     | 0.00002     | 0           |
| 5.32022     | 5.630155    | -1.239652    | 0.015926    | 0.009809    |
| 7.19954     | 7.868416    | -1.589833    | 0.001347    | 0.000282    |
| 7.436547667 | 6.515325333 | 1.943278333  | 0.002013667 | 0.000662667 |
| 6.131618    | 6.535014    | -1.322618    | 0.014158    | 0.009809    |
| 5.760128    | 6.330803    | -1.485218    | 0.00362     | 0.000703    |
| 7.710004667 | 6.264840333 | 3.130885333  | 0.003397333 | 0.003269667 |
| 8.3152215   | 5.9800035   | 5.073979     | 0.000019    | 0           |
| 11.339255   | 10.801011   | 1.452205     | 0.00094     | 0           |
| 3.060761    | 3.647028    | -1.501358    | 0.000093    | 0           |
| 7.430166667 | 8.243421    | -1.793152333 | 0.009908    | 0.012075    |
| 9.5801025   | 10.2978635  | -1.6760245   | 0.007001    | 0.0049045   |
| 4.49378     | 4.903862    | -1.328803    | 0.007303    | 0.0025845   |
| 7.295857    | 6.4575895   | 1.788594     | 0.0000625   | 0           |
| 5.831035    | 6.172723    | -1.267238    | 0.01371     | 0.009809    |
| 5.641472    | 4.9216325   | 1.650123     | 0.001078    | 0.000141    |

|             |             |              |             |             |
|-------------|-------------|--------------|-------------|-------------|
| 7.760894833 | 6.414688333 | 2.670978167  | 0.002973    | 0.003313333 |
| 8.13248     | 8.607318    | -1.395232    | 0.0123635   | 0.00994     |
| 7.561451    | 8.4658765   | -1.8947745   | 0.000238    | 0           |
| 8.923251    | 9.300122    | -1.298522    | 0.039226    | 0.036225    |
| 6.802329    | 7.473903667 | -1.596436333 | 0.005944667 | 0.002291667 |
| 4.965652    | 4.495851    | 1.384918     | 0.025442    | 0.036225    |
| 7.847310333 | 7.075275667 | 1.708905333  | 0.013373667 | 0.019270333 |
| 8.405573    | 8.800187    | -1.314591    | 0.005503    | 0.001706    |
| 11.092035   | 9.182275    | 3.757466     | 0.000022    | 0           |
| 6.267022667 | 7.103684667 | -1.792582333 | 0.001113667 | 0.000234333 |
| 9.680058    | 8.8700804   | 1.7707       | 0.0004834   | 0           |
| 5.27316     | 5.688244    | -1.333376    | 0.002768    | 0.000703    |
| 7.4653      | 6.243428    | 2.332491     | 0.000048    | 0           |
| 5.6702335   | 6.362153    | -1.6154535   | 0.0008345   | 0           |
| 7.151016    | 7.502677    | -1.276029    | 0.012907    | 0.010793    |
| 5.378126    | 5.807291    | -1.3464725   | 0.0188465   | 0.0148445   |
| 6.739988    | 7.3422865   | -1.555579167 | 0.011749667 | 0.009987    |
| 7.96309725  | 5.98990175  | 4.4182015    | 0.00202975  | 0.00245225  |
| 6.097971    | 6.74364     | -1.564465    | 0.005358    | 0.001706    |
| 10.866394   | 8.54021     | 5.014769     | 0.000019    | 0           |
| 4.124501    | 3.615434    | 1.42313      | 0.0076355   | 0.0071375   |
| 6.765687    | 5.263736    | 2.832253     | 0.000363    | 0           |
| 6.361475667 | 4.839728    | 2.880038667  | 7.83333E-05 | 0           |
| 4.041406    | 4.540939    | -1.413756    | 0.00137     | 0.000282    |
| 4.720407    | 5.603639    | -1.844502    | 0.003082    | 0.000703    |
| 7.192054    | 7.534587    | -1.267981    | 0.017536    | 0.009809    |
| 8.356255    | 8.085171    | 1.206714     | 0.018881    | 0.036225    |
| 7.539632    | 6.758775667 | 1.721602333  | 0.000864    | 0.000234333 |
| 6.812792    | 5.809391    | 2.00472      | 0.00009     | 0           |
| 9.8292075   | 10.8379815  | -2.1786005   | 0.000389    | 0           |
| 6.9266095   | 7.626085    | -1.644586    | 0.00296475  | 0.00067275  |
| 7.0903165   | 7.626048    | -1.4564035   | 0.0042505   | 0.002233    |
| 7.350164    | 7.683864    | -1.261327    | 0.011354333 | 0.008209333 |
| 8.55788     | 9.2168885   | -1.5795645   | 0.0031495   | 0.000994    |
| 8.082286    | 8.924017    | -1.792199    | 0.000234    | 0           |

|             |             |             |             |             |
|-------------|-------------|-------------|-------------|-------------|
| 7.914965    | 6.871102    | 2.061741    | 0.000025    | 0           |
| 6.782835    | 5.999051    | 1.721641    | 0.000404    | 0           |
| 5.97612575  | 6.33536825  | -1.28632825 | 0.0151345   | 0.01396075  |
| 6.380647    | 5.3246885   | 2.0827635   | 0.0000435   | 0           |
| 6.9139515   | 7.5059675   | -1.5079285  | 0.0014545   | 0.000141    |
| 4.684002    | 4.04683     | 1.585122    | 0.003516    | 0.002233    |
| 3.211302    | 3.746485    | -1.449125   | 0.0003      | 0           |
| 6.859544    | 6.046123    | 1.757374    | 0.001449    | 0.000282    |
| 7.036811    | 6.5101235   | 1.4406365   | 0.010251    | 0.009809    |
| 7.39158     | 6.648069667 | 1.677294667 | 0.000312667 | 0           |
| 8.187621    | 7.413852    | 1.70973     | 0.000175    | 0           |
| 7.462305    | 7.79646     | -1.260638   | 0.013642    | 0.009809    |
| 6.2941465   | 6.668448    | -1.298923   | 0.0124415   | 0.00994     |
| 8.635575    | 7.4566075   | 2.3581385   | 0.0000455   | 0           |
| 7.429391    | 6.394642    | 2.048758    | 0.00072     | 0           |
| 6.84583375  | 5.54187525  | 2.56074275  | 0.00077875  | 0.00017575  |
| 8.332978    | 7.410653    | 1.895167    | 0.000268    | 0           |
| 6.51375125  | 7.74222475  | -2.386052   | 0.0028445   | 0.0011165   |
| 10.150101   | 7.811751    | 5.05724     | 0.000018    | 0           |
| 7.385988    | 5.974498    | 2.660118    | 0.000071    | 0           |
| 7.915863    | 8.268808    | -1.277165   | 0.008404    | 0.004466    |
| 8.953132    | 9.536563    | -1.498408   | 0.000389    | 0           |
| 10.779715   | 10.305645   | 1.389023    | 0.006731    | 0.004466    |
| 6.9457265   | 7.5859065   | -1.5625985  | 0.0083615   | 0.0049045   |
| 10.048133   | 10.993588   | -1.925797   | 0.000501    | 0           |
| 8.218133667 | 7.111624667 | 2.157086333 | 0.000200333 | 0           |
| 5.17383625  | 5.65421525  | -1.40053075 | 0.016393    | 0.016549    |
| 8.539643    | 8.921271    | -1.30281    | 0.032002    | 0.036225    |
| 6.406550667 | 5.429565667 | 2.07302     | 0.002060333 | 0.001488667 |
| 8.889389    | 7.983462    | 1.937216    | 0.0070995   | 0.010081    |
| 5.9896185   | 6.4083345   | -1.341551   | 0.002993    | 0.000853    |
| 5.818139    | 5.049006    | 1.704245    | 0.000815    | 0           |
| 5.734853    | 6.583294    | -1.800554   | 0.000074    | 0           |
| 4.774431    | 4.264914    | 1.423573    | 0.004896    | 0.004466    |
| 5.44534     | 4.979203    | 1.381405    | 0.007084    | 0.004466    |



|             |             |              |             |             |
|-------------|-------------|--------------|-------------|-------------|
| 6.552370667 | 7.215235333 | -1.604704667 | 0.013782333 | 0.009896333 |
| 6.077989    | 5.183702667 | 1.924874333  | 0.000362    | 0           |
| 6.261566667 | 5.426539333 | 1.804863667  | 0.001720667 | 0.000568667 |
| 7.322253    | 6.547111    | 1.730995333  | 0.00541     | 0.006626667 |
| 4.880047333 | 4.254180667 | 1.565982     | 0.013719667 | 0.018701667 |
| 7.087560667 | 5.616568333 | 2.809587     | 0.000366    | 0.000094    |
| 5.115616    | 4.605841    | 1.427384     | 0.001728    | 0.0004925   |
| 6.099914    | 5.432569333 | 1.588322667  | 0.006405667 | 0.006539333 |
| 4.8906905   | 4.3147825   | 1.493452     | 0.0007315   | 0.000141    |
| 7.504364    | 8.710318    | -2.306899    | 0.000122    | 0           |
| 5.62663     | 5.988512    | -1.2851      | 0.011656    | 0.009809    |
| 4.532813    | 4.210063    | 1.250712     | 0.008458    | 0.009809    |
| 7.400241    | 6.577331    | 1.76897      | 0.000031    | 0           |
| 5.089048    | 4.680052    | 1.327761     | 0.012661    | 0.01988     |
| 7.054721    | 6.458125667 | 1.514808333  | 0.00799     | 0.006633333 |
| 6.284448    | 6.928885    | -1.563129    | 0.017996    | 0.01988     |
| 5.207814    | 4.769865    | 1.354677     | 0.007284    | 0.004466    |
| 3.945019    | 4.735211    | -1.729305    | 0.000098    | 0           |
| 6.890709    | 5.787562    | 2.148228     | 0.000276    | 0           |
| 5.332445    | 5.955971    | -1.540635    | 0.000501    | 0           |
| 4.4047915   | 4.7448135   | -1.2662585   | 0.019172    | 0.0203455   |
| 6.15774     | 6.590149    | -1.349485    | 0.000188    | 0           |
| 4.315734    | 3.596736    | 1.646038     | 0.005774    | 0.004466    |
| 6.923821333 | 6.101320667 | 1.807323333  | 0.002944    | 0.003269667 |
| 4.007518    | 3.631374    | 1.297868     | 0.001637    | 0.000282    |
| 6.7671578   | 5.024488    | 3.736636     | 0.0000484   | 0           |
| 4.425142    | 7.888567    | -11.030491   | 0.000019    | 0           |
| 11.55346    | 9.882674    | 3.1924705    | 0.000019    | 0           |
| 6.857129    | 7.432726    | -1.490294    | 0.004092    | 0.000703    |
| 9.1689065   | 10.276105   | -2.1646415   | 0.000394    | 0           |
| 7.007478    | 6.261447    | 1.677172     | 0.000839    | 0           |
| 8.846381    | 8.236683    | 1.52594      | 0.00218     | 0.000703    |
| 5.392589    | 7.946174    | -5.870911    | 0.000019    | 0           |
| 6.868146667 | 6.032615667 | 1.785138333  | 0.00785     | 0.009990333 |
| 10.29339    | 10.874752   | -1.496261    | 0.016516    | 0.009809    |

|             |             |             |             |             |
|-------------|-------------|-------------|-------------|-------------|
| 10.419058   | 9.235027    | 2.272108    | 0.000028    | 0           |
| 5.206698    | 5.901673    | -1.618855   | 0.001111    | 0           |
| 9.223078667 | 7.410564    | 3.530244667 | 0.000117    | 0           |
| 5.626464    | 4.868595    | 1.690991    | 0.000099    | 0           |
| 8.406373    | 7.124297    | 2.5490415   | 0.00003225  | 0           |
| 9.083262    | 7.4786045   | 3.1105425   | 0.0000205   | 0           |
| 5.924648    | 5.143498    | 1.718499    | 0.002009    | 0.000703    |
| 5.6674165   | 6.679986    | -2.057604   | 0.0027475   | 0.000853    |
| 4.8307695   | 5.6165645   | -1.764507   | 0.009956    | 0.00994     |
| 4.786144    | 5.389751667 | -1.526381   | 0.001721333 | 0.000568667 |
| 6.064128    | 6.46283     | -1.318321   | 0.016147    | 0.009809    |
| 8.45938     | 6.791099    | 3.178357    | 0.00044     | 0           |
| 3.907865    | 3.30092     | 1.523031    | 0.000059    | 0           |
| 8.175655    | 8.569477    | -1.31387    | 0.00508     | 0.001706    |
| 7.7339218   | 8.3584362   | -1.5531386  | 0.0131718   | 0.0113616   |
| 4.552959    | 5.548749    | -1.994171   | 0.000597    | 0           |
| 7.7055325   | 8.386899    | -1.60639    | 0.0047685   | 0.002233    |
| 8.502615    | 6.651212    | 3.60851     | 0.000034    | 0           |
| 7.171899    | 5.658164    | 2.855482    | 0.000034    | 0           |
| 12.30209617 | 11.62423183 | 1.604544833 | 0.000973167 | 0.000141    |
| 8.4829378   | 6.6628838   | 3.5985112   | 0.0000188   | 0           |
| 6.439632    | 6.923183    | -1.398181   | 0.00434     | 0.001706    |
| 7.108365    | 6.146772    | 1.947459    | 0.000032    | 0           |
| 7.255505    | 8.323222    | -2.096113   | 0.000043    | 0           |
| 5.532439    | 5.221896    | 1.240175    | 0.005262    | 0.004466    |
| 5.109432    | 4.47096     | 1.55668     | 0.016023    | 0.01988     |
| 9.504319    | 10.081397   | -1.491825   | 0.0041      | 0.001706    |
| 4.499296    | 4.072281    | 1.344449    | 0.017784    | 0.01988     |
| 7.283959    | 6.660813    | 1.54023     | 0.001889    | 0.000703    |
| 11.147812   | 10.343146   | 1.746742    | 0.000087    | 0           |
| 6.492844    | 6.77394     | -1.215117   | 0.020064    | 0.01988     |
| 7.7975215   | 10.153928   | -5.124914   | 0.0000195   | 0           |
| 6.879064    | 7.232894    | -1.277949   | 0.012036    | 0.009809    |
| 4.952634    | 5.37264     | -1.337934   | 0.013497    | 0.009809    |
| 5.351906    | 6.220125    | -1.825408   | 0.000087    | 0           |

|                  |                 |                |                  |             |
|------------------|-----------------|----------------|------------------|-------------|
| 7.033072         | 7.405828        | -1.294824      | 0.005243         | 0.001706    |
| 6.493779         | 7.010842        | -1.431039      | 0.0208           | 0.01988     |
| 8.749466         | 7.775812        | 1.963808       | 0.001027         | 0.000282    |
| 7.276368         | 9.229668        | -3.872595      | 0.000018         | 0           |
| 7.898117         | 5.053614        | 7.182584       | 0.000019         | 0           |
| 7.373332         | 6.5248435       | 1.8010515      | 0.0002185        | 0           |
| 3.451393         | 4.305997        | -1.808263      | 0.000418         | 0           |
| 6.48548075       | 4.9603115       | 3.00578275     | 0.000049         | 0           |
| 8.423425         | 7.566163        | 1.811597       | 0.000229         | 0           |
| 6.439205         | 7.021435        | -1.497162      | 0.008809         | 0.004466    |
| 6.134539         | 6.743614        | -1.527048      | 0.0047565        | 0.002233    |
| 7.6982075        | 8.027771        | -1.256816      | 0.0129855        | 0.012173    |
| <b>10.605027</b> | <b>8.186451</b> | <b>5.35319</b> | <b>0.0000185</b> | <b>0</b>    |
| 7.175937         | 9.324389        | -4.433518      | 0.000025         | 0           |
| 7.005544667      | 7.496774667     | -1.416032333   | 0.011618333      | 0.012169    |
| 8.5476005        | 7.858899        | 1.624256       | 0.0054315        | 0.00633275  |
| 6.964501         | 6.361164        | 1.519226       | 0.000463         | 0           |
| 6.317603         | 6.999498        | -1.604246      | 0.0002           | 0           |
| 8.777087         | 7.649067        | 2.185585       | 0.000044         | 0           |
| 5.5443275        | 6.2555735       | -1.6520185     | 0.000769         | 0.000141    |
| 3.401446         | 3.133698        | 1.203927       | 0.010363         | 0.009809    |
| 5.0372438        | 4.0367484       | 2.1444766      | 0.0010318        | 0.0003976   |
| 8.348748         | 7.799138        | 1.46369        | 0.015705         | 0.01988     |
| 6.779896333      | 6.199037333     | 1.502048333    | 0.014327667      | 0.019270333 |
| 8.5306745        | 7.3773085       | 2.2361985      | 0.0002835        | 0           |
| 5.9318575        | 5.1886235       | 1.6877815      | 0.0100455        | 0.010793    |
| 5.9550215        | 6.535058        | -1.496483      | 0.0037825        | 0.000994    |
| 7.572717         | 6.616088        | 1.94077        | 0.000029         | 0           |
| 9.903487         | 7.722515        | 4.53459        | 0.000018         | 0           |
| 5.541707         | 6.052624        | -1.424956      | 0.001774         | 0.000282    |
| 8.444853         | 9.259117        | -1.7584        | 0.001432         | 0.000282    |
| 7.596509         | 8.547314        | -1.93295       | 0.000119         | 0           |
| 7.699412         | 8.504015        | -1.746665      | 0.000854         | 0           |
| 7.9668005        | 8.7541255       | -1.725938      | 0.0039505        | 0.0012045   |
| 10.9558705       | 11.7024215      | -1.677925      | 0.0017575        | 0.000282    |

|             |             |              |             |             |
|-------------|-------------|--------------|-------------|-------------|
| 9.765716    | 9.048275    | 1.644263     | 0.020025    | 0.036225    |
| 8.998420667 | 9.804115667 | -1.748027    | 0.000102667 | 0           |
| 6.498581667 | 7.043533667 | -1.473337    | 0.007264667 | 0.006626667 |
| 7.64628     | 8.4712705   | -1.828651    | 0.005186    | 0.002233    |
| 7.9609735   | 8.476869    | -1.440955    | 0.0116695   | 0.00994     |
| 7.790585333 | 8.560487    | -1.712037667 | 0.001856333 | 0.000568667 |
| 7.6842445   | 8.210233    | -1.440886    | 0.024691    | 0.0280525   |
| 7.156091    | 7.8634395   | -1.6328265   | 0.0006345   | 0           |
| 5.0409245   | 5.546588    | -1.427181    | 0.015426    | 0.0182535   |
| 7.028638    | 7.43267     | -1.3232      | 0.020936    | 0.01988     |
| 8.5866705   | 5.7632815   | 7.0917595    | 0.000019    | 0           |
| 9.4496195   | 10.1245425  | -1.6004185   | 0.000173    | 0           |
| 6.681094333 | 5.428537    | 2.415025     | 0.016381667 | 0.027419667 |
| 8.490069    | 6.567562    | 3.790811     | 0.000018    | 0           |
| 7.457991    | 7.121072    | 1.263056     | 0.002938    | 0.001706    |
| 6.977975    | 6.639517    | 1.264405     | 0.015195    | 0.01988     |
| 5.313594    | 5.684612    | -1.293265    | 0.014445    | 0.009809    |
| 8.764342667 | 7.455189333 | 2.495113333  | 6.36667E-05 | 0           |
| 8.842259    | 9.547716    | -1.630661    | 0.004465    | 0.001706    |
| 8.72726     | 9.378393    | -1.570401    | 0.000196    | 0           |
| 6.82851     | 6.280415    | 1.462154     | 0.019401    | 0.036225    |
| 8.378362    | 7.524034    | 1.807917     | 0.000528    | 0           |
| 7.424151    | 8.951137    | -2.881831    | 0.0356      | 0.036225    |
| 10.459623   | 9.730436    | 1.657705     | 0.000147    | 0           |
| 7.625631    | 7.083503    | 1.456119     | 0.016924    | 0.01988     |
| 6.945572    | 7.579405    | -1.551682    | 0.007193    | 0.004466    |
| 7.826299    | 5.648125    | 4.525802     | 0.000102    | 0           |
| 10.765873   | 8.855389    | 3.759352     | 0.000052    | 0           |
| 7.534709    | 5.708454    | 3.546155     | 0.000044    | 0           |
| 10.8145505  | 7.514274    | 10.079321    | 0.000019    | 0           |
| 8.588455    | 7.878849    | 1.635357     | 0.000971    | 0.000282    |
| 9.8703215   | 11.533384   | -3.218651    | 0.000082    | 0           |
| 3.258986    | 2.874375    | 1.305508     | 0.011693    | 0.009809    |
| 7.333908    | 7.9543045   | -1.544218    | 0.0019255   | 0.000282    |
| 6.9846625   | 5.913391    | 2.368761     | 0.003966    | 0.0049045   |

|             |             |              |             |             |
|-------------|-------------|--------------|-------------|-------------|
| 7.879101    | 5.578899333 | 4.941798667  | 1.86667E-05 | 0           |
| 9.0374885   | 8.226433    | 1.761621     | 0.001661    | 0.000853    |
| 9.075986    | 9.516696    | -1.357272    | 0.037001    | 0.036225    |
| 6.72795575  | 7.99150425  | -2.4123775   | 0.00179575  | 0.0004265   |
| 5.670195    | 4.906151    | 1.698245     | 0.00078     | 0           |
| 10.051182   | 8.552634    | 2.825584     | 0.000019    | 0           |
| 6.804884    | 7.248888    | -1.3634105   | 0.0036415   | 0.000994    |
| 6.446394    | 5.92209     | 1.438239     | 0.001375    | 0.000282    |
| 4.979021667 | 4.324554333 | 1.591144667  | 0.001372    | 0.000568667 |
| 4.2947645   | 3.9274295   | 1.2900015    | 0.015061    | 0.0203455   |
| 5.2131265   | 4.368763    | 1.795619     | 0.000608    | 0.000141    |
| 10.222919   | 10.665502   | -1.359036    | 0.001518    | 0.000282    |
| 6.710038    | 5.787606    | 1.909889     | 0.002721    | 0.001488667 |
| 6.755878    | 7.441471    | -1.608363    | 0.000758    | 0           |
| 4.778589    | 2.93687     | 3.584367     | 0.000107    | 0           |
| 6.188028    | 5.694685    | 1.407703     | 0.004738    | 0.001706    |
| 6.906397    | 7.73426     | -1.775055    | 0.000116    | 0           |
| 9.393018    | 9.939728    | -1.460751    | 0.00166     | 0.000282    |
| 5.441014    | 6.133964    | -1.616585    | 0.000798    | 0           |
| 7.587379667 | 6.658609    | 1.907587333  | 0.00007     | 0           |
| 7.0046      | 7.618342    | -1.5678765   | 0.0103425   | 0.00994     |
| 3.292194    | 3.728053    | -1.352716    | 0.00403     | 0.000703    |
| 8.10218     | 7.472103    | 1.547648     | 0.000765    | 0           |
| 6.4584005   | 5.86753     | 1.506586     | 0.0080635   | 0.010081    |
| 7.707062667 | 5.832825667 | 3.698894667  | 0.000018    | 0           |
| 6.345202    | 5.86973     | 1.3981905    | 0.005849    | 0.0049045   |
| 4.275442    | 4.743439    | -1.383187    | 0.005742    | 0.001706    |
| 6.602712    | 7.225431    | -1.539775    | 0.001875    | 0.000282    |
| 4.645834    | 4.27613     | 1.292087     | 0.022381    | 0.036225    |
| 6.7782335   | 5.99676375  | 1.78079825   | 0.00156325  | 0.00060225  |
| 6.0954065   | 6.515235    | -1.3377775   | 0.0058135   | 0.002233    |
| 7.137273    | 9.588399    | -5.46843     | 0.000018    | 0           |
| 6.018925    | 7.559691667 | -2.994199667 | 2.66667E-05 | 0           |
| 6.2985565   | 5.89697475  | 1.3227125    | 0.00490975  | 0.00283525  |
| 4.1231115   | 4.6498065   | -1.4542055   | 0.001383    | 0.000141    |

|             |             |              |             |             |
|-------------|-------------|--------------|-------------|-------------|
| 5.405648    | 6.0823      | -1.601057    | 0.0099185   | 0.004466    |
| 7.6877685   | 7.127457    | 1.475101     | 0.011806    | 0.012173    |
| 9.403859    | 8.898615    | 1.419363     | 0.00084     | 0           |
| 9.707353    | 9.14799     | 1.4736255    | 0.0022555   | 0.000703    |
| 5.213123667 | 4.818949333 | 1.314218667  | 0.014480333 | 0.016833333 |
| 4.855366    | 5.280302    | -1.342513    | 0.020077    | 0.01988     |
| 8.0480235   | 7.135723    | 1.892688     | 0.0002675   | 0           |
| 11.426289   | 10.835757   | 1.505802     | 0.010895    | 0.009809    |
| 5.8174675   | 5.3044805   | 1.432031     | 0.006789    | 0.0071375   |
| 8.067987    | 8.9647225   | -1.91627     | 0.0045575   | 0.002233    |
| 11.033294   | 10.362318   | 1.59215      | 0.00867     | 0.009809    |
| 6.593355333 | 5.805363333 | 1.738384667  | 0.001618667 | 0.000328333 |
| 5.5495145   | 5.9121705   | -1.285851    | 0.0198375   | 0.0148445   |
| 7.986998    | 6.390825333 | 3.505221667  | 0.003559667 | 0.003269667 |
| 5.74479775  | 4.3463005   | 2.6496125    | 0.00009775  | 0           |
| 5.564643    | 6.671202    | -2.153315    | 0.000045    | 0           |
| 7.903306    | 6.196401    | 3.264596     | 0.000018    | 0           |
| 6.853842    | 6.171979    | 1.6477515    | 0.005952    | 0.0049045   |
| 7.397059    | 7.983244    | -1.501271    | 0.003183    | 0.000703    |
| 8.857428    | 6.779061    | 4.223288     | 0.000019    | 0           |
| 8.996309    | 9.415355    | -1.337043    | 0.031563    | 0.036225    |
| 8.643216    | 7.82333     | 1.765266     | 0.000147    | 0           |
| 5.58457175  | 5.02654625  | 1.48385275   | 0.0059285   | 0.009232    |
| 4.135517    | 2.738229    | 2.63406      | 0.0001      | 0           |
| 11.211436   | 10.465877   | 1.676624     | 0.000687    | 0           |
| 7.309250333 | 5.798013333 | 2.928298333  | 0.000024    | 0           |
| 7.1823626   | 7.9436454   | -1.7276758   | 0.0019782   | 0.0004818   |
| 5.848303    | 6.309151    | -1.37848     | 0.004129    | 0.000994    |
| 6.362167667 | 7.236127    | -1.859327667 | 0.001739667 | 0.000568667 |
| 9.071557    | 9.803902    | -1.661337    | 0.003832    | 0.000703    |
| 4.8086485   | 5.5583      | -1.686193    | 0.0007775   | 0           |
| 8.8564295   | 7.98293     | 1.8335165    | 0.006806    | 0.00994     |
| 6.763159    | 6.111876    | 1.6257975    | 0.0080535   | 0.00994     |
| 8.001358    | 8.779136    | -1.714489    | 0.010398    | 0.004466    |
| 7.72382     | 8.574717    | -1.803622    | 0.000205    | 0           |

|             |             |              |             |             |
|-------------|-------------|--------------|-------------|-------------|
| 7.4088905   | 6.713886    | 1.620039     | 0.0012825   | 0.000282    |
| 5.654044    | 4.708287    | 1.926199     | 0.001682    | 0.000703    |
| 9.5898295   | 8.7810685   | 1.766299     | 0.0003005   | 0           |
| 6.0253505   | 4.7780675   | 2.4677575    | 0.000109    | 0           |
| 3.754595    | 4.260204    | -1.419723    | 0.01708     | 0.009809    |
| 9.236562667 | 7.307818    | 3.888326     | 0.000019    | 0           |
| 5.695877    | 6.311358333 | -1.538886    | 0.000952    | 0.000094    |
| 6.942668333 | 6.348865667 | 1.553694     | 0.006223333 | 0.007195333 |
| 8.670713    | 7.326145    | 2.539542     | 0.000028    | 0           |
| 7.494462    | 7.818635    | -1.251946    | 0.02964     | 0.036225    |
| 11.203763   | 7.449975    | 13.489719    | 0.000018    | 0           |
| 7.597253    | 6.395658    | 2.302229333  | 0.000258667 | 0           |
| 7.6597412   | 6.3628708   | 2.5376372    | 0.0000494   | 0           |
| 8.580357    | 9.373668    | -1.733048    | 0.0001      | 0           |
| 6.85430475  | 6.06199     | 1.78007825   | 0.0057725   | 0.0093025   |
| 7.288106333 | 8.161444667 | -1.850001333 | 0.003443667 | 0.001488667 |
| 5.606397    | 6.0318545   | -1.344649    | 0.0128725   | 0.010793    |
| 7.210284    | 6.538925    | 1.592572     | 0.001121    | 0.000282    |
| 4.3258025   | 4.980812    | -1.575113    | 0.004809    | 0.002233    |
| 6.763389    | 6.35595     | 1.326329     | 0.003428    | 0.001706    |
| 6.4037535   | 7.0184635   | -1.5312755   | 0.001374    | 0.0003515   |
| 8.833094667 | 7.628322333 | 2.320801667  | 0.000072    | 0           |
| 6.9593145   | 6.3614575   | 1.513573     | 0.0019225   | 0.000853    |
| 8.449123    | 9.173071    | -1.651696    | 0.000619    | 0           |
| 6.371595    | 6.959381    | -1.502938    | 0.000624    | 0           |
| 5.891912    | 5.230066    | 1.582105     | 0.000186    | 0           |
| 9.345457    | 10.022104   | -1.59842     | 0.001269    | 0.000282    |
| 7.616433    | 6.15993925  | 2.82886075   | 0.0000305   | 0           |
| 8.068306    | 7.449509    | 1.535594     | 0.003062    | 0.001706    |
| 8.247409333 | 6.700313    | 3.002957667  | 0.000029    | 0           |
| 8.047827    | 7.667049    | 1.30580575   | 0.012161    | 0.01625925  |
| 7.971973    | 3.8652705   | 19.131326    | 0.0000275   | 0           |
| 10.915127   | 7.169017    | 13.418112    | 0.000018    | 0           |
| 9.533214    | 10.1478615  | -1.5346265   | 0.00982     | 0.005256    |
| 7.240031    | 7.677577    | -1.354298    | 0.01005     | 0.004466    |

|             |             |             |             |             |
|-------------|-------------|-------------|-------------|-------------|
| 5.7799365   | 5.277155    | 1.4270585   | 0.00061     | 0.000141    |
| 6.945382    | 7.526906333 | -1.497582   | 0.001018667 | 0.000234333 |
| 7.081856    | 8.069838    | -1.983408   | 0.000577    | 0           |
| 5.168947    | 6.1503875   | -1.9889765  | 0.000143    | 0           |
| 8.799941429 | 8.212405143 | 1.508269571 | 0.007872143 | 0.009120571 |
| 8.471196    | 7.949657    | 1.435486    | 0.006747    | 0.004466    |
| 6.258246    | 6.567429    | -1.239006   | 0.001751    | 0.000282    |
| 3.8353705   | 4.3307365   | -1.409715   | 0.002929    | 0.0004925   |
| 5.6076585   | 6.630475    | -2.0336335  | 0.000135    | 0           |
| 8.076798667 | 6.843999667 | 2.352826333 | 0.000022    | 0           |
| 4.364201    | 4.047655    | 1.245345    | 0.011001    | 0.009809    |
| 8.817769    | 8.024842    | 1.732586    | 0.000036    | 0           |
| 8.8419395   | 9.3218895   | -1.398649   | 0.0203905   | 0.0189655   |
| 6.406515    | 6.762247    | -1.279635   | 0.024445    | 0.01988     |
| 11.41099    | 10.755043   | 1.57565     | 0.000119    | 0           |
| 7.497066667 | 6.915939    | 1.510516333 | 0.014155667 | 0.020190333 |
| 4.1919405   | 3.542944    | 1.597929    | 0.001971    | 0.000853    |
| 6.913091    | 7.207351    | -1.226256   | 0.01245     | 0.009809    |
| 6.156118    | 6.807146    | -1.589756   | 0.00451     | 0.002233    |
| 4.397633    | 5.264096    | -1.823189   | 0.000223    | 0           |
| 7.621837333 | 5.633843    | 4.176114667 | 1.93333E-05 | 0           |
| 6.99166     | 6.504319    | 1.401858    | 0.007302    | 0.004466    |
| 7.831792    | 7.362164    | 1.384752    | 0.008122    | 0.009809    |
| 8.335396    | 7.379807    | 1.93937     | 0.000123    | 0           |
| 6.174103    | 7.025707    | -1.804507   | 0.000158    | 0           |
| 8.327839    | 9.063049    | -1.664641   | 0.001129    | 0           |
| 6.545316    | 5.9444      | 1.516679    | 0.002111    | 0.000703    |
| 7.032608    | 6.594492    | 1.354834    | 0.014243    | 0.01988     |
| 6.964019    | 7.67980625  | -1.6715735  | 0.002988    | 0.001187    |
| 7.130062    | 7.649315    | -1.4539335  | 0.009882    | 0.00994     |
| 10.068224   | 9.137018    | 1.90687     | 0.000216    | 0           |
| 8.793531    | 7.303754    | 2.808457    | 0.000028    | 0           |
| 10.873071   | 9.921791    | 1.933588    | 0.000298    | 0           |
| 10.0239435  | 9.2477945   | 1.725453    | 0.0017095   | 0.000853    |
| 5.8914435   | 6.3846085   | -1.4169405  | 0.0094395   | 0.004466    |



|             |             |              |             |             |
|-------------|-------------|--------------|-------------|-------------|
| 7.164548    | 7.882718    | -1.645093    | 0.000086    | 0           |
| 6.9539435   | 5.2871515   | 3.3191235    | 0.0002115   | 0           |
| 6.746787    | 7.27203     | -1.440248    | 0.005495667 | 0.002057333 |
| 6.451033    | 5.641349    | 1.752828     | 0.00049     | 0           |
| 4.827969    | 4.251295    | 1.491407     | 0.013185    | 0.01988     |
| 10.213494   | 10.794224   | -1.495606    | 0.002715    | 0.000703    |
| 10.649256   | 10.234326   | 1.333234     | 0.009025    | 0.009809    |
| 3.346034    | 3.949667    | -1.519538    | 0.000852    | 0           |
| 9.577101    | 7.484953    | 4.263824     | 0.000019    | 0           |
| 6.331405    | 4.544257    | 3.451321     | 0.000028    | 0           |
| 5.09674     | 5.665710667 | -1.50082667  | 0.002937667 | 0.001582667 |
| 6.036651    | 6.543802    | -1.421241    | 0.001563    | 0.000282    |
| 5.292226    | 6.37552     | -2.118869    | 0.00052     | 0           |
| 6.383221    | 6.726715    | -1.268826    | 0.023788    | 0.01988     |
| 9.935729    | 10.57817    | -1.560968    | 0.006215    | 0.001706    |
| 6.960302333 | 4.082935333 | 7.960233333  | 0.000109    | 0           |
| 5.334363    | 4.279133    | 2.07805      | 0.000151    | 0           |
| 6.215912667 | 4.657587    | 3.307179333  | 0.000634333 | 0.000234333 |
| 6.696828    | 7.2820025   | -1.5004295   | 0.0111435   | 0.00994     |
| 7.525338    | 5.792819    | 3.323074     | 0.000019    | 0           |
| 8.016434    | 7.65417     | 1.285441     | 0.008907    | 0.009809    |
| 6.225869    | 7.705084    | -2.885271333 | 0.000174333 | 0           |
| 10.560519   | 9.935314    | 1.542429     | 0.005296    | 0.004466    |
| 6.270941333 | 5.579912333 | 1.620970667  | 0.003373667 | 0.001957333 |
| 5.2783855   | 4.861622    | 1.338325     | 0.0147185   | 0.023017    |
| 5.930893    | 6.4354335   | -1.4303005   | 0.003244    | 0.000994    |
| 7.998132    | 8.525192    | -1.44099     | 0.005244    | 0.001706    |
| 6.809905    | 7.911539    | -2.145976    | 0.00008     | 0           |
| 8.5416385   | 7.884256    | 1.5796755    | 0.0083215   | 0.00994     |
| 4.001637    | 3.095425    | 1.874119     | 0.010008    | 0.009809    |
| 6.173412    | 6.828239    | -1.599237    | 0.000876    | 0.000141    |
| 7.055248    | 8.0428605   | -2.0048815   | 0.0035925   | 0.002628    |
| 5.124323    | 5.802142    | -1.620396    | 0.005603    | 0.002233    |
| 3.162292    | 2.85048     | 1.241266     | 0.019418    | 0.036225    |
| 5.471263    | 4.622347    | 1.8418795    | 0.008279    | 0.0102915   |

|             |             |             |             |             |
|-------------|-------------|-------------|-------------|-------------|
| 6.018182    | 5.2635156   | 1.697353    | 0.0016138   | 0.0010338   |
| 6.541966    | 5.822553    | 1.646512    | 0.001287    | 0.000282    |
| 5.395666    | 4.861337    | 1.448268    | 0.018437    | 0.036225    |
| 5.629131    | 4.34711     | 2.701259333 | 0.003185667 | 0.003269667 |
| 9.396065    | 7.186573    | 4.625123    | 0.000019    | 0           |
| 6.097327    | 6.593911    | -1.41087    | 0.000309    | 0           |
| 10.4558     | 8.21437     | 4.728655    | 0.000018    | 0           |
| 8.732725167 | 8.102772    | 1.553660333 | 0.005592167 | 0.0048755   |
| 8.313482    | 6.243653    | 4.19837     | 0.000019    | 0           |
| 7.603558    | 6.933814    | 1.590792    | 0.002007    | 0.000703    |
| 8.5140825   | 7.016687    | 2.824602    | 0.000054    | 0           |
| 6.6046305   | 6.076794    | 1.4462605   | 0.008115    | 0.0102915   |
| 6.793584    | 7.243776    | -1.366221   | 0.001127    | 0           |
| 9.031565    | 9.579522    | -1.462013   | 0.000254    | 0           |
| 7.265664    | 7.768508    | -1.417003   | 0.007543    | 0.004466    |
| 7.412428    | 6.290712667 | 2.197557333 | 0.000047    | 0           |
| 6.6933745   | 6.2473745   | 1.369225    | 0.0123115   | 0.0181125   |
| 5.985429667 | 5.019776333 | 2.009182333 | 0.000787667 | 0.000234333 |
| 7.253407    | 7.755967    | -1.416725   | 0.010553    | 0.004466    |
| 4.922439    | 5.336531    | -1.33246    | 0.027742    | 0.036225    |
| 6.9382135   | 6.0186215   | 1.904121    | 0.000172    | 0           |
| 7.379408    | 7.75422     | -1.296671   | 0.009341    | 0.004466    |
| 8.875383    | 8.260765    | 1.531153    | 0.001256    | 0.000282    |
| 8.563152    | 9.009047    | -1.362159   | 0.000142    | 0           |
| 4.784647    | 4.219886    | 1.479143    | 0.000976    | 0.000282    |
| 8.0865065   | 7.3430155   | 1.705829    | 0.008768    | 0.00994     |
| 4.299921    | 3.422834    | 1.836663    | 0.002646    | 0.000703    |
| 7.534912    | 7.243939    | 1.223465    | 0.023467    | 0.036225    |
| 9.086798    | 7.883962    | 2.301916    | 0.000061    | 0           |
| 7.303954    | 6.738523    | 1.47983     | 0.001735    | 0.000703    |
| 7.0808      | 6.344893    | 1.665444    | 0.000121    | 0           |
| 11.036926   | 9.994628    | 2.059505    | 0.000171    | 0           |
| 8.172699    | 9.2606305   | -2.1518435  | 0.000159    | 0           |
| 8.309852    | 7.690214    | 1.536489    | 0.000496    | 0           |
| 4.221139    | 4.506996    | -1.219134   | 0.002971    | 0.000703    |

|             |             |              |             |             |
|-------------|-------------|--------------|-------------|-------------|
| 5.969082    | 6.47673     | -1.42173     | 0.004358    | 0.001706    |
| 6.758879    | 5.850385    | 1.877085     | 0.000251    | 0           |
| 6.453441    | 7.130758    | -1.599163    | 0.000565    | 0           |
| 6.7415555   | 7.578271    | -1.78658     | 0.0003205   | 0           |
| 7.417222667 | 8.239213667 | -1.815725667 | 0.007875667 | 0.006720667 |
| 7.992531    | 6.64412     | 2.571673     | 0.000052    | 0           |
| 5.392854    | 5.840693    | -1.363995    | 0.011554    | 0.009809    |
| 8.047457    | 8.733256    | -1.608593    | 0.000182    | 0           |
| 7.79816     | 8.37651775  | -1.4985655   | 0.0130355   | 0.00994     |
| 5.465502    | 5.802365    | -1.263007    | 0.027928    | 0.036225    |
| 8.162368    | 8.771206    | -1.52503     | 0.008455    | 0.004466    |
| 8.333394    | 7.936419    | 1.316744     | 0.003913    | 0.001706    |
| 7.542135    | 8.402847    | -1.815935    | 0.002588    | 0.000703    |
| 9.582946    | 9.004539    | 1.493199     | 0.002083    | 0.000703    |
| 7.7817255   | 9.105402    | -2.547243    | 0.000184    | 0           |
| 5.657845    | 5.185481    | 1.387382     | 0.025784    | 0.036225    |
| 7.022471333 | 8.325490333 | -2.580137333 | 0.000237667 | 0           |
| 5.614398    | 5.945805    | -1.25824     | 0.026446    | 0.01988     |
| 5.841885    | 6.552195    | -1.636155    | 0.031018    | 0.036225    |
| 5.9896765   | 6.7882105   | -1.7394755   | 0.001462    | 0.0003515   |
| 7.100558    | 7.782069    | -1.603819    | 0.000209    | 0           |
| 5.1869765   | 6.108431    | -1.935499    | 0.0007255   | 0.000141    |
| 9.731896    | 10.189784   | -1.37353     | 0.001085    | 0           |
| 5.577032    | 6.340113    | -1.7321465   | 0.0052655   | 0.002233    |
| 3.375618    | 2.931154    | 1.360808     | 0.004883    | 0.004466    |
| 5.2852835   | 5.827636    | -1.4671455   | 0.0072865   | 0.0050455   |
| 5.815076    | 6.396338    | -1.496157    | 0.000423    | 0           |
| 4.655533    | 4.3741955   | 1.2154195    | 0.01186     | 0.0148445   |
| 7.657473    | 7.1654465   | 1.4087245    | 0.0026995   | 0.002233    |
| 9.6397155   | 10.400106   | -1.7007575   | 0.001879    | 0.0003515   |
| 10.097064   | 9.655764    | 1.357827     | 0.00342     | 0.001706    |
| 3.949376    | 3.095867    | 1.806891     | 0.00129     | 0.000282    |
| 8.9226935   | 9.538107    | -1.535386    | 0.0023995   | 0.000853    |
| 7.345878333 | 6.316023667 | 2.083910667  | 0.002160333 | 0.001582667 |
| 10.060017   | 7.962448    | 4.279877     | 0.000018    | 0           |

|             |             |             |            |            |
|-------------|-------------|-------------|------------|------------|
| 7.575556    | 6.776974    | 1.73939     | 0.000039   | 0          |
| 8.500457    | 7.250941    | 2.377616    | 0.000067   | 0          |
| 7.026269    | 7.620817    | -1.51       | 0.000187   | 0          |
| 9.2037384   | 8.0609848   | 2.2342492   | 0.0004908  | 0.0001128  |
| 10.86933333 | 9.557981333 | 2.513118333 | 0.000032   | 0          |
| 7.372666    | 6.251487    | 2.175464    | 0.0000255  | 0          |
| 7.404534    | 6.78796975  | 1.5515165   | 0.00435625 | 0.0060865  |
| 7.2276395   | 8.097064    | -1.844028   | 0.0007485  | 0.000141   |
| 8.229996    | 7.625567    | 1.520377    | 0.001446   | 0.000282   |
| 6.7443605   | 5.996504    | 1.698762    | 0.001999   | 0.000853   |
| 7.047655    | 6.04792675  | 2.05231075  | 0.00141175 | 0.0011165  |
| 5.984691    | 5.545573    | 1.355775    | 0.010162   | 0.009809   |
| 7.859694    | 8.894131    | -2.048313   | 0.000816   | 0          |
| 4.938512    | 4.102496    | 1.785113    | 0.020489   | 0.036225   |
| 10.174346   | 10.474985   | -1.23169    | 0.020487   | 0.01988    |
| 5.66155425  | 6.17107575  | -1.4252405  | 0.0087605  | 0.005256   |
| 6.500079    | 7.093292    | -1.5086175  | 0.0062285  | 0.0025845  |
| 6.64626125  | 7.37679725  | -1.6719925  | 0.00142425 | 0.00024625 |
| 7.39384425  | 8.04972625  | -1.583588   | 0.00423525 | 0.001543   |
| 7.289138    | 8.3357855   | -2.119703   | 0.000645   | 0.000141   |
| 8.126768    | 8.648129    | -1.435309   | 0.004837   | 0.001706   |
| 6.39282     | 7.369347    | -1.967722   | 0.000183   | 0          |
| 6.509987    | 6.827095    | -1.24583    | 0.0224     | 0.01988    |
| 7.937615    | 8.376415    | -1.355476   | 0.002674   | 0.000703   |
| 9.938703    | 9.186866    | 1.716138167 | 0.00116    | 0.0004015  |
| 4.015602    | 4.903502    | -1.85048    | 0.00053    | 0          |
| 7.597968    | 8.240203    | -1.560746   | 0.000021   | 0          |
| 8.57377     | 6.148967    | 5.369556    | 0.000055   | 0          |
| 6.271844    | 5.905528    | 1.289057    | 0.01331    | 0.01988    |
| 8.170472    | 6.079462    | 4.260462    | 0.000022   | 0          |
| 6.555918    | 7.428434    | -1.830854   | 0.000249   | 0          |
| 4.0219295   | 4.5585135   | -1.46837    | 0.0151105  | 0.0181125  |
| 7.507463    | 6.559672    | 1.928917    | 0.003617   | 0.001706   |
| 8.390217    | 9.366845    | -1.967861   | 0.000555   | 0          |
| 7.335302    | 6.623938    | 1.6387065   | 0.00310575 | 0.0016135  |

|             |             |             |             |             |
|-------------|-------------|-------------|-------------|-------------|
| 9.0377095   | 8.38107     | 1.5815985   | 0.019051    | 0.023017    |
| 7.11795     | 7.434586    | -1.245423   | 0.005122    | 0.001706    |
| 5.801805    | 6.482394667 | -1.607732   | 0.006332667 | 0.006626667 |
| 9.983303    | 9.498904    | 1.399002    | 0.020249    | 0.036225    |
| 8.509538    | 8.910673    | -1.320546   | 0.02318     | 0.01988     |
| 7.150916    | 6.566658    | 1.499267    | 0.002716    | 0.000703    |
| 6.5744325   | 5.4245415   | 2.2555885   | 0.000041    | 0           |
| 7.3782435   | 7.997152    | -1.5386635  | 0.0080435   | 0.0049045   |
| 5.707218    | 6.394116    | -1.609819   | 0.011072    | 0.004466    |
| 11.267776   | 11.997527   | -1.658353   | 0.001037    | 0           |
| 7.3672605   | 8.2815855   | -1.8871815  | 0.000539    | 0           |
| 7.397581    | 6.186786    | 2.316337    | 0.000038    | 0           |
| 8.803767    | 8.304343    | 1.413649    | 0.022318    | 0.036225    |
| 9.732381    | 9.065351333 | 1.592855667 | 0.001093667 | 0.000234333 |
| 7.262249    | 8.176117    | -1.884089   | 0.000767    | 0           |
| 12.758059   | 10.260637   | 5.646756    | 0.000018    | 0           |
| 11.545545   | 10.688574   | 1.811231    | 0.000162    | 0           |
| 13.799033   | 12.444232   | 2.557619    | 0.000018    | 0           |
| 7.401971667 | 5.984692667 | 2.707733    | 0.000334667 | 0           |
| 5.761711    | 5.1057855   | 1.612714    | 0.0064105   | 0.0057575   |
| 4.815043    | 4.5080635   | 1.2372725   | 0.009596    | 0.012173    |
| 10.619871   | 11.35472    | -1.664223   | 0.001157    | 0           |
| 6.6042175   | 7.01287     | -1.3299755  | 0.0188235   | 0.0148445   |
| 8.612597    | 9.078309    | -1.380999   | 0.004363    | 0.001706    |
| 7.1974715   | 6.4129245   | 1.746433    | 0.0004755   | 0           |
| 6.3399435   | 5.8767675   | 1.3808035   | 0.011188    | 0.012173    |
| 4.051113    | 4.777457    | -1.65444    | 0.001572    | 0.000282    |
| 6.974993    | 7.614655    | -1.56732025 | 0.005918    | 0.0050405   |
| 4.8658225   | 5.516734    | -1.572644   | 0.005139    | 0.002233    |
| 9.7092565   | 8.094329    | 3.08541475  | 0.000028    | 0           |
| 4.818694    | 4.137274    | 1.603717    | 0.013402    | 0.01988     |
| 6.461566    | 5.766241    | 1.61925     | 0.000047    | 0           |
| 6.851766    | 6.3611245   | 1.405984    | 0.001121    | 0.0003515   |
| 9.2908506   | 10.038551   | -1.693302   | 0.0001934   | 0           |
| 5.0469365   | 5.4156685   | -1.2912305  | 0.026623    | 0.023017    |

|             |             |             |             |             |
|-------------|-------------|-------------|-------------|-------------|
| 5.4078705   | 5.854511    | -1.363983   | 0.0061345   | 0.0025845   |
| 7.780083    | 8.452429    | -1.593662   | 0.021205    | 0.01988     |
| 5.452132333 | 4.771257667 | 1.655942    | 0.003672    | 0.002057333 |
| 3.679016    | 3.327233    | 1.276137    | 0.006059    | 0.004466    |
| 9.434818333 | 8.275128667 | 2.307546333 | 0.000150667 | 0           |
| 8.860545    | 7.290541    | 2.969054    | 0.000019    | 0           |
| 7.053922    | 5.616561    | 2.708249    | 0.000019    | 0           |
| 6.567718333 | 5.214303333 | 2.677234333 | 0.000119    | 0           |
| 7.1048185   | 7.9231125   | -1.763434   | 0.0011725   | 0.000141    |
| 7.2880304   | 6.1991822   | 2.2336856   | 0.0011602   | 0.0008932   |
| 8.170674333 | 6.863433333 | 2.588564    | 5.66667E-05 | 0           |
| 7.410576    | 6.2018695   | 2.471547    | 0.002949    | 0.002233    |
| 5.986914    | 5.339584    | 1.566267    | 0.000499    | 0           |
| 9.290007    | 7.315237    | 3.930656    | 0.000019    | 0           |
| 5.998088    | 6.399665    | -1.320951   | 0.008649    | 0.004466    |
| 5.372117    | 6.000076    | -1.545377   | 0.002707    | 0.000703    |
| 5.839295    | 5.34141     | 1.412142    | 0.004791    | 0.004466    |
| 6.727421    | 5.037937    | 3.225413    | 0.000019    | 0           |
| 9.677912667 | 7.635476    | 4.152354667 | 1.83333E-05 | 0           |
| 5.101553    | 5.6379415   | -1.4559495  | 0.0007045   | 0           |
| 4.745668    | 4.366021    | 1.301024    | 0.011944    | 0.01988     |
| 7.52309     | 6.416514    | 2.15334     | 0.000028    | 0           |
| 6.964443    | 6.007895    | 1.940662    | 0.000536    | 0           |
| 4.217204    | 3.827327    | 1.310282    | 0.002707    | 0.000703    |
| 5.881233    | 5.546387    | 1.261244    | 0.021586    | 0.036225    |
| 7.6543865   | 8.586138    | -1.941867   | 0.0024755   | 0.000853    |
| 5.696689667 | 6.377593    | -1.64662    | 0.012286    | 0.013563667 |
| 5.887464    | 6.452109    | -1.479024   | 0.013597    | 0.009809    |
| 7.36819475  | 6.59646425  | 1.71569775  | 0.00026375  | 0           |
| 3.583225    | 3.205112    | 1.299641    | 0.012662    | 0.01988     |
| 5.930425    | 6.321659    | -1.311515   | 0.006177    | 0.001706    |
| 7.592048    | 7.980632    | -1.309108   | 0.016485    | 0.009809    |
| 7.713241    | 6.462033    | 2.380407    | 0.000032    | 0           |
| 7.156574    | 5.737206    | 2.674683    | 0.001514    | 0.000282    |
| 5.118094    | 5.639006    | -1.434863   | 0.020483    | 0.01988     |

|             |             |              |             |             |
|-------------|-------------|--------------|-------------|-------------|
| 4.921695667 | 5.471807667 | -1.476764333 | 0.010115333 | 0.006539333 |
| 6.496608    | 6.885799    | -1.3111045   | 0.02174     | 0.0203455   |
| 7.966678    | 8.325242    | -1.282149    | 0.025503    | 0.01988     |
| 6.6666675   | 5.9038175   | 1.7024635    | 0.001156    | 0.0003515   |
| 11.186309   | 10.44076975 | 1.6777775    | 0.000512    | 0.0000705   |
| 6.9929575   | 5.346163    | 3.5350565    | 0.0000625   | 0           |
| 9.527336    | 9.852212    | -1.252557    | 0.036222    | 0.036225    |
| 5.984879    | 6.525606    | -1.454705    | 0.018182    | 0.01988     |
| 7.075584    | 7.81219     | -1.666251    | 0.000271    | 0           |
| 9.604005    | 10.120472   | -1.430448    | 0.005875    | 0.001706    |
| 6.9730698   | 5.7292588   | 2.4552894    | 0.0002724   | 0.0000564   |
| 9.936037    | 8.713991    | 2.332772     | 0.000023    | 0           |
| 8.4893765   | 7.479243    | 2.041782     | 0.000027    | 0           |
| 8.437397    | 9.016866    | -1.494299    | 0.001076    | 0           |
| 7.652902    | 8.0436375   | -1.3123145   | 0.023965    | 0.0203455   |
| 6.26758875  | 7.17644375  | -1.882283    | 0.000968    | 0.0000705   |
| 8.7025155   | 9.287909    | -1.501859    | 0.0150585   | 0.0182535   |
| 4.65144475  | 5.23793225  | -1.515497    | 0.00114825  | 0.00017575  |
| 6.122658    | 6.768791    | -1.564968    | 0.001918    | 0.000282    |
| 6.426169    | 5.631501667 | 1.781269333  | 0.005185667 | 0.006626667 |
| 4.536011    | 4.946063    | -1.328734    | 0.006857    | 0.001706    |
| 10.626219   | 10.986808   | -1.28395     | 0.027684    | 0.036225    |
| 6.029199    | 5.525132    | 1.418207     | 0.002741    | 0.000703    |
| 8.57976     | 9.730898    | -2.22089     | 0.000026    | 0           |
| 5.810287    | 4.242923    | 2.963626     | 0.000033    | 0           |
| 7.878169667 | 6.690345333 | 2.470483667  | 0.000232667 | 0           |
| 8.867406    | 9.218801    | -1.275794    | 0.032943    | 0.036225    |
| 4.811650333 | 4.232269    | 1.49842      | 0.006779667 | 0.006539333 |
| 7.383985    | 5.893525    | 2.809786     | 0.000023    | 0           |
| 8.057126    | 8.478212    | -1.338936    | 0.001646    | 0.000282    |
| 6.008401    | 5.025835    | 1.975976     | 0.000059    | 0           |
| 4.854814333 | 4.147431    | 1.648147667  | 0.005582    | 0.006955    |
| 5.95618     | 6.852171    | -1.860889    | 0.001354    | 0.000282    |
| 7.869614    | 8.464806    | -1.510891    | 0.0005355   | 0           |
| 7.280098667 | 7.999565333 | -1.650589333 | 0.003433667 | 0.000803    |

|             |             |             |             |             |
|-------------|-------------|-------------|-------------|-------------|
| 5.274118    | 5.701769    | -1.345041   | 0.003147    | 0.000703    |
| 6.020525    | 6.731585    | -1.637006   | 0.000294    | 0           |
| 8.402470667 | 9.265622333 | -1.828802   | 0.001094333 | 0.000234333 |
| 6.719605    | 7.227954    | -1.422421   | 0.0245      | 0.01988     |
| 7.448168    | 6.022042    | 2.68724     | 0.000049    | 0           |
| 5.263842    | 4.908794    | 1.279029    | 0.008983    | 0.009809    |
| 6.839487    | 7.111511    | -1.207501   | 0.010925    | 0.004466    |
| 7.719954    | 5.694464    | 4.071301    | 0.000101    | 0           |
| 6.201801    | 5.688672    | 1.427142    | 0.003649    | 0.001706    |
| 5.680028    | 5.960493    | -1.214586   | 0.0245      | 0.01988     |
| 6.96721     | 4.770399    | 4.584647    | 0.000029    | 0           |
| 6.160304    | 6.611799    | -1.367456   | 0.022299    | 0.01988     |
| 6.246312    | 7.287496    | -2.057916   | 0.00008     | 0           |
| 8.545992    | 7.992563    | 1.467569    | 0.013409    | 0.01988     |
| 5.446735    | 7.2091915   | -3.4011795  | 0.0000285   | 0           |
| 5.479432    | 5.98214     | -1.416871   | 0.001455    | 0.000282    |
| 5.874262    | 6.171441    | -1.228739   | 0.024496    | 0.01988     |
| 6.152493    | 6.449888    | -1.228923   | 0.01647     | 0.009809    |
| 5.893751    | 6.391692    | -1.412197   | 0.004911    | 0.001706    |
| 8.945935667 | 7.431037667 | 2.863804333 | 0.000024    | 0           |
| 5.7528435   | 5.1363435   | 1.5358005   | 0.001198    | 0.0003515   |
| 10.815822   | 9.223707    | 3.014911    | 0.00002     | 0           |
| 9.079175    | 6.667899    | 5.319447    | 0.000018    | 0           |
| 8.2952435   | 8.757811    | -1.378035   | 0.03684     | 0.036225    |
| 5.797619    | 4.813638333 | 2.01007     | 0.001034333 | 0.000234333 |
| 9.1050945   | 8.3070565   | 1.7890715   | 0.009084    | 0.00994     |
| 7.500614    | 7.083872    | 1.33491     | 0.001647    | 0.000282    |
| 6.761614    | 6.188113    | 1.48813     | 0.001004    | 0.000282    |
| 4.940678    | 4.670335    | 1.206095    | 0.010515    | 0.009809    |
| 5.611434    | 4.9973515   | 1.5668765   | 0.001565    | 0.0003515   |
| 7.8813965   | 7.0138385   | 1.836079    | 0.0019515   | 0.000853    |
| 7.5294026   | 6.8236736   | 1.6482108   | 0.0031808   | 0.0022994   |
| 5.561887    | 5.266929    | 1.226849    | 0.011759    | 0.009809    |
| 5.496316333 | 4.944833333 | 1.472877    | 0.001696333 | 0.000662667 |
| 6.08314     | 6.841964    | -1.69211    | 0.000182    | 0           |



|             |             |             |            |             |
|-------------|-------------|-------------|------------|-------------|
| 7.310462667 | 6.798741667 | 1.434883333 | 0.003898   | 0.003363667 |
| 5.9561185   | 5.5173345   | 1.356033    | 0.008674   | 0.009809    |
| 7.965951    | 8.7730935   | -1.76753    | 0.0032775  | 0.000853    |
| 8.481494    | 9.321683    | -1.790284   | 0.000085   | 0           |
| 6.8673875   | 6.373793    | 1.408257    | 0.000661   | 0           |
| 5.786592    | 6.28818     | -1.415772   | 0.033146   | 0.036225    |
| 5.144646    | 5.47372     | -1.256207   | 0.008645   | 0.004466    |
| 6.2548695   | 5.531735    | 1.654309    | 0.000189   | 0           |
| 6.561341    | 5.479758    | 2.116357    | 0.000033   | 0           |
| 5.8676735   | 5.2615795   | 1.529752    | 0.01393    | 0.018464    |
| 4.967459    | 5.63581     | -1.589256   | 0.000681   | 0           |
| 6.377178    | 5.203822    | 2.255357    | 0.000809   | 0           |
| 7.517039333 | 6.805945333 | 1.643429    | 0.00078    | 0.000094    |
| 7.880945    | 8.383424    | -1.417656   | 0.0138615  | 0.010793    |
| 6.948874    | 6.44184     | 1.421126    | 0.000892   | 0           |
| 6.722988    | 7.086011    | -1.286117   | 0.009652   | 0.004466    |
| 6.21541     | 6.7570515   | -1.4556505  | 0.003462   | 0.000703    |
| 6.868435667 | 6.02248     | 1.806983    | 0.000606   | 0           |
| 6.543911    | 6.143182    | 1.320175    | 0.007768   | 0.009809    |
| 6.2002815   | 5.48499075  | 1.653036    | 0.00188475 | 0.0011165   |
| 7.549048    | 8.851335    | -2.466194   | 0.000084   | 0           |
| 7.388513    | 6.923705    | 1.380134    | 0.008091   | 0.009809    |
| 11.106158   | 9.658433    | 2.727775    | 0.00002    | 0           |
| 8.286037    | 8.960788    | -1.596321   | 0.000951   | 0           |
| 7.550556    | 8.016554    | -1.381272   | 0.002406   | 0.000703    |
| 3.883022    | 4.328818    | -1.362066   | 0.022851   | 0.01988     |
| 9.965787    | 10.453783   | -1.402495   | 0.003777   | 0.000703    |
| 5.235095    | 4.699369    | 1.4507845   | 0.0168635  | 0.0280525   |
| 7.835249    | 6.5041985   | 2.531695    | 0.000031   | 0           |
| 4.927217    | 5.573226    | -1.564834   | 0.004893   | 0.001706    |
| 6.198345    | 6.600181    | -1.321188   | 0.006006   | 0.001706    |
| 8.110126    | 7.370112    | 1.672408    | 0.000043   | 0           |
| 8.00917425  | 7.45706     | 1.47374825  | 0.00431225 | 0.0053965   |
| 7.8292388   | 6.911151    | 1.9068488   | 0.0009034  | 0.0002534   |
| 8.068206333 | 7.380277833 | 1.632063167 | 0.0076895  | 0.008545833 |

|             |             |             |             |             |
|-------------|-------------|-------------|-------------|-------------|
| 8.764613667 | 7.572647    | 2.369341667 | 0.002550667 | 0.001488667 |
| 6.950187    | 7.431945    | -1.396445   | 0.00159     | 0.000282    |
| 8.712941    | 7.034644    | 3.2005      | 0.000019    | 0           |
| 8.0277815   | 7.1726725   | 1.83815     | 0.0000875   | 0           |
| 5.943675    | 6.771909    | -1.775511   | 0.000117    | 0           |
| 4.622043    | 5.1867505   | -1.5104155  | 0.0176155   | 0.0182535   |
| 7.20188     | 7.841463    | -1.557879   | 0.004239    | 0.001706    |
| 6.928975    | 7.233341    | -1.234876   | 0.014039    | 0.009809    |
| 8.7329385   | 8.219461    | 1.4278175   | 0.003713    | 0.002374    |
| 7.451604    | 7.058854    | 1.312894    | 0.002306    | 0.000703    |
| 8.9318415   | 7.9067205   | 2.0755375   | 0.001085    | 0.0003515   |
| 8.924477    | 6.195869    | 6.7934935   | 0.0000185   | 0           |
| 8.277332667 | 7.649910333 | 1.569442667 | 0.003855    | 0.002151333 |
| 6.288776    | 5.220529    | 2.096884    | 0.000946    | 0           |
| 6.254809    | 5.495786    | 1.692345    | 0.002009    | 0.000703    |
| 7.661119    | 8.212962    | -1.465958   | 0.003053    | 0.000703    |
| 4.923933    | 5.467291    | -1.457361   | 0.000461    | 0           |
| 4.562584    | 4.88155     | -1.247436   | 0.018545    | 0.01988     |
| 8.888425    | 9.28405     | -1.315512   | 0.017979    | 0.01988     |
| 7.130867    | 7.712161    | -1.496191   | 0.003522    | 0.000703    |
| 9.804018    | 10.397675   | -1.509067   | 0.00082     | 0           |
| 7.2474605   | 5.9970265   | 2.3828065   | 0.000059    | 0           |
| 8.071828    | 6.998792    | 2.161926    | 0.000529333 | 0.000047    |
| 9.33949     | 9.670576    | -1.25796    | 0.019482    | 0.01988     |
| 7.897752    | 7.015971    | 1.842648    | 0.000086    | 0           |
| 5.46802     | 4.585071    | 1.844141    | 0.009297    | 0.009809    |
| 5.2334195   | 5.9084825   | -1.6100665  | 0.0016925   | 0.0003515   |
| 9.165397    | 9.823695    | -1.578219   | 0.000151    | 0           |
| 6.3061025   | 5.669868    | 1.554305    | 0.009072    | 0.009809    |
| 7.5556415   | 8.040963    | -1.4000885  | 0.0093925   | 0.0057575   |
| 5.991825    | 4.922541571 | 2.228536714 | 0.000916714 | 0.000243714 |
| 6.370094    | 6.652292    | -1.216046   | 0.025813    | 0.01988     |
| 7.416103    | 8.567458    | -2.221225   | 0.000046    | 0           |
| 8.54127     | 7.786651    | 1.687185    | 0.000051    | 0           |
| 7.54783     | 8.612778    | -2.092095   | 0.000094    | 0           |

|             |             |              |             |             |
|-------------|-------------|--------------|-------------|-------------|
| 6.4947835   | 5.3088525   | 2.402013     | 0.002153    | 0.000853    |
| 6.896005333 | 6.313467333 | 1.512383333  | 0.003579    | 0.003269667 |
| 6.568474    | 7.451388    | -1.844096    | 0.000062    | 0           |
| 6.036731    | 5.2373735   | 1.7461535    | 0.000774    | 0.000141    |
| 5.027444    | 4.437698    | 1.504981     | 0.008574    | 0.009809    |
| 10.042293   | 11.025607   | -1.977001    | 0.000126    | 0           |
| 5.9355115   | 6.2948855   | -1.283682    | 0.002876    | 0.000994    |
| 5.516257    | 6.343537    | -1.774338    | 0.000299    | 0           |
| 6.212757    | 6.700508    | -1.402258    | 0.000561    | 0           |
| 5.208505    | 5.764899333 | -1.470913333 | 0.011766667 | 0.009990333 |
| 5.611845    | 5.992673    | -1.302089    | 0.002326    | 0.000703    |
| 4.4634955   | 5.1687715   | -1.6358015   | 0.0015865   | 0.0003515   |
| 4.6295735   | 5.315531    | -1.613661    | 0.00698     | 0.0049045   |
| 6.735678    | 7.162932    | -1.344672    | 0.002363    | 0.000703    |
| 5.919272    | 6.443351    | -1.438015    | 0.003739    | 0.000703    |
| 7.058836    | 7.557701    | -1.413101    | 0.02446     | 0.01988     |
| 6.329533    | 6.85385     | -1.438253    | 0.000944    | 0           |
| 6.559179    | 6.158145    | 1.320455     | 0.008283    | 0.009809    |
| 4.13805     | 4.93237     | -1.73426     | 0.000184    | 0           |
| 6.762064    | 7.323327    | -1.47556     | 0.022563    | 0.01988     |
| 4.804833    | 4.008611    | 1.736548     | 0.001695    | 0.000703    |
| 3.746615    | 4.14118     | -1.314547    | 0.010812    | 0.004466    |
| 6.098196    | 6.503423    | -1.329612    | 0.001046    | 0.000141    |
| 6.676222    | 5.448822    | 2.3430155    | 0.00003     | 0           |
| 5.83534     | 6.275819    | -1.357054    | 0.008314    | 0.004466    |
| 5.824208    | 6.771783    | -1.928629    | 0.000624    | 0           |
| 5.710501    | 6.304901    | -1.509845    | 0.000545    | 0           |
| 5.644864    | 6.116235    | -1.3964765   | 0.0036705   | 0.002233    |
| 7.211256667 | 7.672596333 | -1.38000667  | 0.018128    | 0.011385    |
| 4.787503    | 5.767885    | -1.972988    | 0.000301    | 0           |
| 4.743432    | 5.041891    | -1.2298315   | 0.0103415   | 0.010081    |
| 5.858112    | 6.678356    | -1.765704    | 0.000169    | 0           |
| 5.912277    | 5.5523155   | 1.283538     | 0.0160385   | 0.01988     |
| 7.611817667 | 8.044093    | -1.349581333 | 0.009389333 | 0.007429667 |
| 5.707155    | 6.285303    | -1.492931    | 0.002096    | 0.000282    |

|          |           |            |           |          |
|----------|-----------|------------|-----------|----------|
| 6.133352 | 6.625411  | -1.406451  | 0.011344  | 0.004466 |
| 6.206056 | 6.850065  | -1.562665  | 0.000028  | 0        |
| 5.31359  | 6.5193925 | -2.3744055 | 0.0001575 | 0        |
| 6.47418  | 7.191765  | -1.644427  | 0.000482  | 0        |
| 5.408523 | 5.85773   | -1.365289  | 0.009472  | 0.004466 |

| Mean Signal of Group Sepsis(GSE28750) | Mean Signal of Group Control(GSE28750) | Fold Change(GSE28750) | p-value(GSE28750) | FDR(GSE28750) |
|---------------------------------------|----------------------------------------|-----------------------|-------------------|---------------|
| 6.58833                               | 7.058423                               | -1.385199             | 0.012036          | 0.003006      |
| 7.947649                              | 7.411685                               | 1.44991               | 0.007441          | 0.003006      |
| 8.4821765                             | 8.00172                                | 1.3990945             | 0.002049          | 0.0003575     |
| 6.786925333                           | 5.0320535                              | 3.834150333           | 0.001117167       | 0.000272333   |
| 7.495813                              | 6.3378655                              | 2.231401              | 0.000503          | 0             |
| 3.607251                              | 4.110076                               | -1.416985             | 0.008487          | 0.001402      |
| 7.8004255                             | 7.1739305                              | 1.554169              | 0.004967          | 0.0017445     |
| 7.845338                              | 7.308845                               | 1.450442              | 0.004032          | 0.001402      |
| 4.4868975                             | 5.7057085                              | -2.3367675            | 0.0003775         | 0             |
| 6.40559                               | 4.352575                               | 5.2443305             | 0.0002605         | 0             |
| 4.916333                              | 4.327145                               | 1.5044                | 0.00079           | 0             |
| 9.033953                              | 7.9996395                              | 2.048183              | 0.007515          | 0.007897      |
| 4.662604                              | 5.2356935                              | -1.5133185            | 0.0086335         | 0.0035955     |
| 9.544091                              | 8.143615                               | 2.639886              | 0.000586          | 0             |
| 5.526499                              | 4.260025                               | 2.405728              | 0.002181          | 0.000232      |
| 5.919855                              | 6.652924                               | -1.6649815            | 0.003091          | 0.000701      |
| 8.6293405                             | 6.85446475                             | 3.47839875            | 0.000133          | 0             |
| 7.374003                              | 7.026563                               | 1.2741395             | 0.011351          | 0.008482      |
| 8.694045333                           | 7.963704333                            | 1.660093667           | 0.012843667       | 0.015813667   |
| 9.394103                              | 7.467431                               | 3.801772              | 0.000554          | 0             |
| 8.642091                              | 7.734125                               | 1.876399              | 0.004612          | 0.001402      |
| 7.732205                              | 7.318465                               | 1.332134              | 0.00879           | 0.007191      |
| 8.856557                              | 8.238908                               | 1.534374              | 0.003421          | 0.000483      |
| 6.30586                               | 7.045039                               | -1.669226             | 0.00302           | 0.000232      |
| 9.411892                              | 7.703796                               | 3.267292              | 0.000618          | 0             |
| 7.658268                              | 8.318696                               | -1.580552             | 0.0039            | 0.000232      |
| 4.129118                              | 4.471342                               | -1.267709             | 0.015854          | 0.007191      |
| 4.731024                              | 4.220831                               | 1.424241              | 0.022806          | 0.031647      |
| 5.6492465                             | 6.281516                               | -1.5510015            | 0.009495          | 0.0035955     |
| 8.885294                              | 9.646716                               | -1.695161             | 0.003716          | 0.000232      |
| 7.510286                              | 6.905883                               | 1.52035               | 0.000597          | 0             |
| 7.21854                               | 7.701086                               | -1.397207             | 0.001388          | 0             |
| 8.078458                              | 8.615813                               | -1.451309             | 0.020121          | 0.007191      |

|             |             |              |             |             |
|-------------|-------------|--------------|-------------|-------------|
| 7.264498    | 6.090069    | 2.257036     | 0.000019    | 0           |
| 9.7841375   | 8.1389555   | 3.206094     | 0.000058    | 0           |
| 11.448166   | 7.440782    | 16.082103    | 0.000018    | 0           |
| 5.991652    | 6.396536    | -1.323982    | 0.004843    | 0.000483    |
| 7.20097     | 6.48713     | 1.6427475    | 0.0021895   | 0.000701    |
| 8.9301732   | 8.451218    | 1.3989436    | 0.0170892   | 0.0210276   |
| 6.299138    | 7.595827    | -2.456645    | 0.000243    | 0           |
| 5.989148    | 4.004499    | 10.32821567  | 0.007216667 | 0.004794    |
| 5.284681667 | 4.740061333 | 1.464455667  | 0.010664    | 0.010535667 |
| 5.860637    | 6.389589667 | -1.458143667 | 0.014632333 | 0.007661667 |
| 6.237289    | 6.7416295   | -1.418939    | 0.004527    | 0.000483    |
| 7.94529     | 6.781738    | 2.240083     | 0.000202    | 0           |
| 8.5720105   | 7.784503    | 1.726492     | 0.003473    | 0.0009425   |
| 10.782799   | 10.295842   | 1.401486     | 0.007567    | 0.003006    |
| 6.289773    | 5.833556667 | 1.373987     | 0.009963    | 0.007191    |
| 10.17345633 | 9.523551    | 1.574023667  | 0.011544    | 0.009981333 |
| 5.416908222 | 3.862915667 | 3.543403222  | 0.002821111 | 0.003567889 |
| 6.2529938   | 6.8388302   | -1.5069464   | 0.002856    | 0.0003268   |
| 7.870107    | 7.372261    | 1.412103     | 0.004219    | 0.001402    |
| 7.4224225   | 5.593108667 | 3.640643667  | 0.000120333 | 0           |
| 7.022462    | 5.830442    | 2.326462     | 0.000309    | 0           |
| 6.352298    | 7.343418667 | -2.010136    | 0.016317333 | 0.010374667 |
| 5.121716333 | 5.769449667 | -1.576310667 | 0.006030333 | 0.001079333 |
| 9.227126    | 8.727       | 1.4224232    | 0.0149348   | 0.0145936   |
| 8.180039667 | 6.358462    | 3.698161     | 0.000713    | 7.73333E-05 |
| 5.537605    | 3.82649     | 3.274139     | 0.000875    | 0           |
| 6.7582795   | 5.3754425   | 3.077332     | 0.001711    | 0.0002415   |
| 7.587521    | 8.090025    | -1.41667     | 0.01078     | 0.003006    |
| 6.535471    | 5.241776667 | 2.483091167  | 0.000536333 | 3.86667E-05 |
| 7.745063333 | 8.613257    | -1.829851333 | 0.000335333 | 0           |
| 7.984137    | 7.238697    | 1.676485     | 0.000048    | 0           |
| 5.782263667 | 4.242046667 | 3.222111     | 0.005218333 | 0.005187333 |
| 10.927371   | 9.508977667 | 2.68582      | 0.005793333 | 0.005187333 |
| 6.1219545   | 6.6740955   | -1.467091    | 0.014341    | 0.0050985   |
| 4.15792875  | 4.8210645   | -1.595637    | 0.010668    | 0.004299    |

|             |             |              |             |             |
|-------------|-------------|--------------|-------------|-------------|
| 6.808638    | 5.961382    | 1.799077     | 0.000956    | 0           |
| 10.406776   | 9.046234    | 2.567815     | 0.00002     | 0           |
| 7.130236    | 5.475224    | 4.678203     | 0.008259    | 0.007781    |
| 5.639081    | 6.151074    | -1.426019    | 0.044463    | 0.031647    |
| 9.15556     | 8.644517    | 1.4277565    | 0.0044205   | 0.0017445   |
| 4.0104965   | 5.009082    | -2.0797635   | 0.002765    | 0.0002415   |
| 4.9178305   | 5.3642465   | -1.372394    | 0.0023895   | 0.000116    |
| 7.295311    | 8.44779     | -2.2806715   | 0.0008595   | 0           |
| 6.554052    | 7.895522    | -2.568731    | 0.010669    | 0.002204    |
| 7.37334475  | 8.1102925   | -1.66902475  | 0.011587    | 0.00802775  |
| 7.371281    | 8.298834    | -1.902047    | 0.000556    | 0           |
| 6.1853675   | 5.6451815   | 1.460338     | 0.004595    | 0.0017445   |
| 10.453107   | 11.025647   | -1.48714     | 0.005154    | 0.000483    |
| 6.7566445   | 7.362271    | -1.530586    | 0.003216    | 0.0002415   |
| 6.883506333 | 7.534105667 | -1.591891667 | 0.002596333 | 0.000467333 |
| 10.782194   | 9.860506    | 1.894331     | 0.000184    | 0           |
| 5.332263    | 5.9034775   | -1.48764     | 0.0227135   | 0.0159395   |
| 6.674282    | 5.205192    | 2.768472     | 0.002485    | 0.000483    |
| 7.393289667 | 7.806935    | -1.333859    | 0.022573    | 0.015343    |
| 9.669542    | 7.926534    | 3.347323     | 0.000029    | 0           |
| 6.703016    | 5.056353    | 3.131085     | 0.000959    | 0           |
| 5.8788625   | 4.59296     | 2.6041865    | 0.0002725   | 0           |
| 8.9568915   | 6.711671    | 4.9288155    | 0.0000405   | 0           |
| 10.617309   | 9.522276    | 2.136179     | 0.003314    | 0.000483    |
| 6.67314625  | 8.0360425   | -2.58281375  | 0.00184575  | 0.000058    |
| 9.1466715   | 8.3213815   | 1.7722265    | 0.0022825   | 0.000701    |
| 9.498317    | 8.119017    | 2.601421     | 0.000022    | 0           |
| 6.211390333 | 5.348137333 | 1.823944333  | 0.003760667 | 0.001240333 |
| 9.719875    | 8.011569    | 3.26777      | 0.000025    | 0           |
| 4.549316    | 5.999423    | -3.23068     | 0.000925    | 0           |
| 8.9366965   | 8.4249135   | 1.426226     | 0.0128025   | 0.009284    |
| 4.518655    | 5.424233    | -1.873295    | 0.001704    | 0           |
| 5.088621    | 4.487741    | 1.518613     | 0.003023    | 0.000701    |
| 7.075183    | 8.354345    | -2.42698     | 0.000021    | 0           |
| 7.2425915   | 6.227984    | 2.116487     | 0.011564    | 0.0159395   |

|             |             |              |             |             |
|-------------|-------------|--------------|-------------|-------------|
| 6.906507    | 7.523915    | -1.534116    | 0.000069    | 0           |
| 5.3394535   | 6.4906815   | -2.2589875   | 0.0004515   | 0           |
| 6.589623    | 7.776539    | -2.276655    | 0.000247    | 0           |
| 10.979723   | 10.56231    | 1.33553      | 0.02759     | 0.031647    |
| 6.8750155   | 7.568246    | -1.619131    | 0.00087     | 0           |
| 4.77323     | 7.494865    | -6.5962      | 0.000152    | 0           |
| 7.607354333 | 5.509530667 | 4.294978     | 0.000153333 | 0           |
| 11.224298   | 5.49747     | 52.959871    | 0.000018    | 0           |
| 7.143936    | 8.735003    | -3.01272     | 0.000037    | 0           |
| 8.428824    | 9.119957    | -1.614551    | 0.00591     | 0.000483    |
| 11.21645567 | 9.515696667 | 3.2555       | 0.000688    | 7.73333E-05 |
| 12.219826   | 10.713407   | 2.841038     | 0.000024    | 0           |
| 7.943771    | 7.316808    | 1.5446175    | 0.009835    | 0.007191    |
| 4.296984    | 5.0740365   | -1.727142    | 0.004137    | 0.0003575   |
| 2.810608    | 2.467464    | 1.268518     | 0.008582    | 0.007191    |
| 9.5354415   | 8.4969625   | 2.085363     | 0.005626    | 0.00796975  |
| 9.859105    | 10.543761   | -1.607318    | 0.003783    | 0.000232    |
| 5.836696    | 6.410166    | -1.4954145   | 0.0007995   | 0           |
| 8.130778    | 6.1353905   | 4.0058695    | 0.0000315   | 0           |
| 8.36973     | 7.721514    | 1.567229     | 0.000654    | 0           |
| 6.32277     | 7.113032    | -1.729388    | 0.001404    | 0           |
| 6.479161    | 7.581847    | -2.147541    | 0.000026    | 0           |
| 8.119753667 | 6.586340333 | 2.920908333  | 0.000647333 | 0           |
| 5.959941    | 6.269988    | -1.239753    | 0.0222535   | 0.009284    |
| 5.488682    | 6.681553    | -2.286072    | 0.000042    | 0           |
| 10.341846   | 8.135157    | 4.632359     | 0.000022    | 0           |
| 9.5798545   | 5.72242     | 14.6422575   | 0.000018    | 0           |
| 12.0975     | 11.334999   | 1.696429     | 0.000111    | 0           |
| 4.739046    | 5.8070085   | -2.1381345   | 0.000278    | 0           |
| 7.955962    | 8.7987835   | -1.8058515   | 0.001541    | 0           |
| 7.482531667 | 8.176242    | -1.617629667 | 0.004578333 | 0.001002    |
| 3.407712    | 3.828961    | -1.339087    | 0.046336    | 0.031647    |
| 7.3152845   | 6.701594    | 1.533214     | 0.0036355   | 0.001503    |
| 6.456773    | 6.926709    | -1.385048    | 0.001145    | 0           |
| 5.9686375   | 4.9202445   | 2.108087     | 0.0018005   | 0.0002415   |



|             |             |              |             |             |
|-------------|-------------|--------------|-------------|-------------|
| 7.923015167 | 6.278919833 | 3.3782145    | 0.0021985   | 0.002593667 |
| 8.370281    | 8.836041    | -1.381045    | 0.005288    | 0.000483    |
| 7.4157785   | 7.93217     | -1.4423465   | 0.021362    | 0.0173265   |
| 6.3450082   | 7.0515506   | -1.6811878   | 0.0064004   | 0.0018616   |
| 7.335769    | 7.937701    | -1.517748    | 0.022608    | 0.015562    |
| 7.593799    | 6.4010625   | 2.365516     | 0.0031205   | 0.000483    |
| 8.603074    | 6.890151667 | 3.635283333  | 0.00091     | 7.73333E-05 |
| 8.2515345   | 8.90447     | -1.5729385   | 0.0016375   | 0           |
| 12.666703   | 10.432467   | 4.705133     | 0.000018    | 0           |
| 4.95943     | 5.6601      | -1.625259    | 0.006684    | 0.001402    |
| 9.927915667 | 9.459177    | 1.387064333  | 0.018702667 | 0.018133333 |
| 4.995659    | 5.416809    | -1.338994    | 0.011641    | 0.003006    |
| 7.818007    | 6.744916    | 2.103936     | 0.000038    | 0           |
| 5.8801605   | 6.5208855   | -1.5654335   | 0.012869    | 0.0080225   |
| 7.18857     | 7.5741935   | -1.306453    | 0.006449    | 0.001503    |
| 5.6251975   | 6.31495725  | -1.68104475  | 0.00352575  | 0.00047125  |
| 7.618128    | 8.220231667 | -1.51867     | 0.004801333 | 0.000628333 |
| 8.53390575  | 5.958925    | 7.452266     | 0.00441325  | 0.0038905   |
| 7.360156    | 8.067069    | -1.632308    | 0.017038    | 0.007191    |
| 12.261113   | 9.477844    | 6.884105     | 0.000018    | 0           |
| 4.2172935   | 3.283572    | 1.9112305    | 0.0009265   | 0           |
| 6.79735     | 5.179417    | 3.069349     | 0.001799    | 0.000232    |
| 6.916424667 | 4.130993    | 7.063528     | 2.83333E-05 | 0           |
| 4.184812    | 4.561818    | -1.2986935   | 0.018946    | 0.009284    |
| 4.613468    | 5.8633155   | -2.37825     | 0.0012555   | 0           |
| 6.856653    | 7.292425    | -1.352634    | 0.004004    | 0.000232    |
| 6.4940565   | 6.201252    | 1.2251255    | 0.016633    | 0.0236045   |
| 8.552242    | 6.853977    | 3.252642     | 0.000049    | 0           |
| 6.770843    | 5.397612    | 2.590501     | 0.000067    | 0           |
| 9.739922    | 10.165253   | -1.34289     | 0.014701    | 0.0050985   |
| 6.31482825  | 7.175777    | -1.84553825  | 0.00394775  | 0.0007515   |
| 6.801143    | 7.967374    | -2.284806    | 0.0000955   | 0           |
| 7.37495     | 7.835479333 | -1.378409667 | 0.002273333 | 0.000161    |
| 6.119604    | 6.795651    | -1.597756    | 0.00554     | 0.000483    |
| 5.284161    | 5.801656    | -1.431468    | 0.011535    | 0.003006    |

|             |             |              |             |             |
|-------------|-------------|--------------|-------------|-------------|
| 8.469216    | 7.815639    | 1.573064     | 0.001478    | 0           |
| 6.842809    | 5.7161805   | 2.200477     | 0.0011715   | 0.000116    |
| 5.991438333 | 6.597958333 | -1.535495    | 0.002516667 | 0.000467333 |
| 6.646043    | 5.495667    | 2.235053     | 0.000186    | 0           |
| 6.468594    | 7.241726333 | -1.726995    | 0.001265667 | 7.73333E-05 |
| 4.647848    | 3.828528333 | 1.772408     | 0.004709333 | 0.002558    |
| 3.904515    | 4.400598    | -1.410379    | 0.033485    | 0.031647    |
| 5.8814055   | 5.111674    | 1.734379     | 0.0019775   | 0.000232    |
| 7.623596    | 7.21863     | 1.324058     | 0.012981    | 0.015562    |
| 7.668771667 | 7.083359    | 1.505370667  | 0.00452     | 0.002864333 |
| 8.634065    | 7.925508    | 1.634169     | 0.001134    | 0           |
| 7.313331    | 8.026528    | -1.639434    | 0.000115    | 0           |
| 6.030553    | 6.407073    | -1.298831    | 0.008566    | 0.0017445   |
| 9.3493945   | 8.6710605   | 1.602724     | 0.004392    | 0.001619    |
| 8.372017    | 6.304532    | 4.191556     | 0.000155    | 0           |
| 6.847347    | 5.575445    | 2.420037333  | 0.003694667 | 0.001163    |
| 8.486431    | 6.982116    | 2.8369       | 0.000128    | 0           |
| 5.86354225  | 7.3266135   | -2.890617    | 0.00029875  | 0           |
| 10.748395   | 9.311407    | 2.707549     | 0.000034    | 0           |
| 7.661792    | 6.453132    | 2.311229     | 0.00067     | 0           |
| 7.734666    | 8.073051    | -1.26434     | 0.033974    | 0.031647    |
| 7.156084    | 7.6593505   | -1.4174895   | 0.0030555   | 0.000232    |
| 6.876758    | 6.352531    | 1.447554     | 0.0031555   | 0.000817    |
| 6.7163195   | 7.2894875   | -1.4878265   | 0.0064385   | 0.001503    |
| 9.904761    | 10.767172   | -1.818074    | 0.007099    | 0.001402    |
| 7.777581    | 6.541857    | 2.393779667  | 0.001567333 | 0.000238333 |
| 5.02472025  | 5.66384675  | -1.560527    | 0.00491525  | 0.00052925  |
| 6.428623    | 7.082580667 | -1.5763      | 0.003721    | 0.000544667 |
| 7.6176135   | 6.3542155   | 2.4884265    | 0.0000945   | 0           |
| 10.079724   | 9.632737    | 1.363191     | 0.013062    | 0.015562    |
| 5.341626667 | 6.052656    | -1.664756    | 0.002397    | 0.000161    |
| 6.785831    | 5.324583    | 2.753465     | 0.001047    | 0           |
| 6.28449     | 7.168819333 | -1.893193667 | 0.001855    | 7.73333E-05 |
| 6.5483505   | 5.876163    | 1.603011     | 0.012155    | 0.0113765   |
| 5.080241    | 4.700581    | 1.301035     | 0.022055    | 0.031647    |

|             |             |             |             |             |
|-------------|-------------|-------------|-------------|-------------|
| 6.731326    | 7.955819    | -2.336733   | 0.000038    | 0           |
| 6.244134333 | 5.352679333 | 1.917272    | 0.008658    | 0.010626333 |
| 7.363811    | 5.9302525   | 2.7247185   | 0.0009015   | 0.000116    |
| 8.012332667 | 6.512603667 | 2.884696    | 0.000206667 | 0           |
| 5.395577333 | 4.700651667 | 1.636957    | 0.008965    | 0.010374667 |
| 7.970974333 | 6.233506667 | 3.404431667 | 8.96667E-05 | 0           |
| 5.333724    | 5.069368    | 1.2011      | 0.01624     | 0.015562    |
| 6.885688333 | 5.725136667 | 2.310202333 | 0.000483667 | 0           |
| 4.9484955   | 3.9680595   | 1.999436    | 0.000953    | 0           |
| 4.7691835   | 5.941669    | -2.286393   | 0.001447    | 0           |
| 5.367526    | 6.062963    | -1.619375   | 0.010904    | 0.003006    |
| 4.325288    | 4.028569    | 1.228347    | 0.007758    | 0.003006    |
| 7.937853    | 7.17945     | 1.691618    | 0.000773    | 0           |
| 7.205171    | 6.4525755   | 1.6871955   | 0.007176    | 0.0042965   |
| 7.9540635   | 6.886927    | 2.157284    | 0.00076     | 0           |
| 5.625767    | 6.818669    | -2.286121   | 0.000113    | 0           |
| 5.99241     | 5.295469    | 1.621065    | 0.003165    | 0.000483    |
| 3.08092     | 3.434633    | -1.277845   | 0.017922    | 0.007191    |
| 7.871718    | 6.136474    | 3.329358    | 0.000075    | 0           |
| 4.610653    | 5.310111    | -1.623895   | 0.000257    | 0           |
| 4.257892    | 5.016996    | -1.692438   | 0.000376    | 0           |
| 5.512017    | 5.851728    | -1.265503   | 0.004985    | 0.000483    |
| 8.3501325   | 7.802389    | 1.468231    | 0.0156615   | 0.019419    |
| 7.566258125 | 6.620271125 | 1.950573875 | 0.000837875 | 0.000058    |
| 5.9160865   | 5.0983925   | 1.7989595   | 0.0044035   | 0.00267     |
| 6.9714938   | 5.384205    | 3.1529596   | 0.0007152   | 0.0000464   |
| 5.009378    | 8.433791    | -10.736211  | 0.000223    | 0           |
| 12.480463   | 10.940728   | 2.9111145   | 0.0000395   | 0           |
| 5.244872    | 5.604409    | -1.283014   | 0.024855    | 0.015562    |
| 7.3776545   | 9.94118     | -5.9126685  | 0.000019    | 0           |
| 7.304255    | 5.836263    | 2.766367    | 0.000407    | 0           |
| 9.261753    | 8.590536    | 1.592416    | 0.002018    | 0.000232    |
| 6.531374    | 8.772833    | -4.72875    | 0.001543    | 0           |
| 7.0854748   | 6.1889898   | 1.9151804   | 0.0118268   | 0.0109766   |
| 9.569088    | 10.581489   | -2.017266   | 0.004229    | 0.000483    |

|             |             |              |             |             |
|-------------|-------------|--------------|-------------|-------------|
| 10.795688   | 9.882886    | 1.882698     | 0.000944    | 0           |
| 4.33148     | 4.8225545   | -1.414174    | 0.0009885   | 0           |
| 8.900562667 | 7.147656667 | 3.472165333  | 0.001894333 | 0.000467333 |
| 6.165989    | 5.20245     | 1.950087     | 0.000965    | 0           |
| 8.59180875  | 7.66965775  | 1.9413135    | 0.00581425  | 0.00796975  |
| 10.683898   | 9.960274    | 1.651325     | 0.003758    | 0.001402    |
| 5.523891    | 4.965007    | 1.47313      | 0.001954    | 0.000232    |
| 5.8546495   | 7.4999175   | -3.3732415   | 0.000022    | 0           |
| 4.745138    | 5.9267505   | -2.313615    | 0.006977    | 0.0035955   |
| 4.51224     | 5.274623    | -1.70326     | 0.000548667 | 0           |
| 6.087742    | 6.902559    | -1.759076    | 0.000036    | 0           |
| 9.307082    | 7.043102    | 4.803147     | 0.000368    | 0           |
| 7.2232945   | 6.1817435   | 2.1202745    | 0.001514    | 0.000116    |
| 7.616545333 | 8.300974667 | -1.614515    | 0.005871667 | 0.001163    |
| 6.918886857 | 7.797737429 | -1.869132429 | 0.002045714 | 0.000429429 |
| 4.445565    | 5.73933     | -2.45167     | 0.000115    | 0           |
| 5.681698333 | 6.314381333 | -1.554816    | 0.007043333 | 0.002474333 |
| 9.351024    | 6.277619    | 8.417576     | 0.000019    | 0           |
| 8.319645    | 6.612083    | 3.266084     | 0.000026    | 0           |
| 12.978202   | 12.0921922  | 1.8483634    | 0.000342    | 0.0000464   |
| 8.3653492   | 6.9893442   | 2.6273762    | 0.0002646   | 0           |
| 6.378722    | 6.722931    | -1.269455    | 0.010756    | 0.003006    |
| 7.639588    | 6.591695    | 2.067508     | 0.000194    | 0           |
| 7.256956    | 7.995496    | -1.668487    | 0.004035    | 0.000232    |
| 6.0808675   | 5.187901    | 1.8849275    | 0.0008625   | 0           |
| 5.90993     | 4.211694    | 3.24504      | 0.000115    | 0           |
| 8.759326    | 10.147702   | -2.617837    | 0.000916    | 0           |
| 4.284572    | 3.80615     | 1.39322      | 0.003774    | 0.001402    |
| 8.752049    | 8.0832655   | 1.5976725    | 0.003496    | 0.001503    |
| 11.756956   | 11.098093   | 1.578838     | 0.0005      | 0           |
| 5.881068    | 6.892748    | -2.016258    | 0.00009     | 0           |
| 8.21334     | 11.032723   | -7.0605485   | 0.000093    | 0           |
| 6.729287    | 7.150376    | -1.338938    | 0.004119    | 0.000483    |
| 4.936184    | 5.90826     | -1.961661    | 0.000077    | 0           |
| 5.283541    | 5.839707    | -1.470357    | 0.017608    | 0.007191    |

|                   |                  |                  |                  |           |
|-------------------|------------------|------------------|------------------|-----------|
| 7.0042175         | 7.4950985        | -1.4059615       | 0.0042375        | 0.0003575 |
| 6.707635          | 7.541716         | -1.784216        | 0.007938         | 0.0017445 |
| 9.068229          | 7.080144         | 3.9671           | 0.000737         | 0         |
| 6.739821          | 8.684755         | -3.8502          | 0.00003          | 0         |
| 8.976883          | 4.99586          | 15.790918        | 0.000018         | 0         |
| 7.566549          | 6.9469645        | 1.547295         | 0.01046          | 0.0159395 |
| 3.325572          | 4.200317         | -1.833683        | 0.003938         | 0.000232  |
| 6.9382095         | 4.87553875       | 4.838976         | 0.000044         | 0         |
| 9.000273          | 8.057824         | 1.921788         | 0.001133         | 0         |
| 6.325738          | 7.296876         | -1.960386        | 0.000405         | 0         |
| 5.683059          | 6.8250245        | -2.2700565       | 0.0009755        | 0         |
| 7.321587          | 8.110759         | -1.728088        | 0.000061         | 0         |
| <b>11.5210715</b> | <b>8.5480045</b> | <b>7.8559415</b> | <b>0.0000195</b> | <b>0</b>  |
| 7.651207          | 9.463026         | -3.510846        | 0.004821         | 0.000483  |
| 7.0440695         | 7.5583635        | -1.428918        | 0.020825         | 0.0113765 |
| 10.191051         | 9.84157          | 1.274102         | 0.018524         | 0.015562  |
| 6.675863          | 6.224848         | 1.367002         | 0.020117         | 0.031647  |
| 5.537071          | 6.287741         | -1.682574        | 0.00032          | 0         |
| 9.002934          | 7.985149         | 2.024808         | 0.00027          | 0         |
| 5.417197          | 6.318993         | -1.86839         | 0.009063         | 0.001402  |
| 3.886539          | 3.505985         | 1.301842         | 0.014888         | 0.015562  |
| 5.5092318         | 3.8442766        | 4.1338638        | 0.0039416        | 0.0031588 |
| 8.45995           | 7.48024          | 1.972069         | 0.001998         | 0.000232  |
| 8.126272          | 7.275961         | 1.802889         | 0.013514         | 0.015562  |
| 8.754981          | 7.3921625        | 2.590597         | 0.0020535        | 0.0002415 |
| 6.1558295         | 5.133924         | 2.109856         | 0.0115995        | 0.009284  |
| 5.988709          | 6.779372         | -1.7326          | 0.0022985        | 0.0002415 |
| 8.389868          | 7.06505          | 2.505013         | 0.000202         | 0         |
| 10.931347         | 8.492121         | 5.423507         | 0.000018         | 0         |
| 5.025167          | 6.168204         | -2.208454        | 0.000022         | 0         |
| 7.642385          | 9.441639         | -3.480402        | 0.000055         | 0         |
| 7.0357            | 8.875064         | -3.578522        | 0.000019         | 0         |
| 5.797545          | 7.197538         | -2.639004        | 0.000029         | 0         |
| 6.507615          | 8.0415182        | -2.9342598       | 0.0008032        | 0         |
| 9.3806955         | 11.330646        | -3.8702655       | 0.0001595        | 0         |

|             |             |              |             |             |
|-------------|-------------|--------------|-------------|-------------|
| 10.987502   | 8.680583    | 4.948253     | 0.000126    | 0           |
| 8.793369333 | 9.378087667 | -1.503492    | 0.010804    | 0.003476333 |
| 6.390416    | 7.058843333 | -1.611722    | 0.013488333 | 0.011016333 |
| 7.015889    | 7.7010575   | -1.6079115   | 0.015467    | 0.007897    |
| 5.946239    | 6.370473    | -1.341859    | 0.032774    | 0.031647    |
| 6.606229    | 7.533538    | -1.91127375  | 0.001234    | 0           |
| 6.871721333 | 7.507064667 | -1.554600333 | 0.006125333 | 0.001012    |
| 7.937377    | 8.718954    | -1.7190495   | 0.0026845   | 0.0002415   |
| 7.403413667 | 7.785883667 | -1.304634333 | 0.025278667 | 0.013948    |
| 7.276647    | 8.060505    | -1.721729    | 0.000603    | 0           |
| 10.631847   | 5.750765    | 29.8013735   | 0.000018    | 0           |
| 9.351791    | 10.001292   | -1.57097     | 0.007564    | 0.001503    |
| 6.78690625  | 4.33478625  | 5.93529525   | 0.00032475  | 0           |
| 9.112773    | 8.064021    | 2.06874      | 0.000647    | 0           |
| 4.550169    | 4.233911    | 1.245097     | 0.001765    | 0.000232    |
| 6.81369     | 6.018644    | 1.735133     | 0.001035    | 0           |
| 5.451811    | 6.846463    | -2.629252    | 0.000097    | 0           |
| 9.398476333 | 8.442345333 | 1.952872667  | 0.002042333 | 0.000322    |
| 8.95731     | 9.58109     | -1.540907    | 0.014815    | 0.007191    |
| 7.909665    | 9.242362    | -2.51873     | 0.000025    | 0           |
| 7.434335    | 6.265675    | 2.248028     | 0.001446    | 0           |
| 8.848511    | 7.768964    | 2.113373     | 0.001072    | 0           |
| 6.174502    | 8.447924    | -4.834685    | 0.002785    | 0.000232    |
| 10.632453   | 10.107893   | 1.438495     | 0.014687    | 0.015562    |
| 8.138439    | 7.2680495   | 1.851668     | 0.003118    | 0.000817    |
| 6.789081    | 7.961147    | -2.253341    | 0.000113    | 0           |
| 8.238477    | 5.302651    | 7.65194      | 0.000375    | 0           |
| 11.285713   | 9.297548    | 3.967323     | 0.000043    | 0           |
| 7.905515    | 5.882168    | 4.065257     | 0.000091    | 0           |
| 12.093648   | 8.692635    | 10.686919    | 0.0000405   | 0           |
| 9.323355    | 8.433938    | 1.852427     | 0.002388    | 0.000483    |
| 8.7333145   | 10.9706295  | -4.7187145   | 0.0000995   | 0           |
| 4.292554    | 3.478743    | 1.7710585    | 0.0043475   | 0.001503    |
| 5.535647    | 5.9135      | -1.299407    | 0.01735     | 0.007191    |
| 5.664107    | 4.403534333 | 2.767342333  | 0.002466667 | 0.001002    |

|             |             |              |             |             |
|-------------|-------------|--------------|-------------|-------------|
| 8.596190333 | 5.776000333 | 7.308165667  | 2.03333E-05 | 0           |
| 8.782917    | 7.904897    | 1.8634965    | 0.0089045   | 0.0080225   |
| 8.847671    | 10.091467   | -2.369048    | 0.000362    | 0           |
| 5.47627275  | 6.74207475  | -2.42323575  | 0.0107465   | 0.0045915   |
| 5.7713825   | 4.250508    | 2.9176625    | 0.0013645   | 0.0002415   |
| 10.648746   | 8.976589    | 3.186908     | 0.000026    | 0           |
| 6.11092375  | 7.0882785   | -2.098198    | 0.00198475  | 0.0003505   |
| 6.410713    | 5.677393    | 1.66246      | 0.00169     | 0.000232    |
| 6.633235    | 6.052207    | 1.495915     | 0.01164     | 0.007191    |
| 5.768732    | 5.394641    | 1.296023     | 0.002121    | 0.000232    |
| 5.663559    | 4.3633535   | 2.4710385    | 0.0010455   | 0.000116    |
| 7.6529745   | 8.4170055   | -1.7030415   | 0.003349    | 0.0007515   |
| 6.841298667 | 5.560491333 | 2.439760333  | 0.001989    | 0.000467333 |
| 6.586423    | 7.325957    | -1.669636    | 0.002255    | 0           |
| 5.33844     | 3.7601405   | 3.643761     | 0.0017775   | 0.0002415   |
| 6.798025    | 6.414074    | 1.304911     | 0.007467    | 0.003006    |
| 6.096279    | 7.469757    | -2.590945    | 0.000078    | 0           |
| 8.8012855   | 9.353248    | -1.4720445   | 0.0126655   | 0.007781    |
| 5.284741    | 6.397857    | -2.163123    | 0.000037    | 0           |
| 8.318981    | 7.465188    | 1.815353333  | 0.000970667 | 7.73333E-05 |
| 7.917249    | 8.537703    | -1.537358    | 0.002137    | 0           |
| 6.723637    | 7.01463     | -1.223482    | 0.040241    | 0.031647    |
| 5.755987667 | 4.673232333 | 2.13637      | 0.001895    | 0.000238333 |
| 5.911526    | 5.403165    | 1.428744333  | 0.006975667 | 0.004794    |
| 8.073529667 | 6.100802667 | 3.937543333  | 2.43333E-05 | 0           |
| 6.5170675   | 5.944745    | 1.4869715    | 0.001542    | 0.0002415   |
| 4.66107     | 5.539984    | -1.838991    | 0.002005    | 0           |
| 5.3465965   | 5.88765825  | -1.46406475  | 0.0044995   | 0.000701    |
| 4.486139    | 4.05116     | 1.351966     | 0.0081435   | 0.007781    |
| 6.7177435   | 6.0185945   | 1.63606125   | 0.00881325  | 0.00815325  |
| 5.0828895   | 5.86309875  | -1.73236325  | 0.00310825  | 0.0007515   |
| 7.242841    | 9.277452    | -4.097123    | 0.000235    | 0           |
| 6.365979333 | 7.302573    | -1.931844333 | 0.008026    | 0.002635333 |
| 6.2599845   | 5.7853445   | 1.38960875   | 0.00503175  | 0.0038905   |
| 5.164657    | 5.806492    | -1.560312    | 0.003499    | 0.000232    |

|             |             |              |             |             |
|-------------|-------------|--------------|-------------|-------------|
| 5.331681    | 5.904174    | -1.487091    | 0.000816    | 0           |
| 7.9634325   | 7.1891375   | 1.724318     | 0.006267    | 0.0037115   |
| 10.253587   | 9.6633      | 1.505546     | 0.000675    | 0           |
| 10.318041   | 9.170461    | 2.2161015    | 0.0000895   | 0           |
| 7.025603    | 6.161135    | 1.820668     | 0.025309    | 0.031647    |
| 4.71722     | 5.428645    | -1.637421    | 0.003364    | 0.000232    |
| 8.1710295   | 7.3413625   | 1.796512     | 0.002712    | 0.000701    |
| 12.094117   | 10.314711   | 3.432848     | 0.000029    | 0           |
| 6.2428715   | 5.214178    | 2.2050105    | 0.013182    | 0.0158235   |
| 7.7658545   | 8.620587    | -1.808485    | 0.003511    | 0.000701    |
| 12.267577   | 10.921767   | 2.541729     | 0.000047    | 0           |
| 7.1201575   | 6.3573585   | 1.737707667  | 0.007312167 | 0.0070545   |
| 4.931448    | 5.582292667 | -1.580481333 | 0.009480667 | 0.005187333 |
| 7.834215    | 6.265890667 | 3.211908     | 0.001721667 | 0.000161    |
| 6.854747    | 5.0223045   | 3.58408325   | 0.00014375  | 0           |
| 5.591562    | 6.412991    | -1.767155    | 0.003274    | 0.000232    |
| 7.954866    | 6.630378    | 2.504441     | 0.000277    | 0           |
| 8.371394    | 7.308309    | 2.089394     | 0.000347    | 0           |
| 7.457134    | 8.85371     | -2.632759    | 0.000377    | 0           |
| 9.801027    | 8.228169    | 2.974934     | 0.000045    | 0           |
| 8.700401    | 9.222578    | -1.436122    | 0.032143    | 0.031647    |
| 6.759203    | 6.267769333 | 1.418334667  | 0.012106    | 0.011551    |
| 5.917479667 | 5.222739333 | 1.641651     | 0.004758667 | 0.005187333 |
| 4.780167    | 2.845488    | 3.822929     | 0.000437    | 0           |
| 11.550974   | 10.545945   | 2.006984     | 0.000716    | 0           |
| 7.854621    | 6.756340333 | 2.174542     | 0.000958    | 7.73333E-05 |
| 6.884123333 | 7.504592333 | -1.547680667 | 0.010377333 | 0.005348333 |
| 5.6732225   | 6.257227    | -1.522202    | 0.0058815   | 0.001503    |
| 5.396762    | 6.1602645   | -1.725166    | 0.002582    | 0.00017875  |
| 8.421005    | 9.875759    | -2.741097    | 0.000884    | 0           |
| 3.816779    | 4.236442    | -1.3401115   | 0.0286395   | 0.019419    |
| 9.0919515   | 8.46539     | 1.556534     | 0.0153405   | 0.0165245   |
| 7.033715    | 6.153814    | 1.8677105    | 0.000098    | 0           |
| 5.361466    | 6.425222    | -2.324354    | 0.001502    | 0.000116    |
| 7.20574     | 7.8008      | -1.510535    | 0.003837    | 0.000232    |



|             |             |              |             |             |
|-------------|-------------|--------------|-------------|-------------|
| 8.102076    | 7.646783    | 1.371061     | 0.001431    | 0           |
| 4.5884485   | 4.003633    | 1.531953     | 0.009722    | 0.0158235   |
| 10.125978   | 9.138238    | 1.983075     | 0.000386    | 0           |
| 6.537991    | 4.7960605   | 3.8183655    | 0.0018975   | 0.000701    |
| 3.923975    | 4.497035    | -1.5191525   | 0.01235     | 0.007897    |
| 9.386748333 | 7.663183667 | 3.303014667  | 0.000192667 | 0           |
| 5.847394    | 6.313437    | -1.3894655   | 0.017944    | 0.0158235   |
| 8.52195     | 8.226312    | 1.227428     | 0.021662    | 0.031647    |
| 8.872204    | 7.810246    | 2.087762     | 0.000375    | 0           |
| 7.825626    | 8.117268    | -1.224033    | 0.038811    | 0.031647    |
| 12.336122   | 7.860888    | 22.242291    | 0.000018    | 0           |
| 7.684250333 | 6.12874     | 3.132118     | 0.004956    | 0.005348333 |
| 8.1010048   | 6.6570668   | 2.7688392    | 0.0002518   | 0           |
| 8.781025    | 9.31338     | -1.4481055   | 0.016202    | 0.008482    |
| 6.91048925  | 5.57545675  | 2.737857     | 0.00665725  | 0.00791175  |
| 5.61314125  | 6.38802625  | -1.730313    | 0.0034445   | 0.0004085   |
| 4.517827    | 5.197233    | -1.60148     | 0.000932    | 0           |
| 7.626687    | 7.258725    | 1.290529     | 0.022983    | 0.031647    |
| 5.36867     | 5.799428    | -1.347942    | 0.018681    | 0.007191    |
| 7.375017    | 6.700524    | 1.596036     | 0.000073    | 0           |
| 5.757478    | 6.139004333 | -1.305035    | 0.013208667 | 0.006350333 |
| 8.938123    | 7.206152667 | 3.364419     | 3.96667E-05 | 0           |
| 7.971987    | 7.531048    | 1.357488     | 0.011245    | 0.007191    |
| 7.2087945   | 8.301326    | -2.135525    | 0.0026385   | 0.0002415   |
| 6.34729     | 6.981784    | -1.552393    | 0.001384    | 0           |
| 6.24583     | 5.318516    | 1.901732     | 0.000702    | 0           |
| 8.946562    | 9.39221     | -1.361925    | 0.016679    | 0.007191    |
| 7.80762225  | 6.44379375  | 2.614329     | 0.00016975  | 0           |
| 8.498378    | 7.726816    | 1.707117     | 0.001811    | 0.000232    |
| 8.738754    | 7.435453667 | 2.470325333  | 0.000325    | 0           |
| 6.141684    | 5.838103    | 1.234205     | 0.023787    | 0.031647    |
| 10.02655    | 3.920051    | 76.484339    | 0.0000595   | 0           |
| 12.16522    | 9.44734     | 6.579056     | 0.000052    | 0           |
| 8.864162    | 10.14516    | -2.430799    | 0.0027875   | 0.000232    |
| 6.955362667 | 7.592121    | -1.564297333 | 0.00793     | 0.002864333 |

|             |             |              |             |             |
|-------------|-------------|--------------|-------------|-------------|
| 6.374276    | 5.5350795   | 1.8337495    | 0.002341    | 0.000483    |
| 6.28278075  | 7.1002155   | -1.80106075  | 0.00610825  | 0.0038905   |
| 7.152372    | 7.812833    | -1.580587    | 0.036027    | 0.031647    |
| 5.33008225  | 6.02157225  | -1.6618155   | 0.009249    | 0.004642    |
| 9.091419286 | 7.970125143 | 2.225442     | 0.001981429 | 0.002223143 |
| 6.920511667 | 6.238269333 | 1.620605333  | 0.004142    | 0.002558    |
| 6.267534    | 6.794485    | -1.440881    | 0.000669    | 0           |
| 3.907462    | 4.271942    | -1.287418    | 0.005149    | 0.000483    |
| 5.769461667 | 6.583042    | -1.803087667 | 0.001372667 | 7.73333E-05 |
| 8.133170333 | 7.128889333 | 2.027593667  | 0.000274    | 0           |
| 6.9651855   | 5.914911    | 2.287238     | 0.001743    | 0.0002415   |
| 9.226886    | 8.514388    | 1.638639     | 0.000288    | 0           |
| 8.242353333 | 9.020037    | -1.72323     | 0.004870333 | 0.001079333 |
| 6.12619     | 6.856159    | -1.658603    | 0.001079    | 0           |
| 11.744491   | 11.444125   | 1.231457     | 0.021421    | 0.031647    |
| 12.0661075  | 11.3698295  | 1.621161     | 0.0003675   | 0           |
| 4.19847475  | 3.36208575  | 1.917318     | 0.005564    | 0.0047      |
| 6.12324025  | 6.5033045   | -1.303932    | 0.00635525  | 0.0038905   |
| 5.117605    | 5.463825667 | -1.271708667 | 0.014938    | 0.006266667 |
| 4.533944    | 5.571295    | -2.052456    | 0.001427    | 0           |
| 8.344123333 | 6.440571    | 4.221965667  | 0.000702333 | 7.73333E-05 |
| 7.946862    | 7.169926    | 1.713488     | 0.000038    | 0           |
| 8.232798    | 7.500703    | 1.661049     | 0.000547    | 0           |
| 9.308563    | 8.47137     | 1.786571     | 0.004122    | 0.001402    |
| 5.928239    | 6.784647    | -1.810524    | 0.003443    | 0.000232    |
| 7.971484    | 9.269547    | -2.458985    | 0.000024    | 0           |
| 7.138112    | 6.163114    | 1.965638     | 0.000995    | 0           |
| 6.095138    | 5.7218195   | 1.2954505    | 0.004184    | 0.001402    |
| 6.415586    | 7.4460496   | -2.0847898   | 0.0014316   | 0.0000966   |
| 5.9436665   | 6.758009    | -1.809367167 | 0.0009335   | 0           |
| 10.585663   | 9.747896    | 1.787282     | 0.000288    | 0           |
| 9.258016    | 8.430507    | 1.774619     | 0.007047    | 0.003006    |
| 11.391783   | 10.790105   | 1.517481     | 0.011039    | 0.007191    |
| 10.2294945  | 9.300265    | 1.9375685    | 0.0027065   | 0.000701    |
| 5.2284065   | 5.80703875  | -1.5006455   | 0.00305025  | 0.0004085   |

|             |             |              |             |             |
|-------------|-------------|--------------|-------------|-------------|
| 6.47514825  | 7.197621    | -1.660945    | 0.00466125  | 0.00087225  |
| 8.822343    | 6.304629    | 5.72674      | 0.000023    | 0           |
| 5.860919    | 7.202606333 | -2.577015667 | 0.000420333 | 0           |
| 6.629501    | 5.155065    | 2.77875      | 0.000101    | 0           |
| 7.79665     | 6.91518     | 1.842251     | 0.005863    | 0.003006    |
| 8.139006    | 8.936853667 | -1.744451333 | 0.008933333 | 0.003399    |
| 11.170168   | 10.488627   | 1.603852     | 0.00355     | 0.001402    |
| 4.4885225   | 5.7374555   | -2.813987    | 0.0006405   | 0           |
| 9.569261    | 8.482778    | 2.123558     | 0.01577     | 0.015562    |
| 4.8614635   | 3.550118    | 3.066383     | 0.0014105   | 0.0002415   |
| 5.677627    | 6.4026275   | -1.6532075   | 0.003111    | 0.000232    |
| 6.44114     | 7.052520333 | -1.529266667 | 0.002876667 | 0.000161    |
| 4.499911    | 5.578326    | -2.111714    | 0.004393    | 0.000483    |
| 6.166876    | 6.97536     | -1.75137     | 0.000169    | 0           |
| 7.49123     | 8.048843333 | -1.475835667 | 0.032286    | 0.023495    |
| 7.159143667 | 4.19892     | 9.52864      | 0.000202    | 0           |
| 6.532997    | 4.490481    | 4.119634     | 0.000031    | 0           |
| 7.242674333 | 5.627734    | 3.203406667  | 0.000551333 | 0           |
| 7.470938    | 8.04376     | -1.48743     | 0.008431    | 0.001402    |
| 8.151778    | 6.695051    | 2.74485      | 0.000252    | 0           |
| 7.987605    | 7.552226    | 1.352266     | 0.012601    | 0.015562    |
| 4.875860667 | 6.860937    | -4.053019667 | 6.63333E-05 | 0           |
| 9.372019667 | 8.109861333 | 2.418498     | 0.002648333 | 0.000628333 |
| 7.480377333 | 6.414877    | 2.108144667  | 0.002348333 | 0.000399333 |
| 5.695335    | 4.890296    | 1.747193     | 0.001715    | 0.000232    |
| 5.4709105   | 6.3908775   | -1.9040815   | 0.000107    | 0           |
| 6.659710333 | 7.666663667 | -2.069153    | 0.010949    | 0.010549    |
| 6.760461    | 7.391744    | -1.548942    | 0.01056     | 0.003006    |
| 9.226597    | 7.810178    | 2.672946     | 0.000310667 | 0           |
| 5.604392    | 2.931815    | 6.375669     | 0.000053    | 0           |
| 6.191605    | 7.3750935   | -2.332186    | 0.0000495   | 0           |
| 6.1278958   | 7.3367884   | -2.3356584   | 0.0018746   | 0.0000966   |
| 4.891322333 | 5.975049    | -2.164158667 | 0.004211    | 0.001002    |
| 4.74117225  | 4.03760175  | 1.64827925   | 0.0167555   | 0.0174905   |
| 5.602662    | 4.013451    | 3.769352     | 0.001312    | 0.000116    |

|             |             |              |             |             |
|-------------|-------------|--------------|-------------|-------------|
| 7.273052    | 6.6261      | 1.565856     | 0.001099    | 0           |
| 7.1023795   | 6.0962725   | 2.054062     | 0.0033705   | 0.001503    |
| 5.938865    | 5.275324    | 1.583966     | 0.011492    | 0.007191    |
| 5.69760475  | 3.9141505   | 4.99816025   | 0.00088975  | 0.00012075  |
| 10.352447   | 7.253953    | 8.565243     | 0.000018    | 0           |
| 5.8845315   | 6.4407035   | -1.4753855   | 0.0012575   | 0           |
| 10.790746   | 9.193118    | 3.026453     | 0.000269    | 0           |
| 9.4389378   | 8.5533434   | 1.8581046    | 0.007343    | 0.0066098   |
| 9.969886    | 7.948434    | 4.05992      | 0.000134    | 0           |
| 7.973925    | 7.530947    | 1.359408     | 0.013988    | 0.015562    |
| 10.212683   | 8.33271     | 3.680683     | 0.000046    | 0           |
| 6.6921158   | 5.8478226   | 1.809317     | 0.0084518   | 0.0086492   |
| 6.728782    | 7.188314    | -1.375096    | 0.001158    | 0           |
| 7.5945615   | 8.2840265   | -1.6359625   | 0.002135    | 0.0002415   |
| 6.546019333 | 7.178955333 | -1.551034667 | 0.001655    | 7.73333E-05 |
| 7.784499    | 7.143633    | 1.559935     | 0.010246    | 0.008586333 |
| 6.197263    | 5.753458667 | 1.361690333  | 0.004979333 | 0.002558    |
| 5.823673333 | 4.667536333 | 2.250799     | 0.000403333 | 0           |
| 6.7252955   | 7.73513     | -2.016898    | 0.0008145   | 0           |
| 5.221346    | 5.715143    | -1.408146    | 0.018451    | 0.007191    |
| 7.680195    | 6.6188955   | 2.1323495    | 0.0010825   | 0.000116    |
| 6.979507    | 7.663578    | -1.606667    | 0.003004    | 0.000232    |
| 9.265466    | 8.745883    | 1.433541     | 0.009592    | 0.007191    |
| 8.606572    | 8.980831    | -1.296173    | 0.002361    | 0           |
| 4.627459    | 3.975129    | 1.571704     | 0.001462    | 0           |
| 10.084316   | 9.319131    | 1.699588     | 0.001669    | 0.000232    |
| 5.655745    | 4.083297    | 2.974089     | 0.000066    | 0           |
| 5.5256325   | 5.0637205   | 1.380052     | 0.0051655   | 0.003837    |
| 9.05173     | 8.299739    | 1.684115     | 0.003182    | 0.000483    |
| 7.474361    | 7.0348      | 1.356192     | 0.01549     | 0.015562    |
| 8.018569    | 7.401344    | 1.533922     | 0.003621    | 0.001402    |
| 11.404418   | 10.510036   | 1.858813     | 0.01464     | 0.015562    |
| 7.991431    | 8.432738    | -1.358348    | 0.020031    | 0.0159395   |
| 8.816505    | 8.329669    | 1.401368     | 0.013665    | 0.015562    |
| 4.131011    | 4.444313    | -1.242548    | 0.006411    | 0.001402    |

|             |             |              |             |             |
|-------------|-------------|--------------|-------------|-------------|
| 5.036239    | 5.574816333 | -1.455184    | 0.006695333 | 0.001546667 |
| 7.842143    | 6.766837    | 2.10717      | 0.000376    | 0           |
| 6.065615    | 6.7433745   | -1.660715    | 0.021197    | 0.0158235   |
| 6.6536125   | 7.246221    | -1.514401    | 0.0213025   | 0.0158235   |
| 6.934869    | 7.756695    | -1.791008    | 0.014161    | 0.007781    |
| 8.3505915   | 7.1606375   | 2.305314     | 0.000647    | 0           |
| 4.945205    | 5.906542    | -1.947114    | 0.000032    | 0           |
| 7.436379    | 7.900394    | -1.379375    | 0.014134    | 0.007191    |
| 7.801104333 | 8.398951333 | -1.525741667 | 0.012185333 | 0.010626333 |
| 5.191421    | 5.71464     | -1.437159    | 0.003003    | 0.000232    |
| 8.5785655   | 9.354142    | -1.713249    | 0.0120825   | 0.007781    |
| 8.628209    | 8.011464    | 1.533412     | 0.005913    | 0.003006    |
| 7.215303    | 8.295645    | -2.114537    | 0.007148    | 0.001402    |
| 9.786971    | 9.121156    | 1.586464     | 0.001444    | 0           |
| 7.667267    | 9.4709425   | -3.6065515   | 0.0007885   | 0           |
| 6.199053    | 5.339840333 | 1.824687     | 0.005914333 | 0.003476333 |
| 7.176382    | 8.461218    | -2.4365495   | 0.001014    | 0           |
| 5.89237     | 6.277487    | -1.305966    | 0.019488    | 0.007191    |
| 7.645679    | 8.6112515   | -1.9532685   | 0.0004105   | 0           |
| 5.5634855   | 6.712643    | -2.223473    | 0.0005775   | 0           |
| 6.59111     | 7.110783    | -1.433629    | 0.008503    | 0.001402    |
| 5.4986885   | 6.6213735   | -2.209731    | 0.0011835   | 0           |
| 7.087007    | 7.624721667 | -1.454649333 | 0.024334    | 0.016203667 |
| 5.61328     | 6.622928    | -2.0136045   | 0.007606    | 0.001402    |
| 5.382265    | 3.890905    | 2.8616495    | 0.005084    | 0.0035955   |
| 4.924367    | 5.5700445   | -1.5672385   | 0.003074    | 0.0002415   |
| 5.961206    | 6.847254    | -1.848107    | 0.003024    | 0.000232    |
| 3.899038    | 3.415605    | 1.401535667  | 0.003257667 | 0.002397    |
| 8.321399    | 8.026909    | 1.226451     | 0.014338    | 0.015562    |
| 9.573176    | 10.511384   | -1.917239    | 0.0001985   | 0           |
| 10.42917    | 10.056543   | 1.294708     | 0.009592    | 0.007191    |
| 4.900918    | 3.359235    | 2.91134      | 0.001426    | 0           |
| 8.936704    | 9.332043    | -1.315251    | 0.015085    | 0.007191    |
| 7.580147    | 6.52853     | 2.082404     | 0.001706    | 0.000238333 |
| 10.529571   | 9.059244    | 2.770847     | 0.000045    | 0           |

|             |             |              |             |             |
|-------------|-------------|--------------|-------------|-------------|
| 8.062593    | 7.065606    | 1.995827     | 0.000091    | 0           |
| 8.94256     | 7.562795    | 2.60226      | 0.000213    | 0           |
| 6.623388    | 7.128777    | -1.419507    | 0.009152    | 0.001402    |
| 9.8320966   | 8.4652516   | 2.6118846    | 0.0013066   | 0.0003268   |
| 11.35639467 | 10.04541633 | 2.488439     | 0.000362    | 0           |
| 7.3975865   | 6.3171355   | 2.1405925    | 0.000107    | 0           |
| 9.6144025   | 9.0766905   | 1.451996     | 0.0129105   | 0.0113765   |
| 6.5570595   | 7.7249785   | -2.256053    | 0.0004435   | 0           |
| 9.000428    | 7.533174    | 2.76495      | 0.000308    | 0           |
| 8.839813    | 7.934911    | 1.872416     | 0.003796    | 0.001402    |
| 8.108274333 | 7.179359    | 1.904587667  | 0.001840333 | 0.000154667 |
| 7.3052025   | 6.5816725   | 1.680589     | 0.0169185   | 0.0173265   |
| 7.667934    | 9.29582     | -3.090598    | 0.000499    | 0           |
| 5.993599    | 5.436773    | 1.474171     | 0.015052    | 0.0158235   |
| 7.857423    | 8.7643045   | -1.8824075   | 0.0138835   | 0.007781    |
| 7.1141755   | 7.7393265   | -1.558989    | 0.01834     | 0.0158235   |
| 6.89262     | 7.364383    | -1.386803    | 0.023621    | 0.015562    |
| 6.667754    | 6.95088     | -1.216828    | 0.026487    | 0.015562    |
| 6.967542333 | 7.598091333 | -1.557797667 | 0.006992333 | 0.002397    |
| 5.105588    | 5.447144    | -1.267123    | 0.008573    | 0.001402    |
| 7.538182    | 7.918178    | -1.301338    | 0.000736    | 0           |
| 6.105857    | 6.937509    | -1.785968    | 0.0003255   | 0           |
| 5.70118     | 6.520814    | -1.764957    | 0.000113    | 0           |
| 6.891962    | 7.5807575   | -1.611942    | 0.0020125   | 0.000116    |
| 9.874878    | 8.977683    | 1.884180667  | 0.001407833 | 0.000233667 |
| 3.448463    | 4.174937    | -1.65459     | 0.025485    | 0.015562    |
| 6.771722    | 7.738612    | -1.954622    | 0.000019    | 0           |
| 10.582946   | 5.736772    | 28.763622    | 0.000018    | 0           |
| 5.989242    | 5.489624    | 1.413839     | 0.001958    | 0.000232    |
| 9.538822    | 6.961062    | 5.970121     | 0.000026    | 0           |
| 5.8620025   | 6.549773    | -1.6179005   | 0.0190815   | 0.0165245   |
| 4.270997    | 4.7498785   | -1.393983    | 0.0223705   | 0.015562    |
| 6.228558    | 5.1846875   | 2.3694885    | 0.0083545   | 0.007781    |
| 9.240799    | 9.970006    | -1.657728    | 0.004386    | 0.000483    |
| 4.959536    | 4.535967    | 1.341242     | 0.022478    | 0.031647    |

|             |             |              |             |             |
|-------------|-------------|--------------|-------------|-------------|
| 9.249030667 | 7.798604333 | 2.744762667  | 0.001767667 | 0.000544667 |
| 5.385301333 | 5.899369    | -1.472698    | 0.019174667 | 0.012946    |
| 5.285614333 | 6.075029333 | -1.735310333 | 0.000542333 | 0           |
| 9.9503055   | 8.9760285   | 1.967025     | 0.0007035   | 0           |
| 8.45376     | 9.235702    | -1.719443    | 0.000537    | 0           |
| 8.114002    | 7.257683    | 1.810413     | 0.000337    | 0           |
| 7.328844    | 6.368043    | 1.968414     | 0.0017155   | 0.0002415   |
| 6.7583085   | 7.948245    | -2.282972    | 0.0007835   | 0           |
| 4.529574    | 4.956391    | -1.344264    | 0.00737     | 0.001402    |
| 8.965159    | 9.5280835   | -1.479418    | 0.005445    | 0.001503    |
| 6.445376    | 8.270027    | -3.637712    | 0.0000505   | 0           |
| 7.7256375   | 6.7918225   | 1.938981     | 0.005173    | 0.0035955   |
| 9.0729775   | 8.38699975  | 1.615719     | 0.00677375  | 0.005343    |
| 11.15023467 | 10.34988267 | 1.755415333  | 0.002665667 | 0.000399333 |
| 6.942631    | 8.394195    | -2.735045    | 0.001093    | 0           |
| 14.067989   | 10.691953   | 10.382175    | 0.000018    | 0           |
| 8.9478415   | 8.2777145   | 1.600557     | 0.0002615   | 0           |
| 14.762329   | 13.399404   | 2.572062     | 0.000018    | 0           |
| 8.525182667 | 5.639989667 | 7.421221667  | 0.000095    | 0           |
| 5.91718     | 5.14152     | 1.854518     | 0.003189333 | 0.001079333 |
| 5.259494    | 4.719515    | 1.472279     | 0.004365    | 0.0017445   |
| 10.504562   | 11.213897   | -1.635051    | 0.008086    | 0.001402    |
| 6.201806333 | 6.988279    | -1.725766333 | 0.001471    | 0           |
| 8.8114005   | 9.2169605   | -1.324613    | 0.0315515   | 0.0236045   |
| 7.018435    | 6.0522315   | 2.03252      | 0.0014605   | 0.0002415   |
| 6.7841685   | 6.16655875  | 1.53742675   | 0.0077415   | 0.00603875  |
| 4.327647    | 4.840043    | -1.426417    | 0.036923    | 0.031647    |
| 6.6604385   | 7.8506295   | -2.29832125  | 0.0000875   | 0           |
| 5.137316    | 5.664742    | -1.441355    | 0.004063    | 0.000232    |
| 10.389216   | 8.4703395   | 3.94510325   | 0.00005525  | 0           |
| 4.306401    | 3.705377    | 1.516793     | 0.001779    | 0.000232    |
| 6.819717    | 5.803474    | 2.022645     | 0.000025    | 0           |
| 7.218373    | 6.64303     | 1.491388     | 0.0237155   | 0.0236045   |
| 8.185122667 | 9.070208833 | -1.855103667 | 0.0045965   | 0.002632333 |
| 4.7872255   | 5.66189     | -1.8806365   | 0.0001575   | 0           |

|             |             |             |             |             |
|-------------|-------------|-------------|-------------|-------------|
| 5.607991667 | 6.158755    | -1.506388   | 0.016912    | 0.012946    |
| 7.347987    | 9.11446     | -3.402212   | 0.000318    | 0           |
| 5.798242333 | 4.383287333 | 3.254344333 | 0.001173    | 0.000161    |
| 6.667227    | 5.5179515   | 2.2756565   | 0.000791    | 0           |
| 9.774985667 | 8.620443    | 2.265039333 | 0.001006333 | 7.73333E-05 |
| 9.60477     | 8.579016    | 2.036023    | 0.001542    | 0.000232    |
| 7.760637    | 6.676735    | 2.119761    | 0.000093    | 0           |
| 6.676540667 | 5.405907    | 2.622182    | 0.002064667 | 0.001002    |
| 6.165255    | 6.779632    | -1.530896   | 0.016522    | 0.007191    |
| 7.26786     | 6.5307568   | 1.7101706   | 0.010093    | 0.0094418   |
| 8.725243    | 8.0816195   | 1.579794    | 0.006372    | 0.0042965   |
| 7.2995375   | 6.3981985   | 1.8904445   | 0.005052    | 0.0037115   |
| 6.390081    | 5.5363      | 1.807231    | 0.00216     | 0.000232    |
| 9.17043     | 7.699092    | 2.772791    | 0.00011     | 0           |
| 5.628582    | 6.143325    | -1.42874    | 0.009557    | 0.003006    |
| 6.987057    | 7.4930635   | -1.426351   | 0.014117    | 0.0080225   |
| 7.0490575   | 5.625793    | 2.8803625   | 0.000374    | 0           |
| 6.854501    | 4.969829    | 3.692689    | 0.000021    | 0           |
| 10.26691067 | 8.382983    | 3.69776     | 0.000431    | 0           |
| 5.369448333 | 6.083207    | -1.7448     | 0.009297    | 0.005264667 |
| 6.858323    | 6.1521175   | 1.650591    | 0.012596    | 0.009284    |
| 8.279022    | 7.19207     | 2.124248    | 0.000253    | 0           |
| 8.327615    | 6.714262    | 3.059622    | 0.000038    | 0           |
| 5.625964667 | 4.448729333 | 2.434466    | 0.002313667 | 0.001002    |
| 6.374134    | 5.44835125  | 1.966923    | 0.0030265   | 0.001102    |
| 7.643938    | 8.803275    | -2.233547   | 0.003218    | 0.000232    |
| 5.5817925   | 6.6296455   | -2.115336   | 0.003333    | 0.000701    |
| 4.309202    | 5.258762    | -1.931284   | 0.00205     | 0           |
| 8.397719    | 7.989923    | 1.326657    | 0.023412    | 0.031647    |
| 3.705858    | 3.205721    | 1.414348    | 0.029434    | 0.031647    |
| 5.287453    | 6.112888    | -1.772069   | 0.000296    | 0           |
| 5.74682825  | 6.34088025  | -1.51869225 | 0.00848175  | 0.00267     |
| 8.111836    | 7.260187    | 1.804562    | 0.000793    | 0           |
| 8.848549    | 5.416868    | 10.790432   | 0.000033    | 0           |
| 5.679967    | 6.366631    | -1.609557   | 0.005941    | 0.000483    |



|             |             |              |             |           |
|-------------|-------------|--------------|-------------|-----------|
| 3.647442    | 4.321721    | -1.595798    | 0.003774    | 0.000232  |
| 6.980241    | 7.535859    | -1.469798    | 0.00488     | 0.000483  |
| 7.1354505   | 7.893199    | -1.691134    | 0.000348    | 0         |
| 6.435829    | 5.699891    | 1.6655925    | 0.0087805   | 0.008482  |
| 11.5261455  | 9.8171825   | 3.29069475   | 0.00002875  | 0         |
| 7.3008345   | 5.6441      | 3.3864855    | 0.000222    | 0         |
| 7.0899815   | 7.532879    | -1.362778    | 0.0159805   | 0.008482  |
| 5.68324     | 6.834314    | -2.220792    | 0.000754    | 0         |
| 6.467712    | 7.471652    | -2.005469    | 0.000159    | 0         |
| 8.315677    | 8.774543    | -1.374461    | 0.020802    | 0.007191  |
| 6.9463068   | 5.96458     | 2.022901     | 0.0075916   | 0.0077676 |
| 10.469343   | 9.477818    | 1.988285     | 0.000355    | 0         |
| 8.6340915   | 7.46319     | 2.3323955    | 0.0000295   | 0         |
| 7.210575    | 7.9406875   | -1.6591805   | 0.001727    | 0         |
| 7.824313    | 8.6781415   | -1.8073525   | 0.0002205   | 0         |
| 6.619403    | 7.163009    | -1.457611    | 0.015186    | 0.007191  |
| 8.4325605   | 9.2902595   | -1.81229     | 0.0014515   | 0         |
| 4.0265912   | 4.649008    | -1.5873524   | 0.0078746   | 0.0026406 |
| 5.911616667 | 6.697025333 | -1.761130333 | 0.017190333 | 0.011551  |
| 6.417816    | 5.85498     | 1.484703333  | 0.007318333 | 0.004401  |
| 4.402564    | 4.754108    | -1.275925    | 0.007893    | 0.001402  |
| 6.3630755   | 6.9679995   | -1.5281785   | 0.0068885   | 0.001619  |
| 6.523118    | 6.029325    | 1.408142     | 0.003172    | 0.000483  |
| 7.57443     | 8.896285    | -2.499872    | 0.00003     | 0         |
| 6.269081    | 4.07259     | 4.583631     | 0.000108    | 0         |
| 8.281496333 | 6.324298667 | 4.780506     | 3.53333E-05 | 0         |
| 5.592129    | 6.207924    | -1.532403    | 0.002011    | 0         |
| 4.178179    | 3.60689     | 1.485851     | 0.028319    | 0.031647  |
| 7.820207    | 5.648242    | 4.506367     | 0.000021    | 0         |
| 7.242796    | 7.832808    | -1.505259    | 0.000563    | 0         |
| 5.2094205   | 4.4455505   | 1.7783315    | 0.005373    | 0.0035955 |
| 5.011878    | 4.0658535   | 2.06978525   | 0.00075025  | 0.000058  |
| 5.389741    | 6.3767805   | -2.189058    | 0.002484    | 0.0002415 |
| 6.282704    | 6.8575324   | -1.4961178   | 0.0055654   | 0.0010246 |
| 6.794892    | 7.402083    | -1.52329     | 0.00303     | 0.000232  |

|             |             |             |             |             |
|-------------|-------------|-------------|-------------|-------------|
| 4.6661695   | 5.14752     | -1.404263   | 0.0085355   | 0.0017445   |
| 6.100361    | 6.692842    | -1.507838   | 0.031673    | 0.031647    |
| 7.41723     | 8.721568    | -2.47143725 | 0.000769    | 0           |
| 7.384629    | 8.010583    | -1.543232   | 0.006203    | 0.001402    |
| 8.221959    | 6.026311    | 4.580952    | 0.000032    | 0           |
| 5.717237    | 5.131994    | 1.500324    | 0.0051705   | 0.0035955   |
| 6.939961    | 7.577065    | -1.555205   | 0.000111    | 0           |
| 9.540422    | 6.340645    | 9.188168    | 0.00032     | 0           |
| 6.168947    | 5.809208    | 1.283194    | 0.020913    | 0.031647    |
| 6.198537    | 6.575161    | -1.2983     | 0.001284    | 0           |
| 8.650386    | 4.522221    | 17.486447   | 0.000019    | 0           |
| 7.390218    | 7.769219    | -1.300441   | 0.012114    | 0.003006    |
| 5.752109    | 6.493783    | -1.672115   | 0.00861     | 0.001402    |
| 6.976596333 | 6.142998333 | 1.827975    | 0.005408667 | 0.005187333 |
| 5.6769195   | 7.379241    | -3.3639005  | 0.001195    | 0           |
| 5.311535    | 6.2520995   | -1.9378065  | 0.0000205   | 0           |
| 5.6254015   | 6.1736405   | -1.468184   | 0.005731    | 0.001503    |
| 5.719953    | 6.54171     | -1.767775   | 0.0004615   | 0           |
| 6.070542    | 7.332814    | -2.398731   | 0.000025    | 0           |
| 9.5039255   | 8.8863575   | 1.5344575   | 0.017453    | 0.019419    |
| 6.4981975   | 6.0277385   | 1.385961    | 0.0090975   | 0.009284    |
| 10.93691    | 10.344804   | 1.507446    | 0.021502    | 0.031647    |
| 9.613571    | 7.206123    | 5.30535     | 0.000018    | 0           |
| 3.530479    | 3.924308    | -1.313876   | 0.008705    | 0.001402    |
| 5.989536667 | 4.922848667 | 2.164287    | 0.004532    | 0.002004    |
| 9.031189    | 7.807075    | 2.364822    | 0.0013305   | 0.0002415   |
| 7.955348    | 7.544878    | 1.329119    | 0.001601    | 0.000232    |
| 6.525973    | 6.003636    | 1.436279    | 0.001756    | 0.000232    |
| 5.195269    | 4.259309    | 1.913164    | 0.000589    | 0           |
| 5.9833465   | 5.3631075   | 1.545751    | 0.0038895   | 0.001503    |
| 7.7401905   | 6.5610055   | 2.2804235   | 0.001063    | 0           |
| 7.9248952   | 6.861812    | 2.1176698   | 0.002909    | 0.0012488   |
| 6.7783415   | 6.089696    | 1.645182    | 0.0018385   | 0.000232    |
| 5.614160667 | 4.989550667 | 1.548464333 | 0.003549    | 0.001079333 |
| 5.701072    | 6.307996    | -1.523009   | 0.002899    | 0.000232    |

|             |             |              |             |             |
|-------------|-------------|--------------|-------------|-------------|
| 6.944061    | 6.370928    | 1.48775      | 0.003269    | 0.000483    |
| 6.60614     | 6.133355    | 1.387787     | 0.003758    | 0.001402    |
| 7.719385    | 8.572687    | -1.807919    | 0.0017135   | 0           |
| 8.017406    | 8.583659    | -1.480673    | 0.006582    | 0.001402    |
| 7.3489345   | 6.5583375   | 1.7308765    | 0.000471    | 0           |
| 4.851215    | 5.7727915   | -1.978266    | 0.005658    | 0.001503    |
| 4.710177    | 5.129701    | -1.337486    | 0.001129    | 0           |
| 6.469299    | 5.838302    | 1.5502015    | 0.002621    | 0.000483    |
| 7.866496    | 6.091327    | 3.422782     | 0.000035    | 0           |
| 7.184475    | 6.3086115   | 1.837607     | 0.0012745   | 0.000116    |
| 6.668205667 | 7.160364    | -1.406563667 | 0.018309667 | 0.008586333 |
| 6.353114    | 5.290362    | 2.088913     | 0.003242    | 0.000483    |
| 8.032245333 | 7.194474667 | 1.810218667  | 0.002932667 | 0.001002    |
| 8.780431333 | 9.304208333 | -1.439569    | 0.019667    | 0.011712    |
| 7.260514    | 6.817163    | 1.359758     | 0.002046    | 0.000232    |
| 6.070336    | 6.794145    | -1.651537    | 0.000108    | 0           |
| 5.676091    | 6.212766    | -1.451631    | 0.019824    | 0.016065    |
| 6.887312333 | 5.407119333 | 2.916080333  | 0.000226    | 0           |
| 6.797445    | 6.273466    | 1.437916     | 0.001979    | 0.000232    |
| 6.6284945   | 5.57519625  | 2.08706225   | 0.00052     | 0           |
| 5.759171    | 6.424032    | -1.585416    | 0.022083    | 0.015562    |
| 9.555717    | 9.14304     | 1.331153     | 0.01388     | 0.015562    |
| 12.179974   | 10.494059   | 3.217445     | 0.000018    | 0           |
| 8.114509    | 8.784241    | -1.590777    | 0.005418    | 0.000483    |
| 6.143495    | 6.490869    | -1.2740345   | 0.040845    | 0.031647    |
| 4.945647    | 6.358985    | -2.663527    | 0.000084    | 0           |
| 8.653068    | 9.297718333 | -1.564512333 | 0.004165667 | 0.000628333 |
| 5.51755575  | 4.582883    | 1.96656625   | 0.00465475  | 0.002728    |
| 8.036429    | 6.3845425   | 3.165063     | 0.0001945   | 0           |
| 3.947617    | 4.442551    | -1.409257    | 0.027997    | 0.015562    |
| 6.05903     | 6.468647    | -1.328333    | 0.013463    | 0.003006    |
| 8.3069255   | 7.737944    | 1.487541     | 0.0022615   | 0.0002415   |
| 8.397749    | 7.0934645   | 2.50993      | 0.00009325  | 0           |
| 7.107160167 | 6.210872167 | 1.9191235    | 0.0074165   | 0.007900167 |
| 8.5722714   | 7.2498848   | 2.5061648    | 0.000537    | 0.0000464   |

|             |             |              |             |             |
|-------------|-------------|--------------|-------------|-------------|
| 10.08008033 | 7.519249333 | 5.967252333  | 0.000057    | 0           |
| 7.069607    | 7.905177    | -1.784562    | 0.000206    | 0           |
| 9.75153     | 7.682435    | 4.196232     | 0.000018    | 0           |
| 8.564337    | 7.582305    | 1.9806255    | 0.0000205   | 0           |
| 5.456701    | 6.148249    | -1.615016    | 0.003784    | 0.000232    |
| 7.022942    | 7.367628    | -1.269875    | 0.003777    | 0.000232    |
| 7.138242    | 7.751262    | -1.529458    | 0.003581    | 0.000232    |
| 6.920134333 | 7.633669    | -1.640846    | 0.005936333 | 0.001469333 |
| 11.22192    | 10.461944   | 1.693462     | 0.000456    | 0           |
| 7.635528    | 7.095402    | 1.454099     | 0.000653    | 0           |
| 6.109536    | 4.465097    | 3.126263     | 0.000524    | 0           |
| 9.2376175   | 5.47972     | 14.220039    | 0.000039    | 0           |
| 6.921435    | 6.310538    | 1.527208     | 0.024371    | 0.031647    |
| 7.38848     | 5.638234    | 3.36416      | 0.000595    | 0           |
| 6.536341    | 5.552502    | 1.997579     | 0.002572    | 0.000701    |
| 5.446810333 | 6.34073     | -1.909279333 | 0.004327667 | 0.001002    |
| 4.355828    | 4.880811    | -1.438916    | 0.002179    | 0           |
| 5.3389895   | 5.868959    | -1.4462165   | 0.0024135   | 0.0002415   |
| 8.839852    | 9.665349    | -1.772146    | 0.000276    | 0           |
| 8.240108    | 8.7412895   | -1.4211685   | 0.0065825   | 0.001503    |
| 6.013667    | 6.456854    | -1.359605    | 0.012079    | 0.003006    |
| 7.907144    | 6.3461225   | 2.9655815    | 0.0002075   | 0           |
| 8.5154902   | 6.966925    | 2.954436     | 0.0003122   | 0           |
| 5.115538    | 5.403123    | -1.220595    | 0.04328     | 0.031647    |
| 7.520917    | 6.996923    | 1.43793      | 0.003211    | 0.000483    |
| 7.309836    | 4.8686815   | 6.14592      | 0.000035    | 0           |
| 4.7584735   | 5.824355    | -2.145314    | 0.000636    | 0           |
| 8.791002    | 9.355532    | -1.478907    | 0.011719    | 0.003006    |
| 5.647331    | 5.200559    | 1.362987     | 0.017431    | 0.015562    |
| 8.510291333 | 9.236143667 | -1.661502333 | 0.000255667 | 0           |
| 6.309606286 | 5.196520571 | 2.241599     | 0.001039429 | 0.000233429 |
| 6.315383    | 6.722308    | -1.325856    | 0.012313    | 0.003006    |
| 7.009591    | 8.126361    | -2.2495585   | 0.000084    | 0           |
| 8.50007     | 8.040714    | 1.374928     | 0.004644    | 0.001402    |
| 4.9492435   | 5.4055405   | -1.381241    | 0.025189    | 0.019419    |

|             |             |              |             |            |
|-------------|-------------|--------------|-------------|------------|
| 7.7485315   | 5.251162    | 6.3758415    | 0.0001505   | 0          |
| 6.542672    | 5.810486    | 1.7060265    | 0.00279625  | 0.00179775 |
| 6.57291     | 7.114942    | -1.456022    | 0.015469    | 0.007191   |
| 7.488878    | 6.40308075  | 2.17531075   | 0.0030955   | 0.00179775 |
| 9.193845    | 8.645712    | 1.462193     | 0.010426    | 0.007191   |
| 7.474428333 | 9.047322667 | -2.988285667 | 0.001802    | 0.000161   |
| 5.409649    | 5.7873285   | -1.30111     | 0.006413    | 0.001619   |
| 5.414178    | 6.197129    | -1.720647    | 0.001854    | 0          |
| 5.824066    | 6.574653    | -1.682476    | 0.000053    | 0          |
| 5.192071    | 5.748234    | -1.470354    | 0.004474    | 0.000483   |
| 4.540614    | 4.825442    | -1.218265    | 0.019176    | 0.007191   |
| 5.256755    | 5.7729      | -1.430128    | 0.014881    | 0.007191   |
| 4.2390605   | 4.90946     | -1.605063    | 0.008655    | 0.0037115  |
| 6.551361    | 7.166584    | -1.531794    | 0.000169    | 0          |
| 5.585813    | 6.109558    | -1.437683    | 0.009371    | 0.003006   |
| 6.432476    | 7.221083    | -1.746598    | 0.0005735   | 0          |
| 5.740981    | 6.539885    | -1.739779    | 0.000494    | 0          |
| 7.000488    | 6.625562    | 1.296773     | 0.025078    | 0.031647   |
| 4.002098    | 5.191309    | -2.280279    | 0.000106    | 0          |
| 5.589059    | 6.001961    | -1.331361    | 0.027433    | 0.015562   |
| 5.639393    | 4.301047    | 2.528614     | 0.001157    | 0          |
| 3.33445     | 3.777337    | -1.359322    | 0.020975    | 0.015562   |
| 5.8437535   | 6.392535    | -1.4748165   | 0.0012555   | 0          |
| 6.758118    | 5.660593    | 2.1745475    | 0.001286    | 0.0002415  |
| 5.722616    | 6.360932    | -1.556511    | 0.000257    | 0          |
| 5.298758    | 6.437042    | -2.201191    | 0.000618    | 0          |
| 6.097574    | 6.569326    | -1.386792    | 0.009266    | 0.003006   |
| 5.710759    | 6.101111    | -1.310714    | 0.014558    | 0.007191   |
| 5.406577    | 5.836684    | -1.347333    | 0.001477    | 0          |
| 4.609331    | 5.42101     | -1.755254    | 0.00594     | 0.000483   |
| 5.0552055   | 5.4752355   | -1.342313    | 0.0059455   | 0.001503   |
| 6.241127    | 7.080202    | -1.788903    | 0.000032    | 0          |
| 7.054065    | 6.686818    | 1.289889     | 0.01376     | 0.015562   |
| 7.823969667 | 8.300782    | -1.392268    | 0.007787667 | 0.001402   |
| 4.980037    | 5.476684    | -1.4111295   | 0.008911    | 0.002204   |

|          |          |           |           |          |
|----------|----------|-----------|-----------|----------|
| 6.639269 | 7.01385  | -1.296463 | 0.028864  | 0.015562 |
| 5.179021 | 5.465501 | -1.219661 | 0.03835   | 0.031647 |
| 6.403466 | 7.924791 | -2.870546 | 0.000263  | 0        |
| 5.772187 | 7.045082 | -2.466404 | 0.0000195 | 0        |
| 4.62935  | 4.992393 | -1.286135 | 0.004844  | 0.000483 |

| Mean Signal of Group Sepsis(GSE64457) | Mean Signal of Group Control(GSE64457) | Fold Change(GSE64457) | p-value(GSE64457) | FDR(GSE64457) |
|---------------------------------------|----------------------------------------|-----------------------|-------------------|---------------|
| 5.797497                              | 6.52609                                | -1.657022             | 0.005354          | 0.015015      |
| 4.586383                              | 4.229916                               | 1.280287              | 0.012568          | 0.048139      |
| 8.0891735                             | 7.206919                               | 1.8434745             | 0.000025          | 0             |
| 4.549935                              | 2.9547645                              | 3.337991833           | 0.005253667       | 0.019876      |
| 5.51349825                            | 4.2860795                              | 2.430142              | 0.0044205         | 0.0128895     |
| 3.374834                              | 4.543468                               | -2.247988             | 0.000464          | 0.002333      |
| 7.084918                              | 6.413052667                            | 1.593349333           | 0.006654333       | 0.024091667   |
| 3.069875                              | 2.747228                               | 1.250623              | 0.019591          | 0.048139      |
| 2.745936                              | 5.508647                               | -6.786705             | 0.000024          | 0             |
| 5.723908667                           | 4.658711333                            | 2.100518333           | 0.000731667       | 0.004691      |
| 8.501079                              | 7.806636                               | 1.618328              | 0.004665          | 0.0174755     |
| 8.910644                              | 8.318569                               | 1.5134015             | 0.0075725         | 0.025236      |
| 4.633812                              | 5.74074                                | -2.153866             | 0.011174          | 0.033306      |
| 11.289345                             | 10.914374                              | 1.296813              | 0.000645          | 0.003863      |
| 5.078247                              | 2.571253                               | 5.684347              | 0.002993          | 0.015015      |
| 4.570813                              | 6.55274                                | -3.950202             | 0.000042          | 0             |
| 8.08473075                            | 6.4189775                              | 3.19433525            | 0.00003825        | 0             |
| 5.195899                              | 4.895305                               | 1.231651              | 0.005466          | 0.022439      |
| 5.709956333                           | 4.878950333                            | 1.782326333           | 0.003139667       | 0.012476667   |
| 9.346898                              | 7.916306                               | 2.695573              | 0.000433          | 0.002333      |
| 10.552119                             | 9.935318                               | 1.53347               | 0.000124          | 0.001086      |
| 5.983989                              | 5.4821465                              | 1.4271935             | 0.002742          | 0.013151      |
| 10.510893                             | 10.1629795                             | 1.2727185             | 0.015023          | 0.048139      |
| 2.311218                              | 2.79505                                | -1.398453             | 0.002392          | 0.009121      |
| 7.474784                              | 6.4793305                              | 2.0104965             | 0.001185          | 0.00587       |
| 9.4344405                             | 10.249438                              | -1.759509             | 0.0002135         | 0.001645      |
| 6.52195                               | 7.823633                               | -2.465163             | 0.00014           | 0.001086      |
| 3.331438                              | 2.005699                               | 2.506612              | 0.014228          | 0.048139      |
| 6.185421                              | 7.182204                               | -1.995544             | 0.000182          | 0.001645      |
| 7.799065                              | 8.50893                                | -1.635651             | 0.010319          | 0.033306      |
| 7.911923                              | 6.797657                               | 2.164848              | 0.001173          | 0.00587       |
| 6.59506                               | 7.157059                               | -1.476314             | 0.002433          | 0.009121      |
| 7.277059                              | 8.034608                               | -1.69542175           | 0.00277475        | 0.01011475    |

|             |             |              |             |             |
|-------------|-------------|--------------|-------------|-------------|
| 6.440276    | 6.0205      | 1.33772      | 0.012359    | 0.033306    |
| 10.808107   | 8.704899    | 4.296639     | 0.000322    | 0.002333    |
| 10.373929   | 9.048798    | 2.505557     | 0.000081    | 0           |
| 5.747893    | 6.678019    | -1.905442    | 0.000068    | 0           |
| 6.927921    | 6.28812     | 1.558114     | 0.014452    | 0.048139    |
| 8.508608    | 8.1058145   | 1.3222575    | 0.017962    | 0.048139    |
| 3.347524    | 5.380797    | -4.093325    | 0.00525     | 0.015015    |
| 7.2007965   | 5.0827035   | 4.51627925   | 0.00223575  | 0.00956025  |
| 5.24862825  | 4.0021985   | 2.40919525   | 0.00137725  | 0.00638775  |
| 5.314249    | 5.867871    | -1.467766    | 0.016402    | 0.048139    |
| 5.57766     | 6.085508    | -1.421927    | 0.008001    | 0.022439    |
| 6.050821    | 5.113194    | 1.915374     | 0.004066    | 0.015015    |
| 8.6912635   | 8.1083      | 1.5019865    | 0.001215    | 0.00587     |
| 10.163902   | 9.790412    | 1.295483     | 0.002867    | 0.015015    |
| 6.442562    | 5.58831     | 1.81642175   | 0.009665    | 0.0324415   |
| 8.872115    | 8.247157    | 1.542166     | 0.012835    | 0.048139    |
| 5.894065375 | 4.496122125 | 2.694163125  | 0.00040275  | 0.002497375 |
| 4.8311345   | 5.5264715   | -1.629795    | 0.011041    | 0.031577    |
| 6.022833    | 5.515248    | 1.421668     | 0.005765    | 0.022439    |
| 7.885169167 | 7.101979667 | 1.7443335    | 0.005880667 | 0.019527167 |
| 7.34009     | 6.137778    | 2.3233985    | 0.0062455   | 0.0212135   |
| 5.135415    | 6.732069    | -3.037291667 | 0.000642    | 0.003863    |
| 2.904644    | 3.297581    | -1.313064    | 0.010968    | 0.033306    |
| 10.42969033 | 10.11849667 | 1.241272     | 0.013348    | 0.043194667 |
| 8.072207    | 6.9298435   | 2.207588     | 0.001316    | 0.0074955   |
| 4.854242    | 3.977035    | 1.836816     | 0.011587    | 0.033306    |
| 6.5266625   | 5.245405    | 3.016345     | 0.0059595   | 0.016653    |
| 7.118891667 | 7.906772333 | -1.737355667 | 0.002084    | 0.008037333 |
| 5.290423667 | 4.480028    | 1.755743333  | 0.014518333 | 0.043194667 |
| 8.7925885   | 9.2440095   | -1.3676435   | 0.0121305   | 0.033306    |
| 6.496171    | 4.84727     | 3.135946     | 0.000068    | 0           |
| 5.245094    | 2.8917605   | 5.34923775   | 0.00118     | 0.0071      |
| 8.46097     | 7.725984    | 1.664381     | 0.001254    | 0.00587     |
| 6.572883333 | 7.366823167 | -1.750078667 | 0.002317167 | 0.007800167 |
| 3.777913    | 4.6441395   | -1.8480995   | 0.0088915   | 0.02594825  |



|             |             |             |             |             |
|-------------|-------------|-------------|-------------|-------------|
| 4.912702    | 4.23092     | 1.60412     | 0.000265    | 0.001645    |
| 8.697788    | 7.827602    | 1.827899    | 0.0038      | 0.015015    |
| 6.178335    | 4.710471    | 2.766121    | 0.018072    | 0.048139    |
| 5.7377625   | 6.613632    | -1.8351945  | 0.000102    | 0.000543    |
| 11.205784   | 10.827507   | 1.2999145   | 0.0045615   | 0.0212135   |
| 2.329673    | 4.351042    | -4.681274   | 0.0000855   | 0.000543    |
| 4.956913    | 6.64326     | -3.218407   | 0.001312    | 0.00587     |
| 6.7001475   | 8.0566275   | -2.5831845  | 0.002827    | 0.012068    |
| 6.3347595   | 7.6966275   | -2.5753925  | 0.003709    | 0.012068    |
| 5.334433667 | 5.848409333 | -1.430679   | 0.012       | 0.033306    |
| 3.863147    | 4.573626    | -1.636347   | 0.02103     | 0.048139    |
| 6.675008    | 6.17562     | 1.413614    | 0.013613    | 0.048139    |
| 9.646517    | 10.178746   | -1.446161   | 0.004157    | 0.015015    |
| 6.1070635   | 7.032448    | -1.917523   | 0.0009      | 0.0041015   |
| 4.782686667 | 5.866137    | -2.140327   | 0.002992333 | 0.011807667 |
| 9.674587    | 6.912336    | 6.784544    | 0.000024    | 0           |
| 3.888244    | 4.40109     | -1.426862   | 0.020968    | 0.048139    |
| 2.686343    | 2.416871    | 1.205367    | 0.016903    | 0.048139    |
| 4.301316    | 4.75355     | -1.3681575  | 0.0125925   | 0.035289    |
| 9.395791    | 6.086917    | 9.909925    | 0.000027    | 0           |
| 8.169722    | 5.763553    | 5.30065     | 0.000666    | 0.003863    |
| 4.617177    | 2           | 6.135484    | 0.000327    | 0.002333    |
| 5.695617    | 4.6603965   | 2.052366    | 0.000785    | 0.0041015   |
| 12.0673     | 11.763048   | 1.234779    | 0.000547    | 0.003863    |
| 5.630088    | 6.4368705   | -1.7493845  | 0.0030045   | 0.012068    |
| 7.151712667 | 6.477153333 | 1.599504333 | 0.005259333 | 0.016824    |
| 7.261417    | 5.908428    | 2.554409    | 0.00169     | 0.009121    |
| 4.674092    | 4.151457    | 1.436577    | 0.01684     | 0.048139    |
| 9.523973    | 8.37486     | 2.217774    | 0.000128    | 0.001086    |
| 3.0959715   | 4.2210085   | -2.196415   | 0.004383    | 0.012386    |
| 7.255627    | 6.280556333 | 1.981697    | 0.000334333 | 0.001836    |
| 3.361135    | 3.783012    | -1.339669   | 0.015239    | 0.048139    |
| 5.2747175   | 4.1286095   | 2.2429245   | 0.0016255   | 0.008674    |
| 6.280117    | 7.258616    | -1.970414   | 0.000059    | 0           |
| 7.15406     | 6.3143255   | 1.846994    | 0.0083775   | 0.0270045   |

|             |             |              |             |             |
|-------------|-------------|--------------|-------------|-------------|
| 3.284572    | 3.873253    | -1.503872    | 0.00826     | 0.022439    |
| 4.160951    | 4.780246    | -1.536124    | 0.002973    | 0.009121    |
| 2.839762    | 3.296407    | -1.372346    | 0.010187    | 0.033306    |
| 10.746922   | 10.322598   | 1.341943     | 0.008392    | 0.033306    |
| 5.4425585   | 5.8812595   | -1.355548    | 0.0037595   | 0.01578     |
| 5.160768    | 8.011346    | -7.212896    | 0.000046    | 0           |
| 7.18129     | 3.7074525   | 11.487385    | 0.0048335   | 0.018727    |
| 10.216275   | 5.766063    | 21.859856    | 0.000024    | 0           |
| 2.676697    | 3.784891    | -2.155756    | 0.002178    | 0.009121    |
| 4.855109    | 5.732707    | -1.837313    | 0.001599    | 0.00587     |
| 9.9708315   | 9.534019    | 1.353615     | 0.0076115   | 0.0270045   |
| 12.625621   | 11.926618   | 1.623383     | 0.000053    | 0           |
| 5.717814    | 5.350912    | 1.28958      | 0.019528    | 0.048139    |
| 2.044235    | 2.308571    | -1.201083    | 0.00438     | 0.015015    |
| 3.196237    | 2.535497    | 1.580893     | 0.017894    | 0.048139    |
| 9.576341    | 8.80090725  | 1.7176725    | 0.0000305   | 0           |
| 11.035939   | 11.53308533 | -1.414103    | 0.005847667 | 0.01543     |
| 4.663401    | 5.346142    | -1.605187    | 0.002794    | 0.009121    |
| 9.007654    | 5.403034    | 12.1648575   | 0.000025    | 0           |
| 6.374272    | 5.35806     | 2.022602     | 0.000399    | 0.002333    |
| 6.792492    | 7.383989    | -1.50681     | 0.009781    | 0.033306    |
| 6.610048    | 7.087095    | -1.391891    | 0.019237    | 0.048139    |
| 8.728233    | 7.457757    | 2.475543     | 0.000842    | 0.0045605   |
| 4.238543    | 4.576373    | -1.263855    | 0.015551    | 0.048139    |
| 3.029425    | 5.109787    | -4.229133    | 0.000183    | 0.001645    |
| 9.715866    | 8.944928333 | 1.710545667  | 0.000161333 | 0.000777667 |
| 9.226285    | 8.282946    | 1.922973     | 0.013444    | 0.048139    |
| 10.308751   | 10.04562    | 1.200081     | 0.003213    | 0.015015    |
| 3.199173    | 3.93528     | -1.665676    | 0.000269    | 0.001645    |
| 3.878592333 | 4.586443333 | -1.663261333 | 0.013629667 | 0.035133    |
| 8.276762    | 8.704237    | -1.344878    | 0.00321     | 0.015015    |
| 5.600116    | 6.372369    | -1.707936    | 0.014186    | 0.033306    |
| 5.510389    | 4.794259    | 1.642769     | 0.008771    | 0.033306    |
| 6.855086    | 7.634198    | -1.716074    | 0.003275    | 0.015015    |
| 3.768444    | 3.064921    | 1.628477     | 0.00233     | 0.009121    |

|             |             |             |             |             |
|-------------|-------------|-------------|-------------|-------------|
| 6.78288875  | 5.92596425  | 1.8242325   | 0.00888975  | 0.02781725  |
| 6.963213714 | 7.893724143 | -1.932943   | 0.000101143 | 0.00047     |
| 5.758383    | 6.631274    | -1.831329   | 0.006008    | 0.022439    |
| 5.756094    | 6.650856    | -1.859303   | 0.005214    | 0.015015    |
| 3.691919    | 4.49422     | -1.74388    | 0.016744    | 0.048139    |
| 8.647555    | 7.7924      | 1.808952    | 0.005492    | 0.022439    |
| 8.398535667 | 7.408479333 | 1.988267333 | 0.000387667 | 0.002384333 |
| 8.122971    | 8.579002    | -1.371763   | 0.001309    | 0.00587     |
| 11.037547   | 9.033339    | 4.011685    | 0.000192    | 0.001645    |
| 4.58846625  | 5.66673575  | -2.12157625 | 0.00239925  | 0.00847325  |
| 8.09761025  | 7.127686    | 1.99284625  | 0.0049205   | 0.01953625  |
| 2.291271    | 2.686928    | -1.315541   | 0.011353    | 0.033306    |
| 7.453815    | 6.538623    | 1.885819    | 0.000115    | 0.001086    |
| 4.211183    | 5.1308015   | -1.932688   | 0.0014635   | 0.0045605   |
| 3.158302    | 3.896698    | -1.66832    | 0.004028    | 0.015015    |
| 3.29777625  | 4.90990075  | -3.4471275  | 0.0008355   | 0.00401925  |
| 5.3619544   | 6.4134414   | -2.0982724  | 0.0002598   | 0.0017624   |
| 7.853555    | 4.254119333 | 12.227062   | 0.000711    | 0.004366333 |
| 5.979782    | 7.487634    | -2.843881   | 0.001891    | 0.009439    |
| 9.678453    | 8.886255    | 1.731711    | 0.001181    | 0.00587     |
| 3.844581    | 2.3164235   | 2.892891    | 0.0002165   | 0.001645    |
| 8.411607    | 6.180959    | 4.693446    | 0.004112    | 0.015015    |
| 4.377317333 | 2.886346333 | 2.828239333 | 0.000506    | 0.001956667 |
| 7.967041    | 8.339399    | -1.294467   | 0.009184    | 0.033306    |
| 2.9857345   | 3.8279715   | -1.793429   | 0.003237    | 0.012068    |
| 5.1716635   | 5.9146635   | -1.6829345  | 0.0032945   | 0.0112195   |
| 6.130668    | 5.430688    | 1.624482    | 0.003064    | 0.015015    |
| 6.048769333 | 4.630044333 | 2.692054333 | 0.000048    | 0           |
| 4.172065    | 3.061714    | 2.158982    | 0.001787    | 0.009121    |
| 5.324126    | 6.199576    | -1.83458    | 0.000461    | 0.002333    |
| 2.545103    | 3.067572    | -1.436411   | 0.013121    | 0.033306    |
| 5.82162     | 6.394688    | -1.489519   | 0.001216    | 0.00587     |
| 6.2116855   | 6.6464005   | -1.35174    | 0.020095    | 0.048139    |
| 8.7655      | 9.206905    | -1.357926   | 0.016259    | 0.048139    |
| 6.455577    | 6.922159    | -1.381831   | 0.00629     | 0.022439    |

|             |             |             |             |             |
|-------------|-------------|-------------|-------------|-------------|
| 10.090661   | 9.607859    | 1.397456    | 0.01018     | 0.033306    |
| 4.733791    | 3.69504     | 2.0545505   | 0.0061415   | 0.0212135   |
| 6.684783    | 7.512008    | -1.774269   | 0.000213    | 0.001645    |
| 8.38281     | 7.698436    | 1.607004    | 0.001124    | 0.00587     |
| 5.306188    | 5.861393    | -1.469378   | 0.00088     | 0.003863    |
| 3.6419225   | 2.233564    | 2.7088005   | 0.0063775   | 0.022439    |
| 3.188753    | 4.162505    | -1.963942   | 0.000486    | 0.002333    |
| 7.199323    | 6.5215225   | 1.6003195   | 0.0013035   | 0.0074955   |
| 5.285377667 | 4.569443667 | 1.663008    | 0.001464667 | 0.008249333 |
| 6.896373    | 6.524982    | 1.294218    | 0.015115    | 0.0407225   |
| 9.316695    | 8.0903      | 2.339816    | 0.000069    | 0           |
| 5.633461    | 5.976479    | -1.268408   | 0.013963    | 0.033306    |
| 3.996089    | 4.579015    | -1.497884   | 0.017407    | 0.048139    |
| 5.904986    | 5.044742    | 1.815345    | 0.000389    | 0.002333    |
| 8.307423    | 7.427107    | 1.840779    | 0.000622    | 0.003863    |
| 3.234973    | 2.062545    | 2.253908    | 0.006658    | 0.022439    |
| 8.808302    | 7.949573    | 1.813439    | 0.009514    | 0.033306    |
| 2.059725    | 2.6875445   | -1.54578    | 0.0003845   | 0.002754    |
| 9.854564    | 9.364907    | 1.40411     | 0.001199    | 0.00587     |
| 8.60048     | 6.527736    | 4.206861    | 0.000281    | 0.002333    |
| 5.73993     | 6.249271    | -1.4234     | 0.019417    | 0.048139    |
| 7.864756    | 8.265211    | -1.319924   | 0.007132    | 0.022439    |
| 8.652367    | 8.226774    | 1.343124    | 0.010548    | 0.033306    |
| 7.341642    | 7.892561    | -1.465018   | 0.015638    | 0.048139    |
| 8.876433    | 9.243825    | -1.290018   | 0.015242    | 0.048139    |
| 10.611822   | 10.272197   | 1.265428    | 0.018374    | 0.048139    |
| 2.998355333 | 3.909802    | -1.9181     | 0.005900333 | 0.016099    |
| 3.294959    | 4.253307    | -1.943084   | 0.007245    | 0.022439    |
| 6.735381    | 5.156213    | 3.060789667 | 0.000162    | 0.000777667 |
| 6.2162275   | 4.690329    | 2.927601    | 0.0000925   | 0.000543    |
| 3.0804735   | 3.6988565   | -1.535907   | 0.001824    | 0.006492    |
| 4.300627    | 3.222109    | 2.192635    | 0.0056275   | 0.0241605   |
| 3.920183    | 5.163739    | -2.367815   | 0.000274    | 0.002333    |
| 4.399663    | 3.383674    | 2.022288    | 0.006023    | 0.022439    |
| 5.512232    | 4.682169    | 1.777762    | 0.003642    | 0.015015    |

|             |             |             |             |            |
|-------------|-------------|-------------|-------------|------------|
| 3.9098185   | 4.6339935   | -1.6533835  | 0.011401    | 0.035289   |
| 8.472128333 | 7.041637667 | 2.702327667 | 7.36667E-05 | 0.000362   |
| 7.5076535   | 6.9341785   | 1.4883535   | 0.005645    | 0.0241605  |
| 6.35601625  | 5.0956955   | 2.50553275  | 0.0020415   | 0.00938625 |
| 8.751056    | 7.085238    | 3.172937    | 0.000044    | 0          |
| 9.0002995   | 7.9670425   | 2.0484625   | 0.000589    | 0.0041015  |
| 3.961082    | 3.511377    | 1.365761    | 0.011273    | 0.033306   |
| 7.09181     | 6.355508    | 1.6659      | 0.020826    | 0.048139   |
| 6.692178    | 5.213374    | 2.8330405   | 0.003211    | 0.012068   |
| 2.3594045   | 3.518604    | -2.2510925  | 0.0048175   | 0.0185845  |
| 2.626582    | 3.1510315   | -1.4385925  | 0.0028405   | 0.0104425  |
| 7.833992    | 6.171598    | 3.165412    | 0.003438    | 0.015015   |
| 5.145404    | 4.577316    | 1.482557    | 0.010732    | 0.033306   |
| 6.58133     | 5.91158     | 1.590797    | 0.012965    | 0.048139   |
| 8.990089    | 8.511083    | 1.393783    | 0.000907    | 0.00587    |
| 3.8237755   | 4.566849    | -1.67387    | 0.0020285   | 0.0074955  |
| 3.371572    | 2.860572    | 1.425038    | 0.00039     | 0.002333   |
| 2.064613    | 2.346829    | -1.216062   | 0.020819    | 0.048139   |
| 6.927388    | 2.042654    | 29.542786   | 0.000024    | 0          |
| 5.713821    | 6.215358    | -1.415721   | 0.009013    | 0.022439   |
| 2.000791    | 2.268458    | -1.203859   | 0.003976    | 0.015015   |
| 3.190823    | 3.972995    | -1.719718   | 0.000094    | 0.001086   |
| 6.985164    | 6.240406    | 1.675694    | 0.006323    | 0.022439   |
| 8.074313    | 7.0888815   | 1.980329    | 0.010471    | 0.0407225  |
| 6.05481     | 5.368778    | 1.608852    | 0.01673     | 0.048139   |
| 8.596889    | 7.803608    | 1.73538     | 0.000555    | 0.003098   |
| 2.087124    | 2.552007    | -1.380206   | 0.021482    | 0.048139   |
| 12.1573125  | 10.632781   | 2.883898    | 0.000024    | 0          |
| 2.793574    | 3.246502    | -1.368815   | 0.017871    | 0.048139   |
| 3.992352    | 5.2491105   | -2.389812   | 0.005115    | 0.018727   |
| 8.661607    | 8.193033    | 1.383741    | 0.019692    | 0.048139   |
| 7.949486    | 7.391798    | 1.471909    | 0.000158    | 0.001086   |
| 2.077119    | 2.394469    | -1.246039   | 0.012753    | 0.033306   |
| 6.003462    | 5.155216    | 1.800311    | 0.012685    | 0.048139   |
| 8.3366475   | 10.1349725  | -3.513914   | 0.0005015   | 0.002754   |

|             |             |             |             |           |
|-------------|-------------|-------------|-------------|-----------|
| 9.628048    | 9.16474     | 1.378699    | 0.010688    | 0.033306  |
| 6.786249    | 7.286419    | -1.4147095  | 0.0133105   | 0.035289  |
| 10.73524933 | 9.520518    | 2.348925333 | 0.004127333 | 0.015737  |
| 7.565909    | 6.581442    | 1.978582    | 0.003179    | 0.015015  |
| 11.708311   | 11.2520505  | 1.371988    | 0.014442    | 0.0407225 |
| 8.041343    | 7.646549    | 1.314755    | 0.012768    | 0.048139  |
| 4.906546    | 2.701081    | 4.612232    | 0.008824    | 0.033306  |
| 2.579507    | 2.890251    | -1.240347   | 0.001085    | 0.00587   |
| 2.1995525   | 3.8046905   | -3.3682205  | 0.000887    | 0.0045605 |
| 2.939208    | 4.271352    | -2.517765   | 0.000856    | 0.003863  |
| 2.392503    | 2.975258    | -1.497707   | 0.002679    | 0.009121  |
| 7.916553    | 6.531137    | 2.612472    | 0.000299    | 0.002333  |
| 8.2999685   | 7.6192965   | 1.6028885   | 0.00112     | 0.00587   |
| 5.4677082   | 6.2544248   | -1.7435014  | 0.0012984   | 0.0061888 |
| 5.32911     | 6.124983    | -1.736128   | 0.002032    | 0.009121  |
| 4.321506    | 5.732483    | -2.659171   | 0.000032    | 0         |
| 5.7889725   | 6.423375    | -1.5644725  | 0.0046325   | 0.0141545 |
| 9.195449    | 6.993988    | 4.599449    | 0.000024    | 0         |
| 5.861637    | 4.056835    | 3.49381     | 0.000139    | 0.001086  |
| 10.28593117 | 9.015037833 | 2.416109    | 3.93333E-05 | 0         |
| 8.3157342   | 7.1865678   | 2.1942818   | 0.001576    | 0.0075464 |
| 2.223896    | 2.502877    | -1.213338   | 0.020424    | 0.048139  |
| 6.164154    | 5.623816    | 1.454313    | 0.010555    | 0.033306  |
| 4.342261    | 4.811871    | -1.384735   | 0.00591     | 0.022439  |
| 6.293642    | 5.557139    | 1.666132    | 0.003094    | 0.015015  |
| 3.769411    | 2.803189    | 1.953718    | 0.002888    | 0.015015  |
| 9.09012     | 9.83658     | -1.677672   | 0.012414    | 0.033306  |
| 2.50507     | 2.202345    | 1.233472    | 0.005697    | 0.022439  |
| 9.0994      | 8.3973195   | 1.6270765   | 0.0016935   | 0.00833   |
| 8.028341    | 7.520115    | 1.422301    | 0.00013     | 0.001086  |
| 6.068311    | 7.444121    | -2.595136   | 0.001089    | 0.00587   |
| 3.082395    | 3.8721055   | -1.743472   | 0.006278    | 0.0241605 |
| 5.76848     | 6.303911    | -1.449375   | 0.004034    | 0.015015  |
| 3.081069    | 3.978922    | -1.863291   | 0.002565    | 0.009121  |
| 3.022345    | 3.704644    | -1.604695   | 0.004543    | 0.015015  |

|                  |                  |                  |                 |             |
|------------------|------------------|------------------|-----------------|-------------|
| 4.58511          | 5.080153         | -1.409362        | 0.010408        | 0.033306    |
| 6.267404         | 6.859062         | -1.506978        | 0.003667        | 0.015015    |
| 7.232179         | 6.477704         | 1.687017         | 0.010227        | 0.033306    |
| 2.189654         | 2.629311         | -1.356281        | 0.017975        | 0.048139    |
| 5.596289         | 2.679192         | 7.553247         | 0.000032        | 0           |
| 6.34429          | 5.616121         | 1.656535         | 0.000834        | 0.00587     |
| 3.097424         | 3.8985           | -1.7424          | 0.001915        | 0.009121    |
| 6.54274825       | 4.19178975       | 6.0444115        | 0.00199125      | 0.0083265   |
| 2.691683         | 2.090622         | 1.516832         | 0.018954        | 0.048139    |
| 3.5693875        | 4.174188         | -1.521562        | 0.0046785       | 0.01578     |
| 2.321376         | 3.5516835        | -2.402426        | 0.0000365       | 0           |
| 5.2877665        | 6.095162         | -1.752762        | 0.004221        | 0.015015    |
| <b>10.914821</b> | <b>8.5344335</b> | <b>5.2608825</b> | <b>0.000024</b> | <b>0</b>    |
| 2.22433          | 2.848985         | -1.541842        | 0.005062        | 0.015015    |
| 4.877613         | 5.654500667      | -1.722199        | 0.004468333     | 0.015525    |
| 9.439225         | 8.812336         | 1.544231         | 0.005045        | 0.022439    |
| 6.062206         | 4.775363         | 2.439935         | 0.001767        | 0.009121    |
| 4.478233         | 5.166371         | -1.611203        | 0.000116        | 0.001086    |
| 8.95477          | 8.307261         | 1.566461         | 0.015121        | 0.048139    |
| 3.938279         | 4.78328          | -1.796265        | 0.001548        | 0.00587     |
| 5.4795765        | 3.788816         | 3.2957725        | 0.0005845       | 0.0041015   |
| 5.7119545        | 4.182611         | 3.021547         | 0.007119        | 0.02863     |
| 6.275064         | 5.553928         | 1.64848          | 0.00205         | 0.009121    |
| 2.493832         | 2.091569         | 1.32158          | 0.016318        | 0.048139    |
| 10.717716        | 9.873127         | 1.795753         | 0.00198         | 0.009121    |
| 7.9066885        | 5.9670345        | 3.8890385        | 0.0005845       | 0.002935    |
| 5.7785485        | 6.7095425        | -1.9393345       | 0.005326        | 0.019588    |
| 10.453532        | 9.874531         | 1.493815         | 0.000183        | 0.001645    |
| 6.487317         | 4.97112          | 2.86036          | 0.000076        | 0           |
| 2.357252         | 3.362151         | -2.006804        | 0.00004         | 0           |
| 2.62001          | 4.020441         | -2.639805        | 0.000388        | 0.002333    |
| 3.831264         | 4.379028         | -1.461817        | 0.002548        | 0.009121    |
| 2.276145         | 2.846225         | -1.484606        | 0.011182        | 0.033306    |
| 3.463498         | 5.221585333      | -3.472007333     | 0.008246        | 0.025482667 |
| 3.2851255        | 5.86174          | -6.0593515       | 0.000059        | 0           |

|             |             |              |             |             |
|-------------|-------------|--------------|-------------|-------------|
| 8.275657    | 7.812062    | 1.379543     | 0.0006065   | 0.0041015   |
| 8.1025345   | 8.893295    | -1.7302655   | 0.011355    | 0.031577    |
| 6.651162    | 7.312672    | -1.581738    | 0.004174    | 0.015015    |
| 4.921604    | 5.646813    | -1.65314     | 0.0027      | 0.009121    |
| 4.477371    | 5.271559    | -1.734101    | 0.002547    | 0.009121    |
| 4.719928    | 5.491612    | -1.707262    | 0.008575    | 0.022439    |
| 9.27885375  | 10.1194935  | -1.82538825  | 0.00026075  | 0.00167725  |
| 7.533228    | 8.5917055   | -2.0833595   | 0.0001345   | 0.0013655   |
| 8.085083667 | 8.458754    | -1.297529    | 0.004347667 | 0.013560333 |
| 5.9809975   | 6.516245    | -1.456033    | 0.003809    | 0.012042    |
| 8.946883    | 6.416147    | 5.950183     | 0.0000635   | 0           |
| 7.002185    | 7.764044667 | -1.701832667 | 0.002481667 | 0.010002    |
| 5.90606525  | 2.733389    | 10.096352    | 0.0003965   | 0.00228025  |
| 8.014703    | 7.351124    | 1.584007     | 0.001298    | 0.00587     |
| 3.264293    | 2.841918    | 1.340132     | 0.011554    | 0.033306    |
| 3.642819    | 2.757712    | 1.8469       | 0.001895    | 0.009121    |
| 5.047393    | 6.610614    | -2.955128    | 0.000213    | 0.001645    |
| 11.618433   | 11.325581   | 1.225059     | 0.00784     | 0.033306    |
| 3.887194    | 4.436914667 | -1.475269333 | 0.007701667 | 0.026566333 |
| 6.337595    | 8.529573    | -4.569314    | 0.000119    | 0.001086    |
| 6.74849     | 3.467251    | 9.72191      | 0.000042    | 0           |
| 12.037475   | 10.931988   | 2.151716     | 0.002044    | 0.009121    |
| 7.506093    | 10.362978   | -7.244496    | 0.007681    | 0.022439    |
| 8.808613    | 8.529652    | 1.213321     | 0.001382    | 0.00587     |
| 5.022052    | 3.5524145   | 2.770894     | 0.000463    | 0.002935    |
| 6.943373    | 7.795935    | -1.805704    | 0.011622    | 0.033306    |
| 9.309095    | 7.032564    | 4.845116     | 0.000212    | 0.001645    |
| 10.339069   | 8.676714    | 3.165326     | 0.00014     | 0.001086    |
| 6.454673    | 5.825553    | 1.546622     | 0.003681    | 0.015015    |
| 11.00573    | 9.4376345   | 2.9730455    | 0.0007545   | 0.0041015   |
| 9.939983    | 9.07996     | 1.815067     | 0.000066    | 0           |
| 2.213574    | 2.6236615   | -1.3289965   | 0.009607    | 0.02863     |
| 4.300256    | 3.173388    | 2.183841     | 0.020835    | 0.048139    |
| 4.649002    | 5.31099     | -1.5875445   | 0.006333    | 0.022439    |
| 6.072451    | 3.8133225   | 4.813271     | 0.00005     | 0           |



|             |             |             |             |             |
|-------------|-------------|-------------|-------------|-------------|
| 7.820670333 | 6.004675333 | 3.620341667 | 0.000131333 | 0.000777667 |
| 9.719841    | 9.086802    | 1.550828    | 0.016432    | 0.048139    |
| 8.6938845   | 9.7631605   | -2.0983855  | 0.015033    | 0.048139    |
| 3.115930333 | 4.048019    | -1.909279   | 0.012776333 | 0.039572333 |
| 5.595932    | 3.670879    | 3.797508    | 0.010719    | 0.033306    |
| 12.013897   | 11.718151   | 1.22752     | 0.01033     | 0.033306    |
| 3.4171435   | 3.98037     | -1.489224   | 0.011115    | 0.0270045   |
| 5.660167    | 4.731886    | 1.903008    | 0.004091    | 0.015015    |
| 5.326967    | 3.920354    | 2.651142    | 0.010709    | 0.033306    |
| 2.493802    | 2.197039    | 1.228385    | 0.01727     | 0.048139    |
| 5.09926325  | 4.4466065   | 1.595923    | 0.005589    | 0.01829675  |
| 3.9201665   | 4.9909165   | -2.131635   | 0.0029055   | 0.008674    |
| 6.272788    | 5.4679205   | 1.7473265   | 0.002991    | 0.015015    |
| 4.508344    | 5.097741    | -1.504618   | 0.016247    | 0.048139    |
| 4.0606      | 2.946348    | 2.1688435   | 0.010366    | 0.02863     |
| 6.095182    | 5.527642    | 1.481994    | 0.019824    | 0.048139    |
| 4.596165    | 5.367673    | -1.707053   | 0.007996    | 0.022439    |
| 8.959603    | 9.554175    | -1.519179   | 0.0010205   | 0.0051035   |
| 3.820197    | 5.080085    | -2.394772   | 0.000329    | 0.002333    |
| 8.347516    | 7.27446     | 2.103885    | 0.002642    | 0.015015    |
| 4.8810425   | 5.7145995   | -1.786822   | 0.0013995   | 0.0074955   |
| 2.383587    | 3.49276     | -2.157219   | 0.000041    | 0           |
| 3.885835    | 2.868594    | 2.024044    | 0.005622    | 0.022439    |
| 3.744555    | 3.172134    | 1.487017    | 0.000553    | 0.003863    |
| 7.3595475   | 6.6897045   | 1.5943235   | 0.00099     | 0.0051035   |
| 4.734906    | 4.340203    | 1.314672    | 0.001002    | 0.00587     |
| 4.127217    | 4.811092    | -1.606449   | 0.012679    | 0.033306    |
| 6.284603    | 7.21896     | -1.911039   | 0.003028    | 0.009121    |
| 2.573009    | 2.128232    | 1.361103    | 0.00655     | 0.022439    |
| 8.515222    | 8.075758    | 1.3575465   | 0.005853    | 0.022439    |
| 3.07811     | 3.69311     | -1.531558   | 0.005364    | 0.015015    |
| 2.722105    | 3.681792    | -1.944887   | 0.000142    | 0.001086    |
| 2.201715    | 2.483642    | -1.215818   | 0.015021    | 0.048139    |
| 6.354029    | 5.718402    | 1.555120667 | 0.006858333 | 0.018003    |
| 3.891441    | 5.136707    | -2.3959625  | 0.002841    | 0.0117625   |

|             |             |            |             |             |
|-------------|-------------|------------|-------------|-------------|
| 5.4424135   | 5.945142    | -1.4169005 | 0.0124675   | 0.035289    |
| 5.4134765   | 3.8069335   | 3.492159   | 0.0123835   | 0.035289    |
| 9.207418    | 8.761392    | 1.362282   | 0.008551    | 0.033306    |
| 10.0763385  | 9.350225    | 1.6560575  | 0.0003085   | 0.0019315   |
| 3.650005    | 2.434175    | 2.326332   | 0.0097665   | 0.0270045   |
| 2.396009    | 3.020337    | -1.541493  | 0.008179    | 0.022439    |
| 8.610937    | 8.086122    | 1.43875    | 0.005081    | 0.022439    |
| 10.089238   | 8.407722    | 3.20765    | 0.000029    | 0           |
| 4.309740667 | 2.894890667 | 2.857557   | 0.004206333 | 0.012198667 |
| 8.6713865   | 9.211602    | -1.454318  | 0.015624    | 0.0407225   |
| 5.901383    | 3.931176    | 3.918244   | 0.002218    | 0.009121    |
| 7.54456     | 6.6909755   | 1.814714   | 0.007017    | 0.0270045   |
| 4.268975    | 5.278145    | -2.015038  | 0.0007295   | 0.003863    |
| 8.456861667 | 6.865446333 | 3.023314   | 0.000741    | 0.004275333 |
| 10.534891   | 10.189065   | 1.270879   | 0.006094    | 0.022439    |
| 2.259948    | 2.902732    | -1.561339  | 0.006313    | 0.022439    |
| 7.578044    | 7.040529    | 1.451471   | 0.01524     | 0.048139    |
| 5.9966385   | 5.012741    | 2.1073585  | 0.0000445   | 0           |
| 5.229784    | 6.279761    | -2.070496  | 0.001902    | 0.009121    |
| 8.614116    | 7.9978      | 1.532956   | 0.000519    | 0.003863    |
| 8.274142    | 8.7673755   | -1.408726  | 0.00295     | 0.012068    |
| 9.610386    | 8.759319    | 1.803835   | 0.000052    | 0           |
| 8.807693    | 7.980708    | 1.773975   | 0.001515    | 0.009121    |
| 5.950607    | 4.986221    | 1.951233   | 0.008965    | 0.033306    |
| 9.941192    | 8.852631    | 2.126618   | 0.008692    | 0.033306    |
| 8.286508    | 7.5019915   | 1.7254695  | 0.000485    | 0.002935    |
| 4.684081    | 5.21301     | -1.444765  | 0.011382    | 0.035289    |
| 2.123801    | 2.78538     | -1.581813  | 0.004357    | 0.015015    |
| 3.7235015   | 4.271745    | -1.4635605 | 0.008541    | 0.0278725   |
| 7.248925    | 8.416576    | -2.246455  | 0.003697    | 0.015015    |
| 2.688221    | 3.552237    | -1.820512  | 0.00141     | 0.0051035   |
| 8.1257565   | 6.3162155   | 3.517079   | 0.0029325   | 0.012068    |
| 4.4312435   | 3.7101435   | 1.6565575  | 0.000651    | 0.002935    |
| 3.077942    | 4.292793    | -2.321168  | 0.001097    | 0.00587     |
| 2.525973    | 3.306325    | -1.71755   | 0.02024     | 0.048139    |

|             |             |             |             |             |
|-------------|-------------|-------------|-------------|-------------|
| 8.1540035   | 7.4425195   | 1.6378135   | 0.0051025   | 0.019588    |
| 5.083226667 | 2.082934    | 8.245811667 | 0.006343    | 0.023586667 |
| 9.165197    | 8.7093055   | 1.374063    | 0.00204     | 0.009121    |
| 7.602568    | 5.807049    | 3.471403    | 0.000067    | 0           |
| 3.682399333 | 5.567696667 | -3.725389   | 0.000218667 | 0.001688    |
| 9.701141333 | 8.667793    | 2.050908667 | 0.000117333 | 0.000910333 |
| 3.8954178   | 4.6231368   | -1.6727936  | 0.002849    | 0.0081176   |
| 4.903032    | 4.530984    | 1.294188    | 0.003842    | 0.015015    |
| 9.165043    | 8.249269    | 1.88658     | 0.003746    | 0.015015    |
| 5.16684     | 5.564159    | -1.3186095  | 0.0054655   | 0.018727    |
| 12.188057   | 9.323764    | 7.281793    | 0.000025    | 0           |
| 6.557804    | 5.919172    | 1.556852    | 0.018749    | 0.048139    |
| 8.577889    | 8.124457    | 1.369294    | 0.007336    | 0.022439    |
| 4.29265875  | 4.90042575  | -1.541558   | 0.0038985   | 0.0100655   |
| 6.628845333 | 5.428638    | 2.326829667 | 0.001490333 | 0.007323667 |
| 3.9646145   | 5.2190005   | -2.500246   | 0.00452525  | 0.01494375  |
| 3.903859    | 5.19518     | -2.44752    | 0.005368    | 0.015015    |
| 6.753411    | 6.054272    | 1.623535    | 0.003698    | 0.015015    |
| 2.081016    | 2.934662    | -1.807062   | 0.000112    | 0.001086    |
| 5.346314    | 4.817981    | 1.442262    | 0.015093    | 0.048139    |
| 3.783305    | 4.525968    | -1.673261   | 0.007336    | 0.022439    |
| 8.866114667 | 7.683712    | 2.271458    | 0.000274667 | 0.002198    |
| 7.0017045   | 5.8837685   | 2.1708615   | 0.000216    | 0.001645    |
| 7.010178    | 7.638695    | -1.545975   | 0.005071    | 0.015015    |
| 3.66281     | 4.303744    | -1.559338   | 0.013128    | 0.033306    |
| 4.427795    | 3.982096    | 1.361974    | 0.014819    | 0.048139    |
| 6.83757725  | 7.59762725  | -1.70311575 | 0.0079015   | 0.02492175  |
| 4.4172865   | 2.7423415   | 3.301003    | 0.0057675   | 0.019588    |
| 7.971269    | 7.544202    | 1.344498    | 0.018185    | 0.048139    |
| 7.8339135   | 6.905741    | 1.904229    | 0.0017135   | 0.008674    |
| 8.408644    | 8.054161    | 1.2793695   | 0.00729     | 0.0278725   |
| 5.6232005   | 3.208079    | 5.3733815   | 0.0038385   | 0.018727    |
| 10.633616   | 9.057126    | 2.982434    | 0.000024    | 0           |
| 6.124871    | 9.1359355   | -8.0981045  | 0.0000415   | 0           |
| 5.917076    | 6.532007    | -1.538238   | 0.001688333 | 0.006961667 |

|             |             |              |             |             |
|-------------|-------------|--------------|-------------|-------------|
| 5.21126975  | 4.37531325  | 1.81940975   | 0.0052875   | 0.019546    |
| 4.0952035   | 5.076383    | -1.990436    | 0.002494    | 0.0080505   |
| 8.417852    | 9.136285    | -1.645394    | 0.000146    | 0.001086    |
| 2.648166    | 3.589928    | -1.920872    | 0.000025    | 0           |
| 8.763002167 | 6.7486055   | 4.254538167  | 2.68333E-05 | 0           |
| 6.4875075   | 5.5841085   | 1.9262635    | 0.004586    | 0.016653    |
| 5.061884    | 5.554293    | -1.406792    | 0.006741    | 0.022439    |
| 3.021201    | 3.777144    | -1.688735    | 0.012931    | 0.033306    |
| 5.116168    | 5.7321745   | -1.534543    | 0.0023165   | 0.0104425   |
| 7.525423333 | 6.900761    | 1.543583333  | 0.001094333 | 0.006953667 |
| 5.9191015   | 4.2612875   | 3.1857035    | 0.002647    | 0.0104425   |
| 7.459456    | 7.093243    | 1.288965     | 0.001697    | 0.009121    |
| 5.738999667 | 6.339142333 | -1.518641333 | 0.002429333 | 0.008593667 |
| 2.931547    | 3.770612    | -1.78889     | 0.000061    | 0           |
| 9.842313    | 9.457396    | 1.305784     | 0.005192    | 0.022439    |
| 7.67529275  | 6.90800575  | 1.746839     | 0.00094475  | 0.00457625  |
| 4.5937715   | 2.347974    | 5.7206945    | 0.000202    | 0.0011665   |
| 4.542823    | 5.249871    | -1.632461    | 0.004455    | 0.015015    |
| 2.714645    | 4.178422    | -2.758297    | 0.000099    | 0.001086    |
| 2.167266    | 2.828214    | -1.581121    | 0.000872    | 0.003863    |
| 7.914429333 | 6.338461333 | 3.032185667  | 0.000803667 | 0.004366333 |
| 6.80161     | 6.244699    | 1.471116     | 0.020826    | 0.048139    |
| 5.956899    | 5.537634    | 1.337245     | 0.005199    | 0.022439    |
| 9.595242    | 9.170724    | 1.342124     | 0.004057    | 0.015015    |
| 3.64297     | 4.228871    | -1.500975    | 0.02113     | 0.048139    |
| 6.22018     | 6.741185    | -1.434955    | 0.005326    | 0.015015    |
| 7.224572    | 6.486421    | 1.668036     | 0.008515    | 0.033306    |
| 2.686863    | 2.290826    | 1.315889     | 0.019056    | 0.048139    |
| 3.81028     | 4.181822    | -1.293735    | 0.018331    | 0.048139    |
| 6.041045    | 6.651598    | -1.5307915   | 0.0063645   | 0.018727    |
| 10.270607   | 9.523886    | 1.677974     | 0.000137    | 0.001086    |
| 10.989847   | 10.4923     | 1.411811     | 0.000275    | 0.002333    |
| 10.9722035  | 9.1785565   | 3.57911      | 0.000025    | 0           |
| 9.48159     | 8.099966    | 2.605755     | 0.000156    | 0.0008225   |
| 3.359986    | 4.390828    | -2.043217    | 0.01746     | 0.048139    |

|             |             |              |             |             |
|-------------|-------------|--------------|-------------|-------------|
| 4.625095    | 5.334441    | -1.640476667 | 0.004435667 | 0.016884667 |
| 6.9960205   | 5.28227     | 3.280184     | 0.000201    | 0.0011665   |
| 4.590836    | 5.78719475  | -2.3865185   | 0.0021695   | 0.0095105   |
| 3.719293    | 2.906206    | 1.756967     | 0.004583    | 0.022439    |
| 4.399711    | 3.296739    | 2.147967     | 0.001234    | 0.00587     |
| 6.753548    | 7.129113    | -1.297347    | 0.011781    | 0.033306    |
| 10.952032   | 10.542824   | 1.327957     | 0.001676    | 0.009121    |
| 3.5047515   | 4.7499595   | -2.4733095   | 0.0002395   | 0.0011665   |
| 9.367838    | 8.210072    | 2.231117     | 0.001261    | 0.00587     |
| 6.65373     | 5.432212    | 2.331921     | 0.000317    | 0.002333    |
| 5.431205    | 6.31358     | -1.843408    | 0.015654    | 0.048139    |
| 6.57527625  | 8.15721975  | -3.124953    | 0.0012255   | 0.005886    |
| 2.325084    | 3.318803    | -1.991311    | 0.000276    | 0.002333    |
| 5.102352    | 6.054737    | -1.935069    | 0.00112     | 0.00587     |
| 8.280517333 | 9.602032333 | -2.518110667 | 4.46667E-05 | 0           |
| 6.116062    | 3.07411     | 12.68956367  | 0.002600667 | 0.009129333 |
| 4.006597    | 3.253038    | 1.685947     | 0.001674    | 0.009121    |
| 9.2867225   | 8.0867      | 2.2976585    | 0.0052855   | 0.022439    |
| 3.810227    | 4.235819    | -1.343123    | 0.011874    | 0.033306    |
| 8.371629    | 7.403669    | 1.956073     | 0.00025     | 0.001645    |
| 9.884707    | 9.301685    | 1.497985     | 0.002779    | 0.015015    |
| 2.290952    | 5.938630333 | -14.12422333 | 0.000024    | 0           |
| 8.778749667 | 7.44173     | 2.565734667  | 0.00019     | 0.001139667 |
| 4.761883    | 3.595211    | 2.298853667  | 0.005001667 | 0.015015333 |
| 4.427036    | 3.989698    | 1.354103     | 0.017263    | 0.048139    |
| 2.98198     | 3.5110015   | -1.451255    | 0.0046235   | 0.018727    |
| 6.804395    | 7.510537333 | -1.633176667 | 0.004543667 | 0.015015    |
| 4.396348667 | 6.572957667 | -4.599637667 | 0.001179333 | 0.005105667 |
| 9.311950333 | 8.409955333 | 1.872723667  | 7.06667E-05 | 0.000362    |
| 5.190723    | 2.76219     | 5.383457     | 0.000586    | 0.003863    |
| 2.895229    | 3.463167    | -1.482403    | 0.008691    | 0.022439    |
| 6.0553568   | 7.1252092   | -2.1470252   | 0.00102     | 0.0038656   |
| 5.928302333 | 7.076271333 | -2.234434333 | 0.012203    | 0.032153333 |
| 4.52688775  | 3.06329225  | 2.96369425   | 0.0026555   | 0.009629    |
| 5.013559    | 2.345838    | 6.354247     | 0.002021    | 0.009121    |

|            |             |              |             |             |
|------------|-------------|--------------|-------------|-------------|
| 6.359782   | 6.018075    | 1.267255     | 0.020747    | 0.048139    |
| 7.1232165  | 5.619764    | 2.9083035    | 0.0001465   | 0.0008225   |
| 4.739242   | 3.8665      | 1.8376075    | 0.0052265   | 0.0241605   |
| 4.67794075 | 3.41501575  | 2.84940575   | 0.00081     | 0.004159    |
| 10.802615  | 9.790235    | 2.017236     | 0.000035    | 0           |
| 3.76771    | 4.312506    | -1.458814    | 0.001143    | 0.00587     |
| 8.45676    | 7.648214    | 1.751446     | 0.003611    | 0.015015    |
| 10.193388  | 9.819926    | 1.295743     | 0.004679    | 0.018727    |
| 7.691205   | 6.689728    | 2.002049     | 0.000059    | 0           |
| 9.371103   | 8.453529    | 1.888936     | 0.000049    | 0           |
| 10.979518  | 9.578032    | 2.641735     | 0.000026    | 0           |
| 5.076228   | 3.976501    | 2.143142     | 0.000248    | 0.001645    |
| 4.0874     | 4.780736    | -1.617018    | 0.003216    | 0.015015    |
| 6.975807   | 7.7687525   | -1.739535    | 0.0041245   | 0.012386    |
| 6.510482   | 7.053907667 | -1.459665333 | 0.013497333 | 0.037097667 |
| 5.8582725  | 5.3394195   | 1.433687     | 0.0043085   | 0.0174755   |
| 6.284715   | 5.849309    | 1.352292     | 0.017955    | 0.048139    |
| 7.063203   | 6.271249    | 1.731418     | 0.006675    | 0.022439    |
| 5.1640365  | 5.7540855   | -1.50747     | 0.008102    | 0.0212135   |
| 3.142826   | 3.7091715   | -1.481365    | 0.0066465   | 0.019588    |
| 9.930398   | 9.340535    | 1.505103     | 0.002586    | 0.015015    |
| 6.64657    | 7.392266    | -1.676783    | 0.010581    | 0.033306    |
| 7.529495   | 7.20797     | 1.249651     | 0.018712    | 0.048139    |
| 7.366216   | 7.73345     | -1.289878    | 0.020144    | 0.048139    |
| 3.974104   | 3.220583    | 1.685902     | 0.001304    | 0.00587     |
| 5.652877   | 4.1688135   | 3.0603445    | 0.000967    | 0.0045605   |
| 4.179985   | 3.245136    | 1.91169      | 0.007325    | 0.022439    |
| 5.487402   | 4.932424    | 1.469147     | 0.009076    | 0.033306    |
| 9.424678   | 8.46707     | 1.942087     | 0.000029    | 0           |
| 5.982102   | 5.264423    | 1.644534     | 0.006405    | 0.022439    |
| 4.988818   | 4.081256    | 1.875873     | 0.000269    | 0.001645    |
| 10.719192  | 9.454364    | 2.402986     | 0.000167    | 0.001645    |
| 4.7702618  | 5.4253958   | -1.6114444   | 0.002802    | 0.0093486   |
| 5.042426   | 4.541112    | 1.415502     | 0.007385    | 0.022439    |
| 3.790908   | 4.49601     | -1.63026     | 0.000481    | 0.002333    |

|             |             |              |             |             |
|-------------|-------------|--------------|-------------|-------------|
| 4.71819     | 5.310172    | -1.507316    | 0.008596    | 0.022439    |
| 5.618202    | 4.540928    | 2.110045     | 0.00031     | 0.002333    |
| 3.478912    | 4.232802    | -1.686334    | 0.001243    | 0.00587     |
| 5.540747667 | 6.399010333 | -1.833016    | 0.002845333 | 0.01001     |
| 5.460019    | 6.079442    | -1.53626     | 0.006014    | 0.022439    |
| 6.8162195   | 6.280581    | 1.4501425    | 0.006948    | 0.0278725   |
| 2.297692    | 2.921032    | -1.540438    | 0.000769    | 0.003863    |
| 6.013465    | 6.530507    | -1.431018    | 0.020984    | 0.048139    |
| 5.525215    | 6.212294    | -1.615568    | 0.013832    | 0.0407225   |
| 3.834356333 | 4.283229667 | -1.365655333 | 0.011415    | 0.035133    |
| 6.742691667 | 7.463988    | -1.659683667 | 0.001109    | 0.004366333 |
| 7.292234    | 6.606293    | 1.608752     | 0.000295    | 0.002333    |
| 2.917645    | 3.828274    | -1.879865    | 0.007441    | 0.022439    |
| 8.251427    | 7.7903245   | 1.3815665    | 0.0056225   | 0.0185845   |
| 2.52801     | 3.844115    | -2.48993     | 0.000308    | 0.002333    |
| 6.087803    | 5.53466     | 1.467279     | 0.000799    | 0.00587     |
| 2.216151    | 2.882604    | -1.587166    | 0.0105      | 0.033306    |
| 5.228543    | 6.639821    | -2.689682    | 0.001031667 | 0.005201    |
| 5.798356667 | 6.519685    | -1.650295333 | 0.002879    | 0.011393    |
| 2.016937    | 2.43564     | -1.336725    | 0.017863    | 0.048139    |
| 6.0623885   | 6.511844    | -1.365804    | 0.0189145   | 0.048139    |
| 3.069357    | 4.049862    | -1.9739915   | 0.004902    | 0.018727    |
| 8.3223204   | 8.7859568   | -1.3847798   | 0.0052782   | 0.0177766   |
| 2.854891    | 3.7032225   | -1.820799    | 0.002354    | 0.008674    |
| 5.834165    | 3.924458    | 3.757327     | 0.004035    | 0.015015    |
| 2.20819     | 2.656944    | -1.364861    | 0.003868    | 0.015015    |
| 4.289275    | 4.883237    | -1.509387    | 0.008682    | 0.022439    |
| 3.230387    | 2.111322    | 2.172061     | 0.014224    | 0.048139    |
| 6.9727465   | 6.4524835   | 1.4419545    | 0.004679    | 0.019588    |
| 9.396703    | 9.957014    | -1.474588    | 0.018854    | 0.048139    |
| 10.779119   | 10.390533   | 1.30911      | 0.018813    | 0.048139    |
| 5.457503    | 2.829727    | 6.180726     | 0.000044    | 0           |
| 6.576558667 | 7.255687333 | -1.610687333 | 0.003686333 | 0.014346333 |
| 8.190907667 | 7.264462333 | 1.905355     | 0.000345    | 0.002427333 |
| 11.462987   | 10.856445   | 1.522606     | 0.000041    | 0           |

|             |             |              |             |             |
|-------------|-------------|--------------|-------------|-------------|
| 7.794544    | 6.675725    | 2.171692     | 0.000033    | 0           |
| 7.966479    | 6.394563    | 2.972993     | 0.00122     | 0.00587     |
| 6.362808    | 7.406973    | -2.062173    | 0.000031    | 0           |
| 10.6854675  | 10.0829015  | 1.5189445    | 0.0005465   | 0.003863    |
| 10.574256   | 10.236116   | 1.264126     | 0.004405    | 0.022439    |
| 8.31928     | 7.025855    | 2.45419      | 0.000057    | 0           |
| 10.325955   | 9.958447    | 1.290123     | 0.000863    | 0.00587     |
| 6.1828045   | 8.3069455   | -4.359877    | 0.0000385   | 0           |
| 7.657534    | 6.403803    | 2.384572     | 0.000299    | 0.002333    |
| 8.550123667 | 7.859475333 | 1.614697333  | 0.000704667 | 0.004876333 |
| 6.2485065   | 5.5289125   | 1.6525025    | 0.0048245   | 0.019588    |
| 8.268269667 | 7.513462333 | 1.700203333  | 0.000757333 | 0.003040333 |
| 5.828711    | 7.491674    | -3.166661    | 0.005509    | 0.015015    |
| 4.482153    | 3.7755685   | 1.6417705    | 0.009451    | 0.025236    |
| 7.627111    | 8.163594    | -1.450433    | 0.007362    | 0.022439    |
| 5.207609333 | 5.788778667 | -1.502279333 | 0.012287    | 0.032153333 |
| 4.782498    | 5.272472    | -1.404419    | 0.011821    | 0.033306    |
| 6.097577    | 6.855924    | -1.697907    | 0.0017805   | 0.006492    |
| 5.943468429 | 6.716165    | -1.719227429 | 0.001316    | 0.005326857 |
| 4.065996667 | 4.690664333 | -1.548052667 | 0.001885333 | 0.007739333 |
| 5.839802    | 6.4454025   | -1.5473765   | 0.007996    | 0.025236    |
| 3.471895    | 4.253569    | -1.719123    | 0.003127    | 0.009121    |
| 4.046892    | 5.148382    | -2.145762    | 0.00043     | 0.002333    |
| 5.49867325  | 6.1138985   | -1.53660125  | 0.0019845   | 0.00727125  |
| 9.01059     | 8.528796    | 1.397544667  | 0.001290667 | 0.006284667 |
| 4.500682    | 4.968836    | -1.383338    | 0.005292    | 0.015015    |
| 5.56427     | 6.204367    | -1.558434    | 0.008517    | 0.022439    |
| 4.342214    | 3.435029    | 1.875384     | 0.017411    | 0.048139    |
| 3.9746665   | 3.4967415   | 1.4032535    | 0.011903    | 0.035289    |
| 9.806379    | 8.606893    | 2.296578     | 0.000028    | 0           |
| 3.7004635   | 4.368819    | -1.5892895   | 0.00526     | 0.018727    |
| 2.020202    | 2.378107    | -1.281564    | 0.018064    | 0.048139    |
| 5.0972395   | 3.045231    | 4.148508     | 0.0001035   | 0.000543    |
| 6.79478325  | 7.72294325  | -1.90987725  | 0.00218525  | 0.00928     |
| 6.387940333 | 5.774521333 | 1.532996667  | 0.001812667 | 0.007739333 |



|             |             |              |             |             |
|-------------|-------------|--------------|-------------|-------------|
| 6.1107805   | 5.5245625   | 1.501411     | 0.004636    | 0.018727    |
| 2.492857    | 3.170808    | -1.599866    | 0.001629    | 0.00587     |
| 2.215773    | 3.0358525   | -1.776656    | 0.00121     | 0.006492    |
| 9.420944    | 8.4217805   | 1.999185     | 0.0000835   | 0.000543    |
| 5.827066    | 6.34784     | -1.434725    | 0.021344    | 0.048139    |
| 4.738366    | 3.379567    | 2.564717     | 0.000378    | 0.002333    |
| 7.226331    | 6.615682    | 1.526947     | 0.003255    | 0.015015    |
| 4.113111    | 4.994596    | -1.8442185   | 0.001672    | 0.0074955   |
| 4.939335    | 6.2166365   | -2.4253705   | 0.0003705   | 0.0024745   |
| 8.258152    | 8.58594     | -1.255088    | 0.018062    | 0.048139    |
| 3.288507    | 4.821172    | -3.048794667 | 0.000069    | 0.000362    |
| 9.940813    | 9.462129    | 1.393472     | 0.001894    | 0.009121    |
| 7.0388135   | 6.142767    | 1.860989     | 0.001942    | 0.0075075   |
| 10.788959   | 10.449167   | 1.265573     | 0.011559    | 0.033306    |
| 4.743537    | 5.783826    | -2.05664     | 0.00221     | 0.009121    |
| 12.437019   | 11.753029   | 1.606577     | 0.000089    | 0           |
| 10.709516   | 10.233323   | 1.391068     | 0.000984    | 0.00587     |
| 12.421572   | 12.052309   | 1.291693     | 0.002181    | 0.009121    |
| 7.095838667 | 5.198543667 | 3.728049667  | 9.23333E-05 | 0.000362    |
| 6.325563    | 4.660639    | 3.179183     | 0.002458    | 0.012068    |
| 6.36281     | 6.007391    | 1.279357     | 0.012742    | 0.048139    |
| 12.109497   | 12.384655   | -1.210126    | 0.007275    | 0.022439    |
| 4.70137     | 5.242388333 | -1.460678333 | 0.005091    | 0.015525    |
| 7.2150966   | 7.7295924   | -1.4315086   | 0.0017054   | 0.0062184   |
| 7.737549    | 6.482853    | 2.386168     | 0.001979    | 0.009121    |
| 8.01737775  | 7.1421475   | 1.83979075   | 0.00656075  | 0.0188755   |
| 2.9815105   | 3.6431055   | -1.5996925   | 0.004014    | 0.012042    |
| 4.514152    | 4.94967     | -1.352396    | 0.015915    | 0.048139    |
| 2.219669    | 2.575832    | -1.280017    | 0.017231    | 0.048139    |
| 10.704069   | 10.02207633 | 1.628423     | 0.005384667 | 0.019359333 |
| 3.060742    | 2.228795    | 1.780087     | 0.021044    | 0.048139    |
| 7.058781    | 5.81991     | 2.360137     | 0.000437    | 0.002333    |
| 5.505647    | 4.9891695   | 1.4304705    | 0.009367    | 0.033306    |
| 7.092584333 | 8.2885055   | -2.295896333 | 0.000105333 | 0.000817167 |
| 4.333627    | 5.097543    | -1.698094    | 0.009343    | 0.033306    |

|             |             |             |             |             |
|-------------|-------------|-------------|-------------|-------------|
| 2.029486    | 2.342343    | -1.242165   | 0.003081    | 0.009121    |
| 11.049928   | 11.76827    | -1.64529    | 0.015884    | 0.048139    |
| 4.886955    | 3.121       | 3.400991    | 0.000098    | 0           |
| 4.707608    | 4.23946     | 1.387514    | 0.0148875   | 0.048139    |
| 10.252076   | 9.630593    | 1.538499    | 0.002001    | 0.009439    |
| 10.080541   | 9.406554    | 1.595476    | 0.020685    | 0.048139    |
| 7.203744    | 6.664134    | 1.45358     | 0.00951     | 0.033306    |
| 8.5418085   | 7.8609645   | 1.6041215   | 0.016863    | 0.048139    |
| 4.333227    | 5.084902    | -1.683746   | 0.005362    | 0.015015    |
| 4.540487    | 3.939443    | 1.516813    | 0.000596    | 0.003863    |
| 7.1948135   | 6.717035    | 1.392819    | 0.000067    | 0           |
| 7.599716    | 6.9294475   | 1.5990035   | 0.0084675   | 0.031577    |
| 4.790831    | 3.456063    | 2.52235     | 0.011928    | 0.033306    |
| 7.797681    | 6.902072    | 1.860395    | 0.00129     | 0.00587     |
| 3.625768    | 4.345018    | -1.646326   | 0.004054    | 0.015015    |
| 5.524162    | 5.8858305   | -1.2868405  | 0.005149    | 0.015015    |
| 5.196389    | 3.726212    | 2.7721825   | 0.0001485   | 0.0008225   |
| 4.858916    | 3.713621    | 2.211913    | 0.006686    | 0.022439    |
| 10.66512567 | 9.852031667 | 1.766827667 | 0.004210333 | 0.011102    |
| 5.129571    | 6.328246    | -2.295286   | 0.001197    | 0.00587     |
| 6.412487    | 5.183873    | 2.349119    | 0.0007535   | 0.0048665   |
| 7.164369    | 6.415565    | 1.680399    | 0.000304    | 0.002333    |
| 5.531777    | 4.775817    | 1.688755    | 0.006137    | 0.022439    |
| 4.628042    | 3.656225333 | 2.002914667 | 0.007157333 | 0.019086667 |
| 5.1773585   | 4.5048895   | 1.597329    | 0.005294    | 0.0241605   |
| 3.996514    | 5.334609    | -2.528172   | 0.000074    | 0           |
| 2.320187    | 2.9442965   | -1.5414915  | 0.0092565   | 0.0278725   |
| 2.654535    | 3.474277    | -1.7869495  | 0.000889    | 0.003863    |
| 6.587114    | 5.798427    | 1.727502    | 0.000476    | 0.003863    |
| 5.501375    | 4.705445    | 1.736196    | 0.013507    | 0.048139    |
| 2.614215    | 3.28578     | -1.5928     | 0.001957    | 0.009121    |
| 5.385163333 | 5.903584667 | -1.433011   | 0.00394     | 0.013050333 |
| 7.488236    | 4.899908    | 6.014013    | 0.000028    | 0           |
| 7.043347    | 4.659195    | 5.22037     | 0.000581    | 0.003863    |
| 7.989178    | 8.638363    | -1.568282   | 0.017801    | 0.048139    |

|             |             |              |             |             |
|-------------|-------------|--------------|-------------|-------------|
| 4.555698    | 5.5074      | -1.934154    | 0.000344    | 0.002333    |
| 5.6020265   | 6.260974    | -1.5832825   | 0.0008345   | 0.0041015   |
| 7.134929    | 7.707629    | -1.487304    | 0.000097    | 0.001086    |
| 4.613383667 | 4.161082667 | 1.376256     | 0.011790667 | 0.032153333 |
| 9.39602225  | 8.18165725  | 2.327165     | 0.000089    | 0.000543    |
| 6.8749355   | 6.0494775   | 1.7746155    | 0.0146705   | 0.048139    |
| 7.50917675  | 8.15900925  | -1.57148     | 0.00058225  | 0.0027335   |
| 4.593102    | 6.445743    | -3.611606    | 0.003257    | 0.015015    |
| 4.904381    | 5.993775    | -2.127847    | 0.002691    | 0.009121    |
| 7.775795    | 8.379036    | -1.519125    | 0.00045     | 0.002333    |
| 8.148414    | 7.313038    | 1.793998333  | 0.005283333 | 0.022981667 |
| 11.897073   | 11.600949   | 1.227841     | 0.018566    | 0.048139    |
| 8.5983445   | 7.873236    | 1.656988     | 0.0016975   | 0.009439    |
| 7.181318    | 7.706523    | -1.4404055   | 0.004658    | 0.012042    |
| 4.2677975   | 4.9013005   | -1.551542    | 0.009882    | 0.0278725   |
| 4.324620667 | 4.976919333 | -1.590607    | 0.007656333 | 0.022127    |
| 9.736943    | 10.112625   | -1.297453    | 0.007471    | 0.022439    |
| 4.1247805   | 4.7600925   | -1.553591    | 0.013951    | 0.0407225   |
| 3.0462945   | 3.8068655   | -1.694974    | 0.0056015   | 0.0212135   |
| 5.620284    | 5.0317125   | 1.507646     | 0.0046935   | 0.018727    |
| 2.726090333 | 4.109889    | -2.668744667 | 0.000938333 | 0.00418     |
| 6.8995612   | 7.5927098   | -1.6655846   | 0.0015084   | 0.0052938   |
| 5.265647    | 4.597451    | 1.589085     | 0.000668    | 0.003863    |
| 4.014168    | 4.7335485   | -1.667702    | 0.0002915   | 0.0011665   |
| 5.78845     | 3.640462    | 4.432094     | 0.000056    | 0           |
| 10.0408865  | 7.8333595   | 4.6547285    | 0.0000435   | 0           |
| 6.502213    | 7.140576    | -1.556562    | 0.01208     | 0.033306    |
| 6.174436    | 5.518932    | 1.575166     | 0.009902    | 0.033306    |
| 6.180526    | 5.507252    | 1.594688     | 0.001733    | 0.009121    |
| 5.450386    | 6.03551     | -1.500384    | 0.001176    | 0.00587     |
| 3.953702667 | 2.793919667 | 2.349840667  | 0.000708333 | 0.003588667 |
| 4.906943333 | 3.635550667 | 2.546086667  | 0.001270667 | 0.006961667 |
| 5.24482525  | 6.61447375  | -2.59292375  | 0.00152325  | 0.00643925  |
| 6.598694    | 6.880707    | -1.21589     | 0.019338    | 0.048139    |
| 5.7028675   | 6.5488415   | -1.7998025   | 0.005125    | 0.01578     |

|           |             |             |             |             |
|-----------|-------------|-------------|-------------|-------------|
| 3.8194    | 4.596255    | -1.7134055  | 0.003242    | 0.0117625   |
| 5.2532065 | 6.4702085   | -2.3961005  | 0.0009945   | 0.0048665   |
| 7.450609  | 8.90854     | -2.747792   | 0.0001925   | 0.0013655   |
| 8.22358   | 8.735686    | -1.426131   | 0.006663    | 0.022439    |
| 6.1888055 | 3.711378    | 5.576243    | 0.0000875   | 0           |
| 5.330672  | 4.611613    | 1.646109    | 0.016564    | 0.048139    |
| 4.9807135 | 5.7853505   | -1.7504155  | 0.000278    | 0.001989    |
| 6.822576  | 5.629944    | 2.285693    | 0.007623    | 0.033306    |
| 3.158854  | 2.831685    | 1.254549    | 0.002668    | 0.015015    |
| 2.62714   | 3.115017    | -1.40238    | 0.003492    | 0.015015    |
| 5.668615  | 2.824268    | 7.181808    | 0.000118    | 0.001086    |
| 2.756689  | 3.323303    | -1.481043   | 0.014167    | 0.033306    |
| 2.602783  | 3.013553    | -1.329395   | 0.012087    | 0.033306    |
| 10.377833 | 9.914026    | 1.379177    | 0.010667    | 0.033306    |
| 2.154238  | 2.890823    | -1.666227   | 0.003193    | 0.015015    |
| 4.0637825 | 4.929198    | -1.8557905  | 0.0022635   | 0.008674    |
| 5.146274  | 5.75118     | -1.52088    | 0.001786    | 0.009121    |
| 3.207507  | 3.746733    | -1.455163   | 0.008461    | 0.0241605   |
| 7.422454  | 9.320486    | -3.727042   | 0.000102    | 0.001086    |
| 11.264362 | 10.976823   | 1.220557    | 0.012135    | 0.033306    |
| 5.253499  | 4.868064    | 1.306253    | 0.014499    | 0.048139    |
| 11.079072 | 10.759639   | 1.24784     | 0.020172    | 0.048139    |
| 9.686959  | 7.785289    | 3.736455    | 0.000031    | 0           |
| 8.073372  | 8.54165     | -1.383457   | 0.013464    | 0.033306    |
| 6.059191  | 5.373928667 | 1.618335333 | 0.003182    | 0.012476667 |
| 6.591332  | 5.556018667 | 2.123068    | 0.001589667 | 0.006961667 |
| 7.395676  | 6.78418     | 1.527842    | 0.00169     | 0.009121    |
| 4.766806  | 3.990567    | 1.7857065   | 0.0022775   | 0.0104425   |
| 4.406304  | 2.795999    | 3.053164    | 0.000907    | 0.00587     |
| 7.981565  | 7.422198    | 1.473622    | 0.011644    | 0.033306    |
| 6.578112  | 5.976142    | 1.517787    | 0.001017    | 0.00587     |
| 10.614525 | 10.310459   | 1.23462     | 0.020631    | 0.048139    |
| 8.576681  | 7.90478     | 1.59317     | 0.011195    | 0.033306    |
| 4.238537  | 3.511842    | 1.654844    | 0.0141      | 0.048139    |
| 3.1834355 | 3.8298465   | -1.566783   | 0.0097645   | 0.0270045   |

|             |             |              |             |             |
|-------------|-------------|--------------|-------------|-------------|
| 7.755189    | 7.219246333 | 1.450292333  | 0.005012333 | 0.019359333 |
| 6.8691695   | 6.368291    | 1.416294     | 0.0001335   | 0.0008225   |
| 6.283529    | 6.637105    | -1.277724    | 0.016403    | 0.048139    |
| 6.837646    | 7.372669    | -1.448965    | 0.019641    | 0.048139    |
| 7.304943    | 6.8532925   | 1.3715665    | 0.0008845   | 0.005383    |
| 5.250911    | 5.710809    | -1.375445    | 0.003989    | 0.015015    |
| 3.853249    | 4.595769    | -1.680005333 | 0.002075333 | 0.010002    |
| 6.148844    | 5.883217    | 1.202159     | 0.005218    | 0.022439    |
| 6.044617    | 4.524621    | 2.867902     | 0.000847    | 0.00587     |
| 10.922675   | 9.998103    | 1.89812      | 0.005628    | 0.022439    |
| 7.2348698   | 7.8082206   | -1.4950592   | 0.003145    | 0.0116058   |
| 7.63058     | 6.159975    | 2.771382     | 0.000525    | 0.003863    |
| 8.3785935   | 7.3438495   | 2.050395     | 0.0016695   | 0.0075075   |
| 8.158274    | 8.985165    | -1.773859    | 0.000036    | 0           |
| 5.996015    | 5.5527705   | 1.3599585    | 0.003066    | 0.0141545   |
| 3.5361815   | 4.374742    | -1.816624    | 0.0045855   | 0.0141545   |
| 3.5266725   | 4.2933195   | -1.71777475  | 0.01003675  | 0.027008    |
| 8.033029    | 7.343521    | 1.612733     | 0.000201    | 0.001645    |
| 3.253032    | 2.639384    | 1.530123     | 0.003355    | 0.015015    |
| 5.1391555   | 3.76904875  | 2.62177025   | 0.0019915   | 0.00757     |
| 3.428474    | 7.751925    | -20.021129   | 0.000024    | 0           |
| 8.013626    | 7.394339    | 1.536116     | 0.010983    | 0.033306    |
| 8.453416    | 7.065246    | 2.617464     | 0.000227    | 0.001645    |
| 6.724539    | 7.219936    | -1.409709    | 0.005464    | 0.015015    |
| 4.8453335   | 5.517533    | -1.6033835   | 0.001021    | 0.0045605   |
| 3.746984    | 5.01831     | -2.413833    | 0.003186    | 0.015015    |
| 5.156238    | 6.147773    | -1.9883      | 0.00869     | 0.022439    |
| 5.60122     | 5.211165    | 1.310443     | 0.017598    | 0.048139    |
| 10.681711   | 10.315392   | 1.28906      | 0.005563    | 0.022439    |
| 2.802473    | 3.863104    | -2.085843    | 0.000454    | 0.002333    |
| 2.409105    | 3.169124    | -1.693513    | 0.00809     | 0.022439    |
| 10.85992    | 10.4280095  | 1.3490725    | 0.0000275   | 0           |
| 7.713943667 | 6.580064667 | 2.195015     | 0.001634333 | 0.008918333 |
| 5.140053    | 4.863634    | 1.211185     | 0.005382    | 0.022439    |
| 9.121762833 | 8.187036333 | 1.917084167  | 4.71667E-05 | 0.000181    |

|             |             |              |             |             |
|-------------|-------------|--------------|-------------|-------------|
| 8.344461    | 6.798798333 | 2.977720333  | 0.001699    | 0.007479667 |
| 2.937849    | 3.937546    | -1.999579    | 0.000554    | 0.003863    |
| 7.635568    | 4.976766    | 6.315083     | 0.000026    | 0           |
| 7.305896    | 6.5039575   | 1.7451515    | 0.0003825   | 0.0019315   |
| 3.213207    | 4.06377     | -1.803204    | 0.004417    | 0.015015    |
| 3.8639885   | 4.3962715   | -1.4489695   | 0.000304    | 0.001989    |
| 4.477761    | 5.2761925   | -1.7491795   | 0.002346    | 0.0075075   |
| 7.1477665   | 7.851458    | -1.6297745   | 0.0006485   | 0.002935    |
| 10.776129   | 10.45404    | 1.25014      | 0.02067     | 0.048139    |
| 6.186293    | 5.23634     | 1.93181      | 0.013506    | 0.048139    |
| 12.404373   | 11.451002   | 1.936392     | 0.000027    | 0           |
| 9.343582    | 6.4246205   | 7.5652545    | 0.000058    | 0           |
| 8.357829    | 7.951347667 | 1.325869333  | 0.007079333 | 0.026566333 |
| 6.534036    | 5.103825    | 2.694862     | 0.000705    | 0.003863    |
| 4.852501    | 2.3129525   | 5.8776185    | 0.0019455   | 0.009121    |
| 3.600975    | 4.456404333 | -1.835703    | 0.001013667 | 0.003402333 |
| 2.294809    | 2.688128    | -1.313412    | 0.019204    | 0.048139    |
| 4.361126    | 4.805171    | -1.360414    | 0.000765    | 0.003863    |
| 9.030713    | 9.513761    | -1.397694    | 0.006014    | 0.022439    |
| 5.9913776   | 6.7208972   | -1.6705164   | 0.0061096   | 0.0183578   |
| 9.452344333 | 10.08561433 | -1.559201333 | 0.000182333 | 0.000777667 |
| 8.0982895   | 7.305102    | 1.734371     | 0.0014415   | 0.006492    |
| 7.828392333 | 7.065204667 | 1.699221     | 0.006481333 | 0.018780667 |
| 5.2811925   | 5.661351    | -1.301771    | 0.007231    | 0.0185845   |
| 7.153747    | 6.697289    | 1.372169     | 0.008797    | 0.033306    |
| 6.426117    | 5.645502    | 1.717864     | 0.008163    | 0.033306    |
| 3.265568    | 3.979262    | -1.639999    | 0.002113    | 0.009121    |
| 8.8677015   | 9.4814395   | -1.5314395   | 0.002384    | 0.009439    |
| 6.776556    | 5.569448    | 2.308743     | 0.000074    | 0           |
| 7.653077333 | 8.077909333 | -1.342769    | 0.012590333 | 0.032153333 |
| 5.209184    | 3.969683333 | 2.421580167  | 0.001109667 | 0.005766    |
| 4.301243    | 4.794924    | -1.408034    | 0.016385    | 0.048139    |
| 6.431935    | 7.124517    | -1.616173    | 0.010736    | 0.033306    |
| 5.257404    | 4.933101    | 1.252059     | 0.004718    | 0.022439    |
| 4.7112635   | 5.6448245   | -1.9417625   | 0.001425    | 0.0045605   |

|             |             |              |             |           |
|-------------|-------------|--------------|-------------|-----------|
| 4.955067    | 2.5976      | 5.1247       | 0.003067    | 0.015015  |
| 7.995275    | 7.451398    | 1.457885     | 0.000094    | 0         |
| 3.6731695   | 4.702926    | -2.068151    | 0.0023795   | 0.009439  |
| 4.747537    | 3.641276    | 2.15287      | 0.001941    | 0.009121  |
| 7.8350515   | 7.4355195   | 1.319102     | 0.003037    | 0.0112195 |
| 6.370308    | 6.801892    | -1.348714    | 0.011123    | 0.033306  |
| 2.909232    | 3.407512    | -1.412529    | 0.010953    | 0.033306  |
| 4.584351    | 5.228728    | -1.563065    | 0.01755     | 0.048139  |
| 2.302693    | 3.047153    | -1.675347    | 0.00178     | 0.009121  |
| 2.995521    | 3.7433885   | -1.7036055   | 0.002235    | 0.0074955 |
| 2.019642    | 2.431927    | -1.330792    | 0.000424    | 0.002333  |
| 4.175933    | 5.342595    | -2.244917    | 0.001116    | 0.00587   |
| 3.885531    | 4.551281    | -1.586394    | 0.009012    | 0.0278725 |
| 2.476713    | 2.964179    | -1.40198     | 0.015402    | 0.048139  |
| 3.788312    | 4.583574    | -1.7408485   | 0.0082695   | 0.0241605 |
| 5.4201705   | 6.416366    | -1.994776    | 0.0002665   | 0.0011665 |
| 4.119905    | 4.813881    | -1.617736    | 0.003025    | 0.009121  |
| 4.776378    | 4.275657    | 1.41492      | 0.001954    | 0.009121  |
| 2.569772    | 3.590932    | -2.02955     | 0.001487    | 0.00587   |
| 5.421013667 | 6.481393667 | -2.134163667 | 0.001072333 | 0.005201  |
| 2.649193    | 2           | 1.568291     | 0.011692    | 0.033306  |
| 3.26922     | 4.023962    | -1.68733     | 0.008183    | 0.022439  |
| 3.0273035   | 3.9104425   | -1.8446705   | 0.0005655   | 0.003098  |
| 6.33797     | 5.387747    | 1.932171     | 0.002413    | 0.009121  |
| 4.602778    | 5.031083    | -1.345652    | 0.012535    | 0.033306  |
| 2.787349    | 3.45605     | -1.589642    | 0.018496    | 0.048139  |
| 2.262811    | 2.957238    | -1.618241    | 0.00069     | 0.003863  |
| 2.061435    | 2.415827    | -1.278446    | 0.015834    | 0.048139  |
| 5.4831675   | 6.249728    | -1.7077445   | 0.004666    | 0.013151  |
| 5.538122    | 6.133551    | -1.510922    | 0.015296    | 0.048139  |
| 2.584345    | 3.069548    | -1.399783    | 0.012879    | 0.033306  |
| 5.23705     | 5.824829    | -1.502932    | 0.009049    | 0.022439  |
| 6.471864    | 6.097503    | 1.296265     | 0.006283    | 0.022439  |
| 3.96635     | 4.587601    | -1.538208    | 0.000461    | 0.002333  |
| 2.895406    | 3.576054    | -1.60286     | 0.000714    | 0.003863  |

|           |           |            |           |           |
|-----------|-----------|------------|-----------|-----------|
| 7.371868  | 7.937666  | -1.4802695 | 0.0011315 | 0.005383  |
| 3.201984  | 3.590411  | -1.308966  | 0.006277  | 0.022439  |
| 2.141177  | 2.792461  | -1.570565  | 0.009083  | 0.033306  |
| 2.782083  | 5.145718  | -5.146654  | 0.000041  | 0         |
| 4.1805915 | 4.6832775 | -1.4220765 | 0.010219  | 0.0270045 |
