# Supplementary material for: Long noncoding RNA GSEC promotes neutrophil inflammatory activation by supporting PFKFB3-involved glycolytic metabolism in sepsis
Source: PubMed Central journal article supplement (PMC8671582; doi:10.1038/s41419-021-04428-7), 2021-12-14
Supplement: 41419_2021_4428_MOESM5_ESM.pdf [file 41419_2021_4428_MOESM5_ESM.pdf]

**Supplementary Table 3. 11 co-expressed lncRNAs.**

| <b>Gene Symbol</b> | <b>Biotype</b> | <b>style</b> | <b>Degree</b> |
|--------------------|----------------|--------------|---------------|
| NONHSAT160878.1    | lncRNA         | up           | 47            |
| XR_926068.1        | lncRNA         | up           | 31            |
| NONHSAT010176.2    | lncRNA         | up           | 30            |
| XR_941546.1        | lncRNA         | up           | 24            |
| ENST00000629441.1  | lncRNA         | up           | 10            |
| NONHSAT081776.2    | lncRNA         | up           | 6             |
| NONHSAT181667.1    | lncRNA         | up           | 5             |
| NONHSAT131038.2    | lncRNA         | down         | 7             |
| ENST00000608064.1  | lncRNA         | down         | 4             |
| NONHSAT009146.2    | lncRNA         | down         | 1             |
| NR_003945.1        | lncRNA         | down         | 1             |
