# Supplementary material for: Long noncoding RNA GSEC promotes neutrophil inflammatory activation by supporting PFKFB3-involved glycolytic metabolism in sepsis
Source: PubMed Central journal article supplement (PMC8671582; doi:10.1038/s41419-021-04428-7), 2021-12-14
Supplement: 41419_2021_4428_MOESM6_ESM.pdf [file 41419_2021_4428_MOESM6_ESM.pdf]

**Supplementary Table 4. 105 co-expressed mRNAs.**

| Gene Symbol  | Biotype | Style | Degree |
|--------------|---------|-------|--------|
| ACER3        | mRNA    | up    | 10     |
| ACVR1B       | mRNA    | up    | 6      |
| ADAM9        | mRNA    | up    | 5      |
| ADGRG3       | mRNA    | up    | 2      |
| AGFG1        | mRNA    | up    | 15     |
| AKIRIN2      | mRNA    | up    | 1      |
| ALPL         | mRNA    | up    | 3      |
| ANXA3        | mRNA    | up    | 8      |
| ASPH         | mRNA    | up    | 5      |
| ATP11B       | mRNA    | up    | 11     |
| ATP6V1C1     | mRNA    | up    | 6      |
| ATP9A        | mRNA    | up    | 2      |
| BCLAF1       | mRNA    | down  | 2      |
| BUB3         | mRNA    | down  | 1      |
| CAB39        | mRNA    | up    | 1      |
| CARD6        | mRNA    | up    | 22     |
| CCDC71L      | mRNA    | up    | 1      |
| CD177        | mRNA    | up    | 13     |
| CDC42EP3     | mRNA    | up    | 11     |
| CDK5RAP2     | mRNA    | up    | 3      |
| CR1          | mRNA    | up    | 6      |
| CST7         | mRNA    | up    | 1      |
| CYLD         | mRNA    | down  | 2      |
| CYP1B1       | mRNA    | up    | 2      |
| CYSTM1       | mRNA    | up    | 6      |
| DACH1        | mRNA    | up    | 6      |
| DDAH2        | mRNA    | up    | 7      |
| DOK3         | mRNA    | up    | 1      |
| DYSF         | mRNA    | up    | 5      |
| ECHDC3       | mRNA    | up    | 2      |
| EMILIN2      | mRNA    | up    | 9      |
| ETS2         | mRNA    | up    | 9      |
| EXOC6        | mRNA    | up    | 9      |
| EXOSC4       | mRNA    | up    | 4      |
| F5           | mRNA    | up    | 1      |
| FCAR         | mRNA    | up    | 1      |
| FCER1G       | mRNA    | up    | 19     |
| FKBP5        | mRNA    | up    | 5      |
| FLOT2        | mRNA    | up    | 2      |
| GALNT14      | mRNA    | up    | 3      |
| GAS7         | mRNA    | up    | 9      |
| GPR84        | mRNA    | up    | 10     |
| GRB10        | mRNA    | up    | 7      |
| GYG1         | mRNA    | up    | 30     |
| IER3         | mRNA    | up    | 1      |
| IL18R1       | mRNA    | up    | 4      |
| IRAK3        | mRNA    | up    | 19     |
| KIAA0930     | mRNA    | up    | 4      |
| KIF1B        | mRNA    | up    | 10     |
| LILRA5       | mRNA    | up    | 1      |
| LOC100507507 | mRNA    | up    | 2      |
| LRG1         | mRNA    | up    | 1      |
| LRPAP1       | mRNA    | up    | 1      |
| MAP2K6       | mRNA    | up    | 6      |
| MAPK14       | mRNA    | up    | 25     |
| MCEMP1       | mRNA    | up    | 24     |

|          |      |      |    |
|----------|------|------|----|
| METTL9   | mRNA | up   | 3  |
| NAIP     | mRNA | up   | 8  |
| NLRC4    | mRNA | up   | 13 |
| OPLAH    | mRNA | up   | 1  |
| P2RY10   | mRNA | down | 2  |
| PDCD4    | mRNA | down | 3  |
| PDGFC    | mRNA | up   | 1  |
| PECR     | mRNA | up   | 1  |
| PFKFB3   | mRNA | up   | 3  |
| PGD      | mRNA | up   | 2  |
| PGK1     | mRNA | up   | 2  |
| PGS1     | mRNA | up   | 11 |
| POR      | mRNA | up   | 5  |
| PPP2R5C  | mRNA | down | 1  |
| PPTC7    | mRNA | down | 1  |
| PRKAA1   | mRNA | up   | 1  |
| PUM2     | mRNA | down | 1  |
| PYGL     | mRNA | up   | 13 |
| RAB20    | mRNA | up   | 2  |
| RAB27A   | mRNA | up   | 2  |
| RAB32    | mRNA | up   | 7  |
| RALGAPA2 | mRNA | up   | 1  |
| RANBP9   | mRNA | up   | 1  |
| RBMS1    | mRNA | up   | 4  |
| RNASEH2B | mRNA | down | 1  |
| S100A9   | mRNA | up   | 1  |
| SDHC     | mRNA | up   | 1  |
| SERPINB1 | mRNA | up   | 5  |
| SET      | mRNA | down | 1  |
| SH3GLB1  | mRNA | up   | 6  |
| SIPA1L2  | mRNA | up   | 1  |
| SLC22A4  | mRNA | up   | 2  |
| SLC25A40 | mRNA | up   | 1  |
| SLC26A8  | mRNA | up   | 2  |
| SRPK1    | mRNA | up   | 1  |
| STOM     | mRNA | up   | 5  |
| TBC1D8   | mRNA | up   | 10 |
| TDRD9    | mRNA | up   | 12 |
| TLR5     | mRNA | up   | 12 |
| TMCO3    | mRNA | up   | 1  |
| TSPO     | mRNA | up   | 7  |
| UPP1     | mRNA | up   | 21 |
| USB1     | mRNA | up   | 1  |
| VNN1     | mRNA | up   | 2  |
| ZCCHC7   | mRNA | down | 1  |
| ZDHHC19  | mRNA | up   | 1  |
| ZDHHC3   | mRNA | up   | 4  |
| ZEB1     | mRNA | down | 1  |
| ZNF438   | mRNA | up   | 7  |
