# Supplementary material for: Long noncoding RNA GSEC promotes neutrophil inflammatory activation by supporting PFKFB3-involved glycolytic metabolism in sepsis
Source: PubMed Central journal article supplement (PMC8671582; doi:10.1038/s41419-021-04428-7), 2021-12-14
Supplement: 41419_2021_4428_MOESM7_ESM.pdf [file 41419_2021_4428_MOESM7_ESM.pdf]

**Supplementary Table 5. 35 upregulated biological processes of the 105 co-expressed mRNAs.**

| go_id      | go_name                                                          | Style | go_diffgene_count | pvalue     | FDR        | -lg(P)      |
|------------|------------------------------------------------------------------|-------|-------------------|------------|------------|-------------|
| GO:0045087 | innate immune response                                           | Up    | 11                | 4.7656E-09 | 2.4829E-06 | 8.321884792 |
| GO:0006006 | glucose metabolic process                                        | Up    | 6                 | 6.7964E-08 | 1.7705E-05 | 7.167718812 |
| GO:0042742 | defense response to bacterium                                    | Up    | 5                 | 2.403E-06  | 0.00034473 | 5.6192427   |
| GO:0055114 | oxidation-reduction process                                      | Up    | 5                 | 2.6467E-06 | 0.00034473 | 5.577296208 |
| GO:0019395 | fatty acid oxidation                                             | Up    | 3                 | 5.2229E-06 | 0.00054423 | 5.282086655 |
| GO:0002755 | MyD88-dependent toll-like receptor signaling pathway             | Up    | 4                 | 3.3169E-05 | 0.0027073  | 4.479267034 |
| GO:0044281 | small molecule metabolic process                                 | Up    | 11                | 3.6374E-05 | 0.0027073  | 4.43920398  |
| GO:0043066 | negative regulation of apoptotic process                         | Up    | 7                 | 4.508E-05  | 0.00270972 | 4.34601368  |
| GO:0005975 | carbohydrate metabolic process                                   | Up    | 6                 | 5.5643E-05 | 0.00270972 | 4.254586707 |
| GO:0009437 | carnitine metabolic process                                      | Up    | 2                 | 5.7211E-05 | 0.00270972 | 4.242519902 |
| GO:0046545 | development of primary female sexual characteristics             | Up    | 2                 | 5.7211E-05 | 0.00270972 | 4.242519902 |
| GO:0045542 | positive regulation of cholesterol biosynthetic process          | Up    | 2                 | 9.5255E-05 | 0.00413566 | 4.02111151  |
| GO:0032496 | response to lipopolysaccharide                                   | Up    | 4                 | 0.00012793 | 0.00512687 | 3.893042455 |
| GO:0010042 | response to manganese ion                                        | Up    | 2                 | 0.00014274 | 0.00531189 | 3.845460559 |
| GO:0007050 | cell cycle arrest                                                | Up    | 4                 | 0.00020115 | 0.00698662 | 3.696479546 |
| GO:0006915 | apoptotic process                                                | Up    | 7                 | 0.00030304 | 0.00986789 | 3.51849337  |
| GO:0002544 | chronic inflammatory response                                    | Up    | 2                 | 0.00034153 | 0.01022827 | 3.466569936 |
| GO:0008286 | insulin receptor signaling pathway                               | Up    | 4                 | 0.00035338 | 0.01022827 | 3.45176303  |
| GO:0006954 | inflammatory response                                            | Up    | 5                 | 0.00041016 | 0.01124688 | 3.38705193  |
| GO:0034166 | toll-like receptor 10 signaling pathway                          | Up    | 3                 | 0.00059177 | 0.01468161 | 3.227844676 |
| GO:0034146 | toll-like receptor 5 signaling pathway                           | Up    | 3                 | 0.00059177 | 0.01468161 | 3.227844676 |
| GO:0007165 | signal transduction                                              | Up    | 8                 | 0.00084029 | 0.01864642 | 3.075569325 |
| GO:0042149 | cellular response to glucose starvation                          | Up    | 2                 | 0.00085895 | 0.01864642 | 3.066031068 |
| GO:0045332 | phospholipid translocation                                       | Up    | 2                 | 0.00085895 | 0.01864642 | 3.066031068 |
| GO:0043065 | positive regulation of apoptotic process                         | Up    | 4                 | 0.0010576  | 0.02204035 | 2.975679321 |
| GO:0005980 | glycogen catabolic process                                       | Up    | 2                 | 0.00143833 | 0.02882201 | 2.842140138 |
| GO:0045648 | positive regulation of erythrocyte differentiation               | Up    | 2                 | 0.00160592 | 0.03098838 | 2.794275109 |
| GO:0000187 | activation of MAPK activity                                      | Up    | 3                 | 0.00181311 | 0.03373673 | 2.741576657 |
| GO:0008284 | positive regulation of cell proliferation                        | Up    | 5                 | 0.0018878  | 0.03391527 | 2.724044469 |
| GO:0051092 | positive regulation of NF-kappaB transcription factor activity   | Up    | 3                 | 0.0027071  | 0.04549673 | 2.56749588  |
| GO:0002224 | toll-like receptor signaling pathway                             | Up    | 3                 | 0.0027071  | 0.04549673 | 2.56749588  |
| GO:0048010 | vascular endothelial growth factor receptor signaling pathway    | Up    | 2                 | 0.00280036 | 0.04559329 | 2.552786806 |
| GO:0051149 | positive regulation of muscle cell differentiation               | Up    | 2                 | 0.00326979 | 0.0489271  | 2.485479486 |
| GO:2000379 | positive regulation of reactive oxygen species metabolic process | Up    | 2                 | 0.00326979 | 0.0489271  | 2.485479486 |
| GO:0007596 | blood coagulation                                                | Up    | 5                 | 0.00328685 | 0.0489271  | 2.483220186 |
