# Supplementary material for: Long noncoding RNA GSEC promotes neutrophil inflammatory activation by supporting PFKFB3-involved glycolytic metabolism in sepsis
Source: PubMed Central journal article supplement (PMC8671582; doi:10.1038/s41419-021-04428-7), 2021-12-14
Supplement: 41419_2021_4428_MOESM8_ESM.pdf [file 41419_2021_4428_MOESM8_ESM.pdf]

**Supplementary Table 6. 19 downregulated biological processes of the 105 co-expressed mRNAs.**

| go_id      | go_name                                                         | Style | go_diffgene_count | pvalue     | FDR        | -lg(P)     |
|------------|-----------------------------------------------------------------|-------|-------------------|------------|------------|------------|
| GO:0045892 | negative regulation of transcription, DNA-dependent             | Down  | 4                 | 5.7459E-06 | 0.00045393 | 5.24063849 |
| GO:2000144 | positive regulation of DNA-dependent transcription, initiation  | Down  | 1                 | 0.00080201 | 0.02111947 | 3.09582292 |
| GO:0010464 | regulation of mesenchymal cell proliferation                    | Down  | 1                 | 0.00080201 | 0.02111947 | 3.09582292 |
| GO:0006917 | induction of apoptosis                                          | Down  | 2                 | 0.00237972 | 0.03166174 | 2.62347447 |
| GO:0071173 | spindle assembly checkpoint                                     | Down  | 1                 | 0.00240557 | 0.03166174 | 2.61878149 |
| GO:0051983 | regulation of chromosome segregation                            | Down  | 1                 | 0.00400855 | 0.03166174 | 2.39701256 |
| GO:0043620 | regulation of DNA-dependent transcription in response to stress | Down  | 1                 | 0.00400855 | 0.03166174 | 2.39701256 |
| GO:0033081 | regulation of T cell differentiation in thymus                  | Down  | 1                 | 0.00400855 | 0.03166174 | 2.39701256 |
| GO:0051150 | regulation of smooth muscle cell differentiation                | Down  | 1                 | 0.00480982 | 0.03166174 | 2.31787122 |
| GO:0016070 | RNA metabolic process                                           | Down  | 2                 | 0.00485924 | 0.03166174 | 2.31343137 |
| GO:0008608 | attachment of spindle microtubules to kinetochore               | Down  | 1                 | 0.00561094 | 0.03166174 | 2.25096434 |
| GO:0030857 | negative regulation of epithelial cell differentiation          | Down  | 1                 | 0.00561094 | 0.03166174 | 2.25096434 |
| GO:0042347 | negative regulation of NF-kappaB import into nucleus            | Down  | 1                 | 0.00561094 | 0.03166174 | 2.25096434 |
| GO:2001022 | positive regulation of response to DNA damage stimulus          | Down  | 1                 | 0.00561094 | 0.03166174 | 2.25096434 |
| GO:0070507 | regulation of microtubule cytoskeleton organization             | Down  | 1                 | 0.00641191 | 0.03351803 | 2.1930123  |
| GO:0035067 | negative regulation of histone acetylation                      | Down  | 1                 | 0.00721274 | 0.03351803 | 2.14189969 |
| GO:0034063 | stress granule assembly                                         | Down  | 1                 | 0.00721274 | 0.03351803 | 2.14189969 |
| GO:0008283 | negative regulation of cell proliferation                       | Down  | 2                 | 0.00905348 | 0.0397347  | 2.04318467 |
| GO:0043508 | negative regulation of JUN kinase activity                      | Down  | 1                 | 0.00961434 | 0.0399754  | 2.01708067 |
