# Supplementary material for: Long noncoding RNA GSEC promotes neutrophil inflammatory activation by supporting PFKFB3-involved glycolytic metabolism in sepsis
Source: PubMed Central journal article supplement (PMC8671582; doi:10.1038/s41419-021-04428-7), 2021-12-14
Supplement: 41419_2021_4428_MOESM9_ESM.pdf [file 41419_2021_4428_MOESM9_ESM.pdf]

**Supplementary Table 7. 11 immune response related upregulated biological processes.**

| go_id      | go_number | go_name                                              | enrichment  | pvalue      | FDR         | gene_id | gene_name | gene_number |
|------------|-----------|------------------------------------------------------|-------------|-------------|-------------|---------|-----------|-------------|
| GO:0000187 | 1         | activation of MAPK activity                          | 20.32258065 | 0.001813107 | 0.033736734 | 5608    | MAP2K6    | 8           |
| GO:0000187 | 1         | activation of MAPK activity                          | 20.32258065 | 0.001813107 | 0.033736734 | 1432    | MAPK14    | 9           |
| GO:0000187 | 1         | activation of MAPK activity                          | 20.32258065 | 0.001813107 | 0.033736734 | 5562    | PRKAA1    | 12          |
| GO:0002224 | 2         | toll-like receptor signaling pathway                 | 17.71234093 | 0.002707099 | 0.045496726 | 5608    | MAP2K6    | 8           |
| GO:0002224 | 2         | toll-like receptor signaling pathway                 | 17.71234093 | 0.002707099 | 0.045496726 | 1432    | MAPK14    | 9           |
| GO:0002224 | 2         | toll-like receptor signaling pathway                 | 17.71234093 | 0.002707099 | 0.045496726 | 7100    | TLR5      | 15          |
| GO:0002544 | 3         | chronic inflammatory response                        | 143.0107527 | 0.000341531 | 0.01022827  | 6280    | S100A9    | 13          |
| GO:0002544 | 3         | chronic inflammatory response                        | 143.0107527 | 0.000341531 | 0.01022827  | 8876    | VNN1      | 16          |
| GO:0002755 | 4         | MyD88-dependent toll-like receptor signaling pathway | 31.78016726 | 3.3169E-05  | 0.002707296 | 11213   | IRAK3     | 6           |
| GO:0002755 | 4         | MyD88-dependent toll-like receptor signaling pathway | 31.78016726 | 3.3169E-05  | 0.002707296 | 5608    | MAP2K6    | 8           |
| GO:0002755 | 4         | MyD88-dependent toll-like receptor signaling pathway | 31.78016726 | 3.3169E-05  | 0.002707296 | 1432    | MAPK14    | 9           |
| GO:0002755 | 4         | MyD88-dependent toll-like receptor signaling pathway | 31.78016726 | 3.3169E-05  | 0.002707296 | 7100    | TLR5      | 15          |
| GO:0006954 | 5         | inflammatory response                                | 10.90759978 | 0.000410155 | 0.011246883 | 4671    | NAIP      | 10          |
| GO:0006954 | 5         | inflammatory response                                | 10.90759978 | 0.000410155 | 0.011246883 | 58484   | NLRC4     | 11          |
| GO:0006954 | 5         | inflammatory response                                | 10.90759978 | 0.000410155 | 0.011246883 | 6280    | S100A9    | 13          |
| GO:0006954 | 5         | inflammatory response                                | 10.90759978 | 0.000410155 | 0.011246883 | 7100    | TLR5      | 15          |
| GO:0006954 | 5         | inflammatory response                                | 10.90759978 | 0.000410155 | 0.011246883 | 8876    | VNN1      | 16          |
| GO:0032496 | 6         | response to lipopolysaccharide                       | 22.58064516 | 0.000127926 | 0.005126865 | 55122   | AKIRIN2   | 1           |
| GO:0032496 | 6         | response to lipopolysaccharide                       | 22.58064516 | 0.000127926 | 0.005126865 | 249     | ALPL      | 2           |
| GO:0032496 | 6         | response to lipopolysaccharide                       | 22.58064516 | 0.000127926 | 0.005126865 | 11213   | IRAK3     | 6           |
| GO:0032496 | 6         | response to lipopolysaccharide                       | 22.58064516 | 0.000127926 | 0.005126865 | 6280    | S100A9    | 13          |
| GO:0034146 | 7         | toll-like receptor 5 signaling pathway               | 29.70223325 | 0.000591773 | 0.014681612 | 5608    | MAP2K6    | 8           |
| GO:0034146 | 7         | toll-like receptor 5 signaling pathway               | 29.70223325 | 0.000591773 | 0.014681612 | 1432    | MAPK14    | 9           |
| GO:0034146 | 7         | toll-like receptor 5 signaling pathway               | 29.70223325 | 0.000591773 | 0.014681612 | 7100    | TLR5      | 15          |
| GO:0034166 | 8         | toll-like receptor 10 signaling pathway              | 29.70223325 | 0.000591773 | 0.014681612 | 5608    | MAP2K6    | 8           |
| GO:0034166 | 8         | toll-like receptor 10 signaling pathway              | 29.70223325 | 0.000591773 | 0.014681612 | 1432    | MAPK14    | 9           |
| GO:0034166 | 8         | toll-like receptor 10 signaling pathway              | 29.70223325 | 0.000591773 | 0.014681612 | 7100    | TLR5      | 15          |
| GO:0042742 | 9         | defense response to bacterium                        | 31.54648956 | 2.40302E-06 | 0.000344732 | 306     | ANXA3     | 3           |
| GO:0042742 | 9         | defense response to bacterium                        | 31.54648956 | 2.40302E-06 | 0.000344732 | 2207    | FCER1G    | 5           |
| GO:0042742 | 9         | defense response to bacterium                        | 31.54648956 | 2.40302E-06 | 0.000344732 | 58484   | NLRC4     | 11          |
| GO:0042742 | 9         | defense response to bacterium                        | 31.54648956 | 2.40302E-06 | 0.000344732 | 6280    | S100A9    | 13          |
| GO:0042742 | 9         | defense response to bacterium                        | 31.54648956 | 2.40302E-06 | 0.000344732 | 7100    | TLR5      | 15          |
| GO:0045087 | 10        | innate immune response                               | 12.77803657 | 4.76557E-09 | 2.48286E-06 | 55122   | AKIRIN2   | 1           |
| GO:0045087 | 10        | innate immune response                               | 12.77803657 | 4.76557E-09 | 2.48286E-06 | 1378    | CR1       | 4           |
| GO:0045087 | 10        | innate immune response                               | 12.77803657 | 4.76557E-09 | 2.48286E-06 | 353514  | LILRA5    | 7           |
| GO:0045087 | 10        | innate immune response                               | 12.77803657 | 4.76557E-09 | 2.48286E-06 | 5608    | MAP2K6    | 8           |

|            |    |                                                          |             |             |             |       |        |    |
|------------|----|----------------------------------------------------------|-------------|-------------|-------------|-------|--------|----|
| GO:0045087 | 10 | innate immune response                                   | 12.77803657 | 4.76557E-09 | 2.48286E-06 | 1432  | MAPK14 | 9  |
| GO:0045087 | 10 | innate immune response                                   | 12.77803657 | 4.76557E-09 | 2.48286E-06 | 4671  | NAIP   | 10 |
| GO:0045087 | 10 | innate immune response                                   | 12.77803657 | 4.76557E-09 | 2.48286E-06 | 58484 | NLRC4  | 11 |
| GO:0045087 | 10 | innate immune response                                   | 12.77803657 | 4.76557E-09 | 2.48286E-06 | 6280  | S100A9 | 13 |
| GO:0045087 | 10 | innate immune response                                   | 12.77803657 | 4.76557E-09 | 2.48286E-06 | 6732  | SRPK1  | 14 |
| GO:0045087 | 10 | innate immune response                                   | 12.77803657 | 4.76557E-09 | 2.48286E-06 | 7100  | TLR5   | 15 |
| GO:0045087 | 10 | innate immune response                                   | 12.77803657 | 4.76557E-09 | 2.48286E-06 | 8876  | VNN1   | 16 |
| GO:0051092 | 11 | positive regulation of NF-kappaB transcription factor ac | 17.71234093 | 0.002707099 | 0.045496726 | 11213 | IRAK3  | 6  |
| GO:0051092 | 11 | positive regulation of NF-kappaB transcription factor ac | 17.71234093 | 0.002707099 | 0.045496726 | 58484 | NLRC4  | 11 |
| GO:0051092 | 11 | positive regulation of NF-kappaB transcription factor ac | 17.71234093 | 0.002707099 | 0.045496726 | 6280  | S100A9 | 13 |
