# Supplementary material for: Long noncoding RNA GSEC promotes neutrophil inflammatory activation by supporting PFKFB3-involved glycolytic metabolism in sepsis
Source: PubMed Central journal article supplement (PMC8671582; doi:10.1038/s41419-021-04428-7), 2021-12-14
Supplement: 41419_2021_4428_MOESM10_ESM.pdf [file 41419_2021_4428_MOESM10_ESM.pdf]

**Supplementary Table 8. 11 metabolic process related upregulated biological processes.**

| go_id      | go_number | go_name                                                          | enrichment         | pvalue             | FDR                | gene_id     | gene_name     | gene_number |
|------------|-----------|------------------------------------------------------------------|--------------------|--------------------|--------------------|-------------|---------------|-------------|
| GO:0005975 | 1         | carbohydrate metabolic process                                   | 11.66552968        | 5.56434E-05        | 0.002709724        | 79623       | GALNT14       | 7           |
| GO:0005975 | 1         | carbohydrate metabolic process                                   | 11.66552968        | 5.56434E-05        | 0.002709724        | 2992        | GYG1          | 9           |
| GO:0005975 | 1         | carbohydrate metabolic process                                   | 11.66552968        | 5.56434E-05        | 0.002709724        | 5209        | PFKFB3        | 12          |
| GO:0005975 | 1         | carbohydrate metabolic process                                   | 11.66552968        | 5.56434E-05        | 0.002709724        | 5226        | PGD           | 13          |
| GO:0005975 | 1         | carbohydrate metabolic process                                   | 11.66552968        | 5.56434E-05        | 0.002709724        | 5230        | PGK1          | 14          |
| GO:0005975 | 1         | carbohydrate metabolic process                                   | 11.66552968        | 5.56434E-05        | 0.002709724        | 5836        | PYGL          | 18          |
| GO:0009437 | 2         | carnitine metabolic process                                      | 321.7741935        | 5.72111E-05        | 0.002709724        | 5447        | POR           | 16          |
| GO:0009437 | 2         | carnitine metabolic process                                      | 321.7741935        | 5.72111E-05        | 0.002709724        | 6583        | SLC22A4       | 20          |
| GO:0042149 | 3         | cellular response to glucose starvation                          | 91.93548387        | 0.000858952        | 0.018646418        | 5562        | PRKAA1        | 17          |
| GO:0042149 | 3         | cellular response to glucose starvation                          | 91.93548387        | 0.000858952        | 0.018646418        | 7378        | UPP1          | 22          |
| GO:0019395 | 4         | fatty acid oxidation                                             | 137.9032258        | 5.22292E-06        | 0.000544228        | 1432        | MAPK14        | 10          |
| GO:0019395 | 4         | fatty acid oxidation                                             | 137.9032258        | 5.22292E-06        | 0.000544228        | 5447        | POR           | 16          |
| GO:0019395 | 4         | fatty acid oxidation                                             | 137.9032258        | 5.22292E-06        | 0.000544228        | 5562        | PRKAA1        | 17          |
| GO:0006006 | 5         | glucose metabolic process                                        | 36.77419355        | 6.79644E-08        | 1.77047E-05        | 2992        | GYG1          | 9           |
| GO:0006006 | 5         | glucose metabolic process                                        | 36.77419355        | 6.79644E-08        | 1.77047E-05        | 1432        | MAPK14        | 10          |
| GO:0006006 | 5         | <b>glucose metabolic process</b>                                 | <b>36.77419355</b> | <b>6.79644E-08</b> | <b>1.77047E-05</b> | <b>5209</b> | <b>PFKFB3</b> | <b>12</b>   |
| GO:0006006 | 5         | <b>glucose metabolic process</b>                                 | <b>36.77419355</b> | <b>6.79644E-08</b> | <b>1.77047E-05</b> | <b>5230</b> | <b>PGK1</b>   | <b>14</b>   |
| GO:0006006 | 5         | glucose metabolic process                                        | 36.77419355        | 6.79644E-08        | 1.77047E-05        | 5562        | PRKAA1        | 17          |
| GO:0006006 | 5         | glucose metabolic process                                        | 36.77419355        | 6.79644E-08        | 1.77047E-05        | 5836        | PYGL          | 18          |
| GO:0005980 | 6         | glycogen catabolic process                                       | 71.50537634        | 0.001438334        | 0.028822008        | 2992        | GYG1          | 9           |
| GO:0005980 | 6         | glycogen catabolic process                                       | 71.50537634        | 0.001438334        | 0.028822008        | 5836        | PYGL          | 18          |
| GO:0008286 | 7         | insulin receptor signaling pathway                               | 17.39319965        | 0.000353376        | 0.01022827         | 528         | ATP6V1C1      | 3           |
| GO:0008286 | 7         | insulin receptor signaling pathway                               | 17.39319965        | 0.000353376        | 0.01022827         | 51719       | CAB39         | 5           |
| GO:0008286 | 7         | insulin receptor signaling pathway                               | 17.39319965        | 0.000353376        | 0.01022827         | 2887        | GRB10         | 8           |
| GO:0008286 | 7         | insulin receptor signaling pathway                               | 17.39319965        | 0.000353376        | 0.01022827         | 5562        | PRKAA1        | 17          |
| GO:0045332 | 8         | phospholipid translocation                                       | 91.93548387        | 0.000858952        | 0.018646418        | 23200       | ATP11B        | 2           |
| GO:0045332 | 8         | phospholipid translocation                                       | 91.93548387        | 0.000858952        | 0.018646418        | 10079       | ATP9A         | 4           |
| GO:0045542 | 9         | positive regulation of cholesterol biosynthetic process          | 257.4193548        | 9.52552E-05        | 0.004135661        | 5447        | POR           | 16          |
| GO:0045542 | 9         | positive regulation of cholesterol biosynthetic process          | 257.4193548        | 9.52552E-05        | 0.004135661        | 5562        | PRKAA1        | 17          |
| GO:2000379 | 10        | positive regulation of reactive oxygen species metabolic process | 47.6702509         | 0.003269795        | 0.048927102        | 1432        | MAPK14        | 10          |
| GO:2000379 | 10        | positive regulation of reactive oxygen species metabolic process | 47.6702509         | 0.003269795        | 0.048927102        | 706         | TSPO          | 22          |
| GO:0044281 | 11        | small molecule metabolic process                                 | 5.193714056        | 3.63744E-05        | 0.002707296        | 55331       | ACER3         | 1           |
| GO:0044281 | 11        | small molecule metabolic process                                 | 5.193714056        | 3.63744E-05        | 0.002707296        | 1545        | CYP1B1        | 6           |
| GO:0044281 | 11        | small molecule metabolic process                                 | 5.193714056        | 3.63744E-05        | 0.002707296        | 2992        | GYG1          | 9           |
| GO:0044281 | 11        | small molecule metabolic process                                 | 5.193714056        | 3.63744E-05        | 0.002707296        | 26873       | OPLAH         | 11          |
| GO:0044281 | 11        | small molecule metabolic process                                 | 5.193714056        | 3.63744E-05        | 0.002707296        | 5209        | PFKFB3        | 12          |

|            |    |                                  |             |             |             |      |      |    |
|------------|----|----------------------------------|-------------|-------------|-------------|------|------|----|
| GO:0044281 | 11 | small molecule metabolic process | 5.193714056 | 3.63744E-05 | 0.002707296 | 5226 | PGD  | 13 |
| GO:0044281 | 11 | small molecule metabolic process | 5.193714056 | 3.63744E-05 | 0.002707296 | 5230 | PGK1 | 14 |
| GO:0044281 | 11 | small molecule metabolic process | 5.193714056 | 3.63744E-05 | 0.002707296 | 9489 | PGS1 | 15 |
| GO:0044281 | 11 | small molecule metabolic process | 5.193714056 | 3.63744E-05 | 0.002707296 | 5836 | PYGL | 18 |
| GO:0044281 | 11 | small molecule metabolic process | 5.193714056 | 3.63744E-05 | 0.002707296 | 6391 | SDHC | 19 |
| GO:0044281 | 11 | small molecule metabolic process | 5.193714056 | 3.63744E-05 | 0.002707296 | 7378 | UPP1 | 22 |
