# Supplementary material for: Long noncoding RNA GSEC promotes neutrophil inflammatory activation by supporting PFKFB3-involved glycolytic metabolism in sepsis
Source: PubMed Central journal article supplement (PMC8671582; doi:10.1038/s41419-021-04428-7), 2021-12-14
Supplement: 41419_2021_4428_MOESM11_ESM.pdf [file 41419_2021_4428_MOESM11_ESM.pdf]

**Supplementary Table 9. 16 significantly changed pathways of the 105 co-expressed mRNAs.**

| path_id | path_name                              | Style | path_diffgene_count | path_gene_count | enrichment | pvalue     | FDR        | -lg(P)      |
|---------|----------------------------------------|-------|---------------------|-----------------|------------|------------|------------|-------------|
| 05134   | Legionellosis                          | Up    | 4                   | 55              | 46.8035191 | 7.0127E-06 | 0.00087658 | 5.15411709  |
| 01100   | Metabolic pathways                     | Up    | 10                  | 1272            | 5.05934267 | 0.00011897 | 0.0074355  | 3.924569846 |
| 04150   | mTOR signaling pathway                 | Up    | 4                   | 151             | 17.0476394 | 0.00038187 | 0.01591107 | 3.418089442 |
| 04621   | NOD-like receptor signaling pathway    | Up    | 4                   | 168             | 15.3225806 | 0.0005758  | 0.01691705 | 3.239726431 |
| 04664   | Fc epsilon RI signaling pathway        | Up    | 3                   | 68              | 28.3918406 | 0.00067668 | 0.01691705 | 3.16961542  |
| 04015   | Rap1 signaling pathway                 | Up    | 4                   | 210             | 12.2580645 | 0.00134738 | 0.02418156 | 2.870509735 |
| 05132   | Salmonella infection                   | Up    | 3                   | 86              | 22.4493623 | 0.00135417 | 0.02418156 | 2.868327604 |
| 04620   | Toll-like receptor signaling pathway   | Up    | 3                   | 104             | 18.5638958 | 0.00236143 | 0.03660478 | 2.626824582 |
| 04668   | TNF signaling pathway                  | Up    | 3                   | 108             | 17.8763441 | 0.00263554 | 0.03660478 | 2.579129657 |
| 01200   | Carbon metabolism                      | Up    | 3                   | 116             | 16.6434928 | 0.00324283 | 0.04053533 | 2.489076334 |
| 04152   | AMPK signaling pathway                 | Up    | 3                   | 121             | 15.9557451 | 0.0036639  | 0.04163525 | 2.436056133 |
| 04380   | Osteoclast differentiation             | Up    | 3                   | 128             | 15.0831653 | 0.00430933 | 0.04488889 | 2.365589917 |
| 04910   | Insulin signaling pathway              | Up    | 3                   | 138             | 13.9901823 | 0.00534938 | 0.04846428 | 2.271696376 |
| 05418   | Fluid shear stress and atherosclerosis | Up    | 3                   | 139             | 13.8895335 | 0.00546127 | 0.04846428 | 2.262706387 |
| 00500   | Starch and sucrose metabolism          | Up    | 2                   | 36              | 35.7526882 | 0.00581571 | 0.04846428 | 2.235396978 |
| 05206   | MicroRNAs in cancer                    | Down  | 2                   | 299             | 33.361204  | 0.00635338 | 0.12071414 | 2.196995455 |
