# Supplementary material for: Long noncoding RNA GSEC promotes neutrophil inflammatory activation by supporting PFKFB3-involved glycolytic metabolism in sepsis
Source: PubMed Central journal article supplement (PMC8671582; doi:10.1038/s41419-021-04428-7), 2021-12-14
Supplement: 41419_2021_4428_MOESM12_ESM.pdf [file 41419_2021_4428_MOESM12_ESM.pdf]

**Supplementary Table 10. 11 upregulated immune response pathways.**

| <b>path_id</b> | <b>path_number</b> | <b>path_name</b>                     | <b>enrichment</b> | <b>pvalue</b> | <b>FDR</b> | <b>gene_id</b> | <b>gene_name</b> | <b>gene_number</b> |
|----------------|--------------------|--------------------------------------|-------------------|---------------|------------|----------------|------------------|--------------------|
| 05134          | 1                  | Legionellosis                        | 46.8035191        | 7.0127E-06    | 0.00087658 | 1378           | CR1              | 5                  |
| 05134          | 1                  | Legionellosis                        | 46.8035191        | 7.0127E-06    | 0.00087658 | 4671           | NAIP             | 13                 |
| 05134          | 1                  | Legionellosis                        | 46.8035191        | 7.0127E-06    | 0.00087658 | 58484          | NLRC4            | 14                 |
| 05134          | 1                  | Legionellosis                        | 46.8035191        | 7.0127E-06    | 0.00087658 | 7100           | TLR5             | 20                 |
| 04621          | 2                  | NOD-like receptor signaling pathway  | 15.3225806        | 0.0005758     | 0.01691705 | 84674          | CARD6            | 4                  |
| 04621          | 2                  | NOD-like receptor signaling pathway  | 15.3225806        | 0.0005758     | 0.01691705 | 1432           | MAPK14           | 12                 |
| 04621          | 2                  | NOD-like receptor signaling pathway  | 15.3225806        | 0.0005758     | 0.01691705 | 4671           | NAIP             | 13                 |
| 04621          | 2                  | NOD-like receptor signaling pathway  | 15.3225806        | 0.0005758     | 0.01691705 | 58484          | NLRC4            | 14                 |
| 05132          | 3                  | Salmonella infection                 | 22.4493623        | 0.00135417    | 0.02418156 | 1432           | MAPK14           | 12                 |
| 05132          | 3                  | Salmonella infection                 | 22.4493623        | 0.00135417    | 0.02418156 | 58484          | NLRC4            | 14                 |
| 05132          | 3                  | Salmonella infection                 | 22.4493623        | 0.00135417    | 0.02418156 | 7100           | TLR5             | 20                 |
| 04620          | 4                  | Toll-like receptor signaling pathway | 18.5638958        | 0.00236143    | 0.03660478 | 5608           | MAP2K6           | 11                 |
| 04620          | 4                  | Toll-like receptor signaling pathway | 18.5638958        | 0.00236143    | 0.03660478 | 1432           | MAPK14           | 12                 |
| 04620          | 4                  | Toll-like receptor signaling pathway | 18.5638958        | 0.00236143    | 0.03660478 | 7100           | TLR5             | 20                 |
| 04668          | 5                  | TNF signaling pathway                | 17.8763441        | 0.00263554    | 0.03660478 | 8809           | IL18R1           | 10                 |
| 04668          | 5                  | TNF signaling pathway                | 17.8763441        | 0.00263554    | 0.03660478 | 5608           | MAP2K6           | 11                 |
| 04668          | 5                  | TNF signaling pathway                | 17.8763441        | 0.00263554    | 0.03660478 | 1432           | MAPK14           | 12                 |
