# Supplementary material for: Long noncoding RNA GSEC promotes neutrophil inflammatory activation by supporting PFKFB3-involved glycolytic metabolism in sepsis
Source: PubMed Central journal article supplement (PMC8671582; doi:10.1038/s41419-021-04428-7), 2021-12-14
Supplement: 41419_2021_4428_MOESM13_ESM.pdf [file 41419_2021_4428_MOESM13_ESM.pdf]

**Supplementary Table 11. 6 upregulated metabolic process pathways.**

| path_id | path_number | path_name                     | enrichment | pvalue     | FDR        | gene_id | gene_name | gene_number |
|---------|-------------|-------------------------------|------------|------------|------------|---------|-----------|-------------|
| 04152   | 1           | AMPK signaling pathway        | 15.9557451 | 0.0036639  | 0.04163525 | 51719   | CAB39     | 3           |
| 04152   | 1           | AMPK signaling pathway        | 15.9557451 | 0.0036639  | 0.04163525 | 5209    | PFKFB3    | 18          |
| 04152   | 1           | AMPK signaling pathway        | 15.9557451 | 0.0036639  | 0.04163525 | 5562    | PRKAA1    | 22          |
| 01200   | 2           | Carbon metabolism             | 16.6434928 | 0.00324283 | 0.04053533 | 5226    | PGD       | 19          |
| 01200   | 2           | Carbon metabolism             | 16.6434928 | 0.00324283 | 0.04053533 | 5230    | PGK1      | 20          |
| 01200   | 2           | Carbon metabolism             | 16.6434928 | 0.00324283 | 0.04053533 | 6391    | SDHC      | 24          |
| 04910   | 3           | Insulin signaling pathway     | 13.9901823 | 0.00534938 | 0.04846428 | 2319    | FLOT2     | 7           |
| 04910   | 3           | Insulin signaling pathway     | 13.9901823 | 0.00534938 | 0.04846428 | 5562    | PRKAA1    | 22          |
| 04910   | 3           | Insulin signaling pathway     | 13.9901823 | 0.00534938 | 0.04846428 | 5836    | PYGL      | 23          |
| 01100   | 4           | Metabolic pathways            | 5.05934267 | 0.00011897 | 0.0074355  | 249     | ALPL      | 1           |
| 01100   | 4           | Metabolic pathways            | 5.05934267 | 0.00011897 | 0.0074355  | 528     | ATP6V1C1  | 2           |
| 01100   | 4           | Metabolic pathways            | 5.05934267 | 0.00011897 | 0.0074355  | 79623   | GALNT14   | 8           |
| 01100   | 4           | Metabolic pathways            | 5.05934267 | 0.00011897 | 0.0074355  | 2992    | GYG1      | 10          |
| 01100   | 4           | Metabolic pathways            | 5.05934267 | 0.00011897 | 0.0074355  | 5226    | PGD       | 19          |
| 01100   | 4           | Metabolic pathways            | 5.05934267 | 0.00011897 | 0.0074355  | 5230    | PGK1      | 20          |
| 01100   | 4           | Metabolic pathways            | 5.05934267 | 0.00011897 | 0.0074355  | 9489    | PGS1      | 21          |
| 01100   | 4           | Metabolic pathways            | 5.05934267 | 0.00011897 | 0.0074355  | 5836    | PYGL      | 23          |
| 01100   | 4           | Metabolic pathways            | 5.05934267 | 0.00011897 | 0.0074355  | 6391    | SDHC      | 24          |
| 01100   | 4           | Metabolic pathways            | 5.05934267 | 0.00011897 | 0.0074355  | 7378    | UPP1      | 27          |
| 04150   | 5           | mTOR signaling pathway        | 17.0476394 | 0.00038187 | 0.01591107 | 528     | ATP6V1C1  | 2           |
| 04150   | 5           | mTOR signaling pathway        | 17.0476394 | 0.00038187 | 0.01591107 | 51719   | CAB39     | 3           |
| 04150   | 5           | mTOR signaling pathway        | 17.0476394 | 0.00038187 | 0.01591107 | 2887    | GRB10     | 9           |
| 04150   | 5           | mTOR signaling pathway        | 17.0476394 | 0.00038187 | 0.01591107 | 5562    | PRKAA1    | 22          |
| 00500   | 6           | Starch and sucrose metabolism | 35.7526882 | 0.00581571 | 0.04846428 | 2992    | GYG1      | 10          |
| 00500   | 6           | Starch and sucrose metabolism | 35.7526882 | 0.00581571 | 0.04846428 | 5836    | PYGL      | 23          |
