# Supplementary material for: Long noncoding RNA GSEC promotes neutrophil inflammatory activation by supporting PFKFB3-involved glycolytic metabolism in sepsis
Source: PubMed Central journal article supplement (PMC8671582; doi:10.1038/s41419-021-04428-7), 2021-12-14
Supplement: 41419_2021_4428_MOESM14_ESM.pdf [file 41419_2021_4428_MOESM14_ESM.pdf]

**Supplementary Table 12. Basic clinical data of the included participants.**

|                                                 | <b>Septic patients</b> | <b>Healthy volunteers</b> | <b>P value</b> |
|-------------------------------------------------|------------------------|---------------------------|----------------|
| Size (n)                                        | 20                     | 10                        |                |
| Age (years)                                     | 62.85±7.62             | 66.40±6.26                | 0.214          |
| Male (%)                                        | 13(65.00)              | 7(70.00)                  | 0.784          |
| Absolute lymphocyte count (×10 <sup>9</sup> /L) | 0.98±0.32              | 1.18±0.24                 | 0.085          |
| Absolute neutrophil count (×10 <sup>9</sup> /L) | 15.45±4.39             | 5.42±0.84                 | 0.000          |
| Absolute eosinophil count (×10 <sup>9</sup> /L) | 0.17±0.01              | 0.10±0.004                | 0.084          |
| Eosinophil/ neutrophil (%)                      | 0.12±0.09              | 0.18±0.07                 | 0.094          |
| SOFA score                                      | 12.60±3.79             | ---                       | ---            |
| APACHE II score                                 | 26.70±3.66             | ---                       | ---            |
| Primary site of infection                       |                        | ---                       | ---            |
| Respiratory system (%)                          | 10 (50.00)             | ---                       | ---            |
| Digestive system (%)                            | 6 (30.00)              | ---                       | ---            |
| Urinary system (%)                              | 4 (20.00)              | ---                       | ---            |
| Pathogenic bacteria of infection                |                        | ---                       | ---            |
| Gram-negative bacillus (%)                      | 15 (75.00)             | ---                       | ---            |
| Gram-positive cocci (%)                         | 5 (25.00)              |                           |                |

SOFA: sequential organ failure assessment; APACHE II: Acute Physiology and Chronic Health Evaluation II.
