# Supplementary material for: Long noncoding RNA GSEC promotes neutrophil inflammatory activation by supporting PFKFB3-involved glycolytic metabolism in sepsis
Source: PubMed Central journal article supplement (PMC8671582; doi:10.1038/s41419-021-04428-7), 2021-12-14
Supplement: 41419_2021_4428_MOESM15_ESM.pdf [file 41419_2021_4428_MOESM15_ESM.pdf]

**Supplementary Table 13. The targeting sequences (blue) of GSEC shRNAs.**

| Name           | Sequence                                                                                                                                                                                                                                                                                                                                                                                                                                                                                                                                                                                                                                                                                                                                                                                                                                                                                                                                                                                                                                                                            |
|----------------|-------------------------------------------------------------------------------------------------------------------------------------------------------------------------------------------------------------------------------------------------------------------------------------------------------------------------------------------------------------------------------------------------------------------------------------------------------------------------------------------------------------------------------------------------------------------------------------------------------------------------------------------------------------------------------------------------------------------------------------------------------------------------------------------------------------------------------------------------------------------------------------------------------------------------------------------------------------------------------------------------------------------------------------------------------------------------------------|
| Lenti-GSEC-sh1 | <p>AAGATTACAAAACAAATTACAAAATTCAAAATTTTCGGGTTTATTACAGGGACAGCAGAGATCCAGTTTGGTTAATTA<br/>           ATCGAGCGGCCGCCCTTCACCGAGGGCCTATTTCCCATGATTCCTTCATATTTGCATATACGATACAAGGCTGTTAGA<br/>           GAGATAATTGGAATTAATTTGACTGTAAACACAAAGATATTAGTACAAAATACGTGACGTAGAAAGTAATAATTTCTTG<br/>           GGTAGTTTGCAGTTTTTAAAATTATGTTTTTAAAATGGACTATCATATGCTTACCGTAACTTGAAAGTATTTTCGATTTCTTGG<br/>           CTTTATATATCTTGTGGAAAGGACGAAACA<b>CCGGGGTCACAACAGTACAAAGACTCGAGTCTTTGTACTGTTGTGACCTT</b><br/> <b>TTTGA</b>ATTCTCGACCTCGAGACAAATGGCAGTATTCATCCACGGATCCTAACCCGTGTCGGCTCCAACATAACTTACGGT<br/>           AAATGGCCCCGCTGGCTGACCGCCCAACGACCCCGCCATTGACGTCAATAGTAACGCCAATAGGGACTTTCCATTGA<br/>           CGTCAATGGGTGGAGTATTTACGGTAAACTGCCCACTTGGCAGTACATCAAGTGTATCATATGCCAAGTACGCCCCCTAT<br/>           TGACGTCAATGACGGTAAATGGCCCCGCTGGCATTGTGCCCAGTACATGACCTTATGGGACTTTTCTACTTGGCAGTACA<br/>           TCTACGTATTAGTCATCGCTATTACCATGGTCGAGGTGAGCCCCACGTTCTGCTTCACTCTCCCCATCTCCCCCTCCCC<br/>           ACCCCAATTTTGTATTTATTTATTTTAAATTATTTTGTGCAGCGATGGGGGCGGGGGGGGGGGGGGGCGCGCGCAAG</p> |
| Lenti-GSEC-sh2 | <p>ATTCAAAACAAATTACAAAATTCAAAATTTTCGGGTTTATTACAGGGACAGCAGAGATCCAGTTTGGTTAATTAATCG<br/>           AGCGGCCGCCCTTCACCGAGGGCCTATTTCCCATGATTCCTTCATATTTGCATATACGATACAAGGCTGTTAGAGAGA<br/>           TAATTGGAATTAATTTGACTGTAAACACAAAGATATTAGTACAAAATACGTGACGTAGAAAGTAATAATTTCTTGGGTA<br/>           GTTTGCAGTTTTTAAAATTATGTTTTTAAAATGGACTATCATATGCTTACCGTAACTTGAAAGTATTTTCGATTTCTTGGCTTT<br/>           ATATATCTTGTGGAAAGGACGAAACA<b>CCGGCCAACTATGCCATGGTCTTCTCGAGAAGACCATGGC</b>ATAGTTGGTTTTT<br/> <b>G</b>AATTCTCGACCTCGAGACAAATGGCAGTATTCATCCACGGATCCTAACCCGTGTCGGCTCCAACATAACTTACGGTAA<br/>           ATGGCCCCGCTGGCTGACCGCCCAACGACCCCGCCATTGACGTCAATAGTAACGCCAATAGGGACTTTCCATTGACG<br/>           TCAATGGGTGGAGTATTTACGGTAAACTGCCCACTTGGCAGTACATCAAGTGTATCATATGCCAAGTACGCCCCCTATTG<br/>           ACGTCAATGACGGTAAATGGCCCCGCTGGCATTGTGCCCAGTACATGACCTTATGGGACTTTTCTACTTGGCAGTACATC<br/>           TACGTATTAGTCATCGCTATTACCATGGTCGAGGTGAGCCCCACGTTCTGCTTCACTCTCCCCATCTCCCCCTCCCCAC<br/>           CCCAATTTTGTATTTATTTATTTTAAATTATTTTGTGCAGCGATGGGGGCGGGGGGGGGGGGGGGCGCGCGCCA</p>      |
| Lenti-GSEC-OE  | <p>CCGTTTTTGGCTTTTTTGTAGACGAAGCTTGGGCTGCAGGTGACTCTAGAGGATCCCCGGGT<b>ACCGGT</b><br/> <b>TAGAAAGGGCGGGGTGGAGGAGGGGAAGGGCGGGGGT</b>GATGCCGCGCGGTTCGCAGGCTTGGGATGG</p>                                                                                                                                                                                                                                                                                                                                                                                                                                                                                                                                                                                                                                                                                                                                                                                                                                                                                                                  |

TGTTTCGCGCCTCCGAGACCCGGACAGAGGCAAGCAGGGGGCGCCGTGGGTGCCAGAGAGGGCGGAAGAGG  
AGGCCTGATGGGGTCAGCACAGTGTTTCCGGAGCCCCACGTATCAACAGCCCAGTGCCGGGAGCGCCAG  
GGGCTCCAAGGAAACTATCAGACCCATTCCCTGTCCCCAGGAAGCTTACCATCCAGCGGCACAGAGAAG  
GCTCACCATGGACTCCATTCAAGAACGAGGCAGGATAGGATGTGAATAAGTGCAAGGTGTGAGTGACT  
GACAGTAAGTGCAAGGGGGTTCAGAGAAGTGGCAGCTCCAAGCCTGCTTCTGCTGAAGCTGGAGGGCTT  
ATCTGTCAAGAACCCCCAACTCAGGAAGCTCTGCTCCAAGTGAGCTGAGTAAGGAGAGTCTGCCTCCAA  
GTTGTTCCCTCTGCAGGTGACTGTGCTCCATGCTAAATCATTCCCTTGACGGGCAGAAGCTGTTTGGCATT  
GCACCAGTGTCTGATTTTGTGTTGAATATGGTGCCTTTGGCTTAATCAGTCAGACATGCATTCAACAATA  
TTTATTTATTTATTTATTTATTTATTTATTTATTATTTTGGAGACAGAGTCTCGCTCTGTCGCCAGGCGGAG  
GTTGCAGTGAGCCGAGATTGAGCCACTGCACTCCAGCCTGGCAACAGAGTGAGACTGTCTCAAAAAGTA  
AATAAATAGAACTCTTGGTTCCATGCGTAGTCTAGCATTTTGTAGCACTTCTAATCACGAAGTTATTTT  
TAATATTTGTTTGGTCTGTTATACAAAATGTAGACTGGATGGCTTATAAACTACAGAAATCTCTCACAGT  
TCTGTAGGCTAGAAAGTCTAAGATGAAGATGCCAGCAGCCTGCTTCCCTGGTTCATACAAGGTCATCTTCT  
CACTGTAACCTCACAGTGAGAGGAAGGGCCTAGGGGTGACTCTGGGATCTCTTTTATGAGGCACTAATC  
CCATTAATGGGGGCCCCCACCTCATGGCCTAATCACCTCCCAAAGGCCCCACGATTGCCTTGGGTGTT  
AGGATTTCCACATATGAATTTTAGGGGAACACAGACGTTCAAGGCCATAGCAAATATCTTGCCCAAATAT  
CTCTAGTTCATCCTTTTGGTCACTCTCAGACCAGAACATTTACTGAGTGATTACTATGTCCCACAAAAT  
TCTTATTTAACCTCAGAAAAACCGTCTGGGGGAAGCATTGTTATCACTCCTATTTTCATGAGCAGTTATG  
TAACTTGCCCCAGATAAGACTTGGTTATGGCACAGATTCTGTGTTGGAGCCTTCAGACCACTCTACTTCC  
CAAGCAGGGGAGGAACAGAACATTAAGATTTTCTTGGCCTTGGCTTTCATTTCTTCATCGTGGTTCTGA  
AAGGAAAATTGGCTACAGTCTTAAATGTATGTGTGGGCCACGCTAGAAGCTCAGCTCTCAGTGCCAGC  
CACACTGAGCCCTGGTCTCCCTAACTTCCGGGCCTTACTCTGCTTGTCATTGGGCTGATAACCAAGATC  
CAGCCTAGAGCACAAGAAGACAAACGCTGCGTGATCTCGTGTGTAGAACCTAACAAAGTGGAACCTCAC  
AGAAGCAGAGAGTAGAATGGTGGTTGCCTGTTGGAATGGGGAGATGGTCAGAGAATGCAAACCTTTCAG  
TTGGATGGGAGGAAGAAGTTCCAGAGATCTATTGTGCCACATGGTGACAATAGTTAATAACAATGTACT  
GGGCGGGGGGTGGTGGCCTACGCCTGTAATCCCAGCACTTTGGGAAGCTGAGGCAGACAGATCACTTGA  
GGTCAGGAGTTCTAGACCAGCTTGTCCAACATGGTGAAACCCCGTCTCTACTATAAACTACAAAATTA  
GCCAGGTGTGGTGGTGTGCGC;TGTAATCTCAGCTACTTGGGAGGCTGAATCGCTTGAACCCAGGAGGT

GGAGGTTGCAGTGAGTCGAGACTGCGCCACTGCCCTCCAGCCTGGGTGACACAGTGAGACTCTGTTTCA  
AAAAAACAAAAAAGCAATGTACTGTATACTTGAAAATTGCTCACAGAGATTTTAAATGTTCTCACCAT  
TACAAAATGATAAATATGTGACATAATGCATATGTTAATTAGCCCGATTTAGTGATTCCACAGTGTATAC  
ATATAACAAAACATGTTGTACACCATAAATGTATACTATTTTTATTTGCCAATTAATATATTTTTTTTAAA  
GTGGATACCTTCCTGCTGTCCTTCCTGAGCACAACTGGCTGAAAACCTGGAGGTCACAACAGTACAAA  
GAATCAAAGTCAAGATCTTGTGCCAGAGAGCAAATGAACTCTTCCTCTTGCTGAGAAAACCCACCCTGC  
TCACCTAAACCCTGGCCTTGCCTGGTAATTCCATCCATGCGCCTGGAAGGCCCCAGACATCAAGGCTCTG  
AGGGGCCAGGCACGGGGAGAACCCAGCAGTGCCCTGCCCTGCAGTCTGAGCTACCAGATTCCTTGTGAA  
GATAATTTGAGGACCATGACTCACCCAACCACATTTCTGGGGCCTCAAATTGAAAATTCAGGATGGGC  
TTTTCTATATGACTGGCTGATATCCAACATGCCATGGTCTTTACATGCCATGAACATTCTTTCTGCCAG  
AGTTCTAAGAATCTGTGTTCTCTGCCTTAGACCTTCTGCAGATGAGCCACAGGAAGCTCCACGTGTAGC  
TGAGCTACATGCACCAGGCCCTCAGTTTGCCCCAAGTCCCCTGTGTACTCTCTCATGGCCTGTGGCCAAGA  
AATGTATTCTCTCACTTTGGACTTAGGAGTCCAAAGAGAAGCCCAGAAACAAAATTGCTTGAACCTGAA  
TTTGTGTGCGTGCGCACGTGTGCACGTGGTGGTGAAGGTGTATGTTTTCGGCTGTTCTATGCGTCACTGT  
CACCAAACCTCCCAAATAATAGTAACATTTGTTTAGATGATGTCTGCTGACAAATCACAAACACGACGCT  
AACTCGCAACTCTCTGCTCCACTGGCACAGAATAGGGCATGGAGCCTGGTGCTGGGTGTCAGCCCATGG  
TGTTGGGTGTCAGTTCACAGGCTGGGTAAGGGAGGGAAAATAATCCATTCTTTGATATTAGACATGACC  
CAAAATTTCTGCTGGCAGCCAAAGGCCTCCTCGCTCAGAGAAGTCATCTGAAAAAAGCTAGCCCAGGG  
GCAGGAAAGGGCCTCAGGCTGGCGCCCCAGAAGGTGGCCCATCAGTCACTCTGGGAAGACAGATAGAC  
ATCGTCAGTCTCTTTTTACAAGTCAAGACAGTAAAATCAAAGTAATAGTTTCCTGGCAGGAAGAAAGAG  
AATTGCTGGAGCGTTGGAGAGCCATCTCTTAACCTCTGGGGTGACTCAAAGGAAGAGTTGCCTGGTCTG  
AGA ACTTTAGACCAAAGAATTTAAATCATGTGAACTGAAAATGCATGTGTATCCATATATACATGTACA  
TATATGTTTATATACCCAATATAGAAAGGTTACCAGAGACAAAGAAATAGCAACAATAGTTGTTTTGGG  
GAAGGGAAAGGAAGGGCTGTGGGGTGAGGAAGCATACTTTCACTGAATATCGCTAGCCTGTGGAATGT  
GTGTCAGTTAGGGTGTGGAAAGTCCCCAGGCTCCCCAGCAGGCAGAAGTATGCAAAGCATGCATCTCAA  
TTAGTCAGCAACCAGGTGTGG
