# Supplementary material for: Long noncoding RNA GSEC promotes neutrophil inflammatory activation by supporting PFKFB3-involved glycolytic metabolism in sepsis
Source: Cell Death Dis. 2021 Dec 14;12(12):1157. doi: 10.1038/s41419-021-04428-7 (PMC8671582; doi:10.1038/s41419-021-04428-7)
Supplement: Supplementary file 2 — Supplementary Figures [file 41419_2021_4428_MOESM2_ESM.pdf]

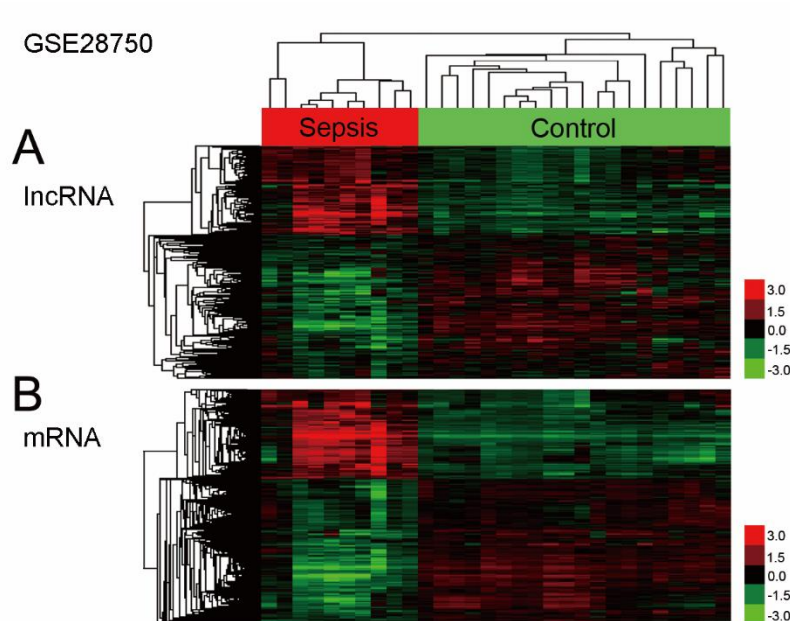

**Supplementary Fig. 1 Identification of differentially expressed lncRNAs and mRNAs in immunocytes of septic patients. A** Heat map of 722 differentially expressed lncRNAs (including 277 upregulated and 445 downregulated lncRNAs) identified in the microarrays in the GSE28750 dataset. **B** Heat map of 6,610 differentially expressed mRNAs (including 2,530 upregulated and 4,080 downregulated mRNAs) identified in the microarrays in the GSE28750 dataset.

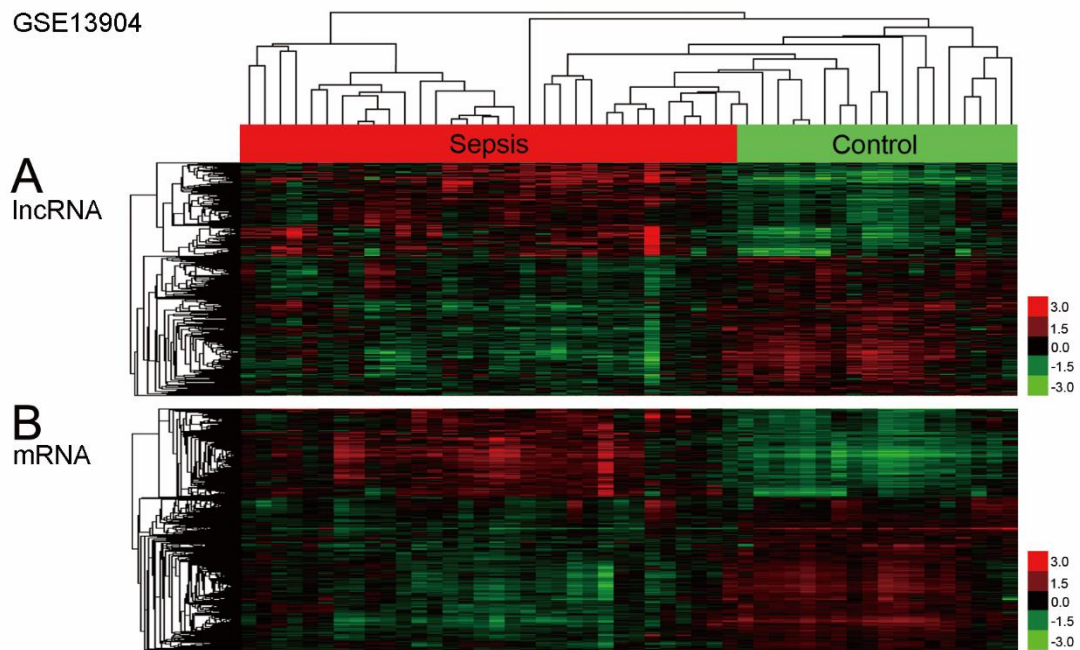

**Supplementary Fig. 2 Identification of differentially expressed lncRNAs and mRNAs in immunocytes of septic patients.** **A** Heat map of 580 differentially expressed lncRNAs (233 upregulated and 347 downregulated) identified in the microarrays in the GSE13904 dataset. **B** Heat map of 6,073 differentially expressed mRNAs (including 2,217 upregulated and 3,856 downregulated mRNAs) identified in the microarrays in the GSE13904 dataset.

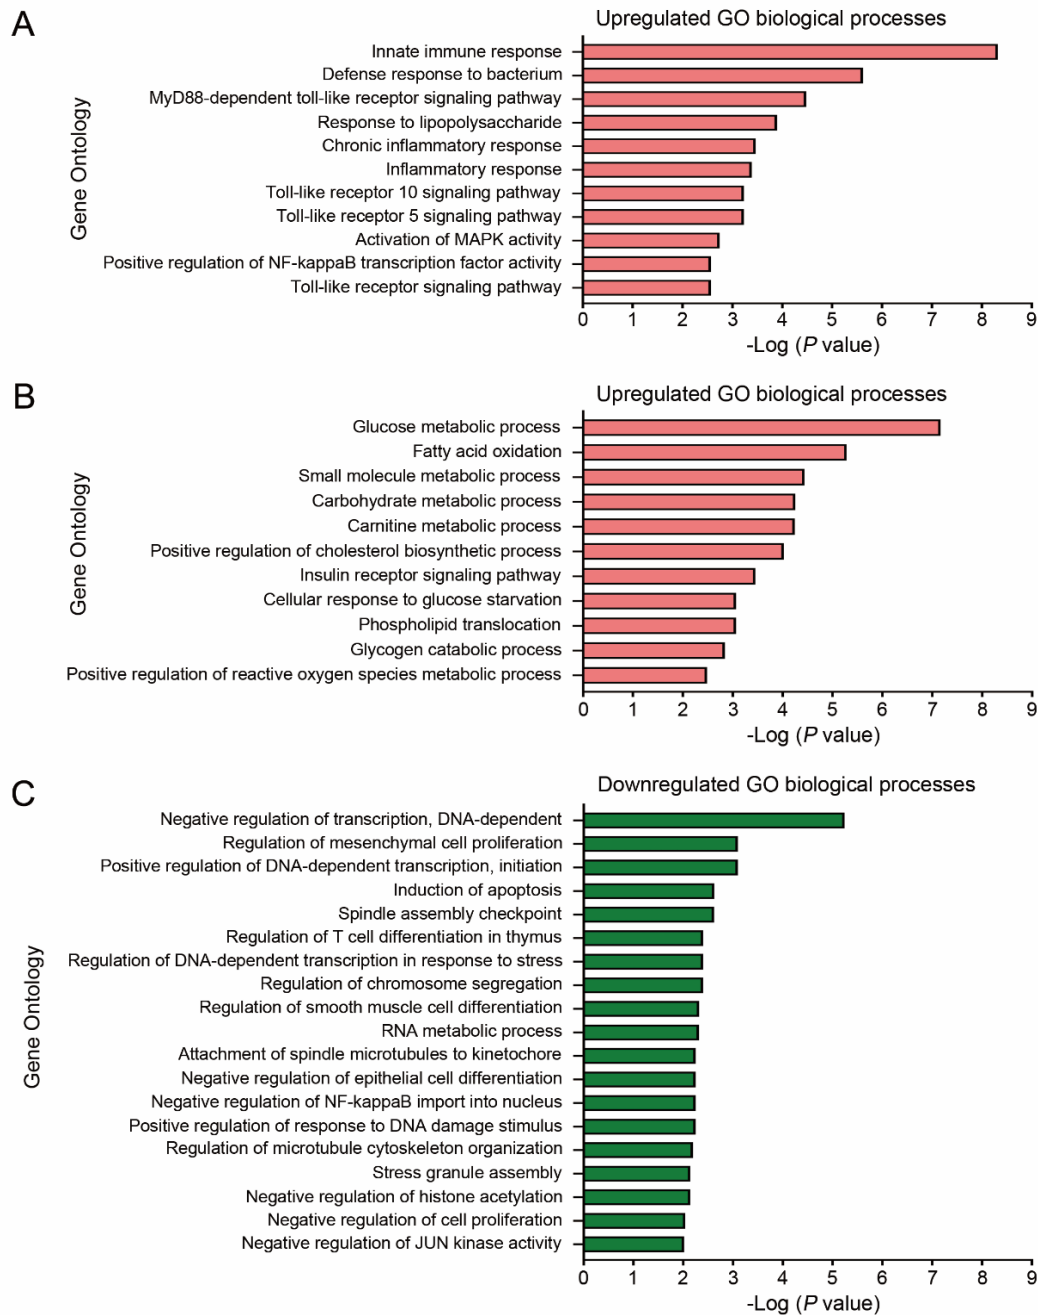

**Supplementary Fig. 3 GO biological process of the co-expressed mRNAs.** **A** Significantly upregulated biological processes were related to the immune response. **B** Significantly upregulated biological processes were related to metabolic processes. **C** Significantly downregulated biological processes were related to cell differentiation and gene transcription. The y-axis shows the GO category and the x-axis shows the negative logarithm of the *P* value (-Log (*P* value)).

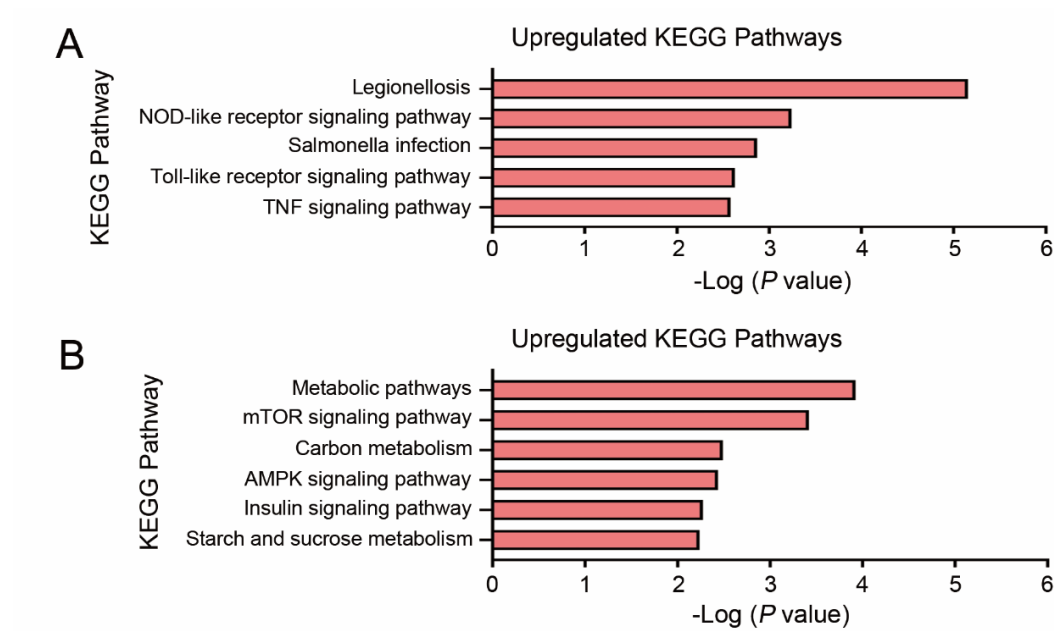

**Supplementary Fig. 4 KEGG Pathway analysis of the co-expressed mRNAs. A** Significantly upregulated pathways were related to the immune response. **B** Significantly upregulated pathways were related to metabolic processes. The y-axis shows the pathway category and the x-axis shows the negative logarithm of the  $P$  value ( $-\log(P \text{ value})$ ).

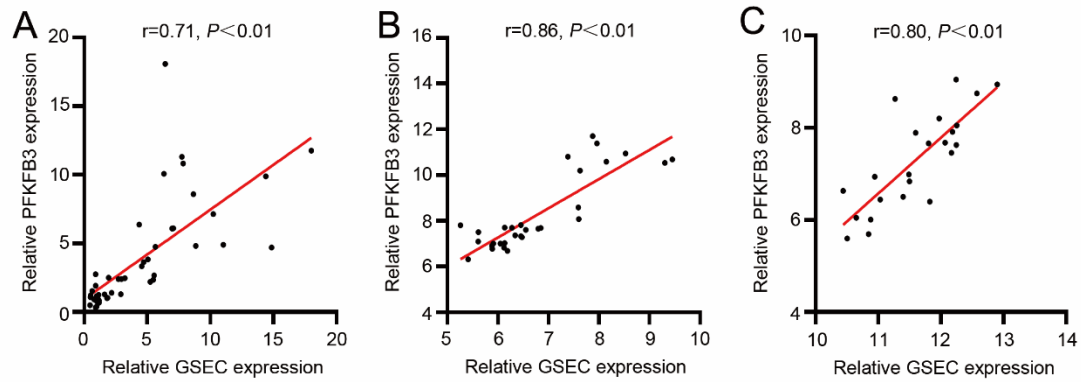

**Supplementary Fig. 5 Correlation of GSEC and PFKFB3 genes in immunocytes of septic patients from 3 GEO datasets.** **A** Correlation of GSEC and PFKFB3 genes in septic leucocytes in the GSE13904 dataset. **B** Correlation of the GSEC and PFKFB3 genes in septic leucocytes in the GSE28750 dataset. **C** Correlation of the GSEC and PFKFB3 genes in septic neutrophils in the GSE64457 dataset. Statistics were calculated using Pearson analysis.

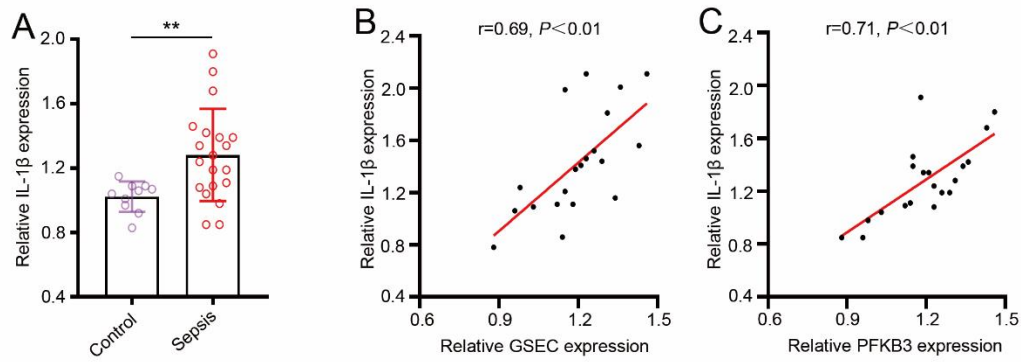

**Supplementary Fig. 6 Expression and correlation of interleukin (IL)-1 $\beta$  gene in septic neutrophils.** **A** Expression of IL-1 $\beta$  gene in septic neutrophils. **B** Correlation of IL-1 $\beta$  and GSEC in septic neutrophils. **C** Correlation of IL-1 $\beta$  and PFKFB3 mRNA in septic neutrophils. For each group: septic patients:  $n = 20$ , healthy volunteers:  $n = 10$ , three independent experiments. Statistics were calculated using Student's  $t$  test (A) or Pearson analysis (B and C). \*\* $P < 0.01$ .

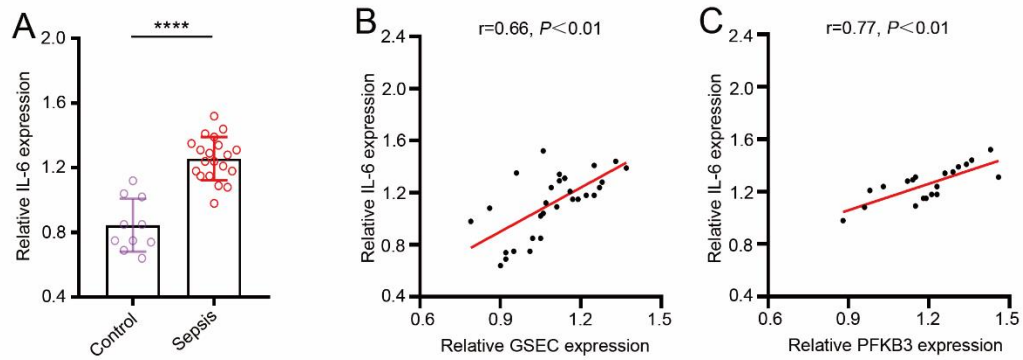

**Supplementary Fig. 7 Expression and correlation of IL-6 gene in septic neutrophils.**

**A** Expression of IL-6 gene in septic neutrophils. **B** Correlation of IL-6 and GSEC in septic neutrophils. **C** Correlation of IL-6 and PFKFB3 mRNA in septic neutrophils. For each group: septic patients:  $n = 20$ , healthy volunteers:  $n = 10$ , three independent experiments. Statistics were calculated using Student's t test (A) or Pearson analysis (B and C). \*\*\*\* $P < 0.0001$ .

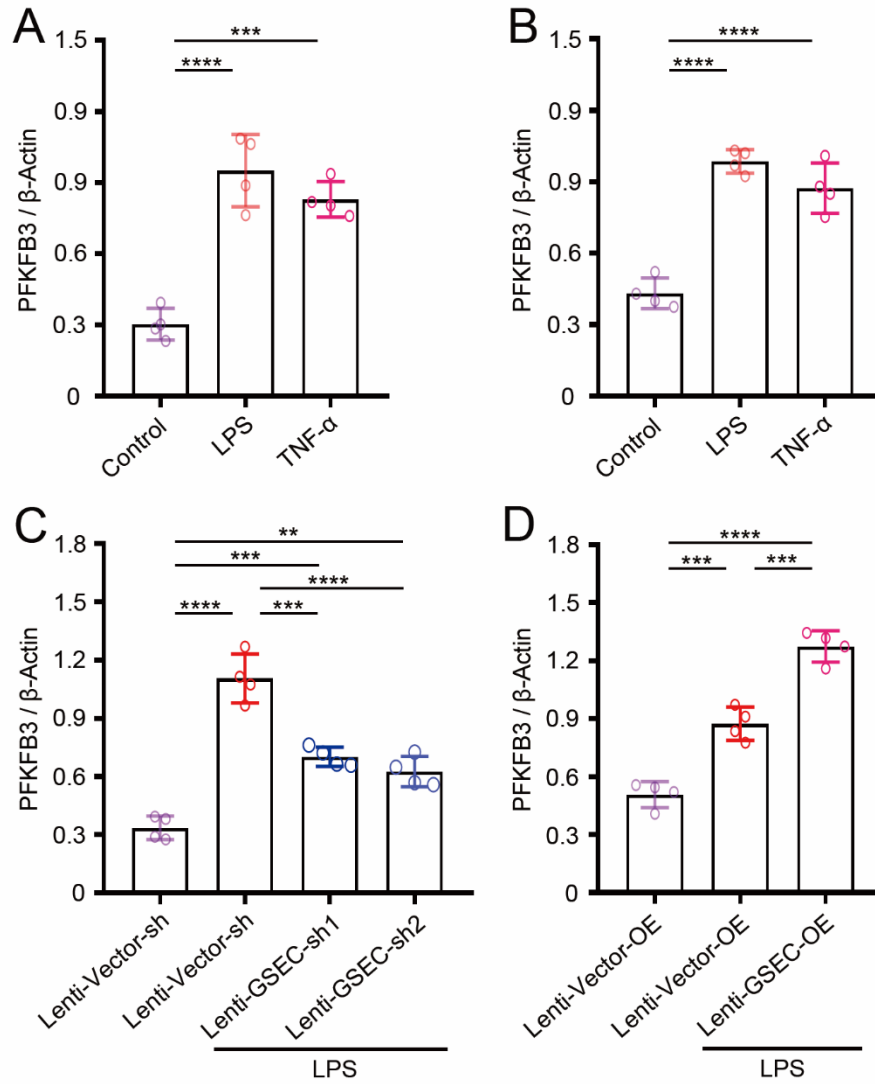

**Supplementary Fig. 8 The average ratio of PFKFB3/ $\beta$ -Actin.** **A** The average ratio of PFKFB3/ $\beta$ -Actin in primary human neutrophils. **B** The average ratio of PFKFB3/ $\beta$ -Actin in dHL-60 cells. **C** The average ratio of PFKFB3/ $\beta$ -Actin in GSEC-knockdown dHL-60 cells. **D** The average ratio of PFKFB3/ $\beta$ -Actin in GSEC-overexpressing dHL-60 cells. For all experiments: n = 4 per group, three independent experiments. Statistics were calculated using one-way ANOVA. \*\* $P$  < 0.01, \*\*\* $P$  < 0.001, \*\*\*\* $P$  < 0.0001.

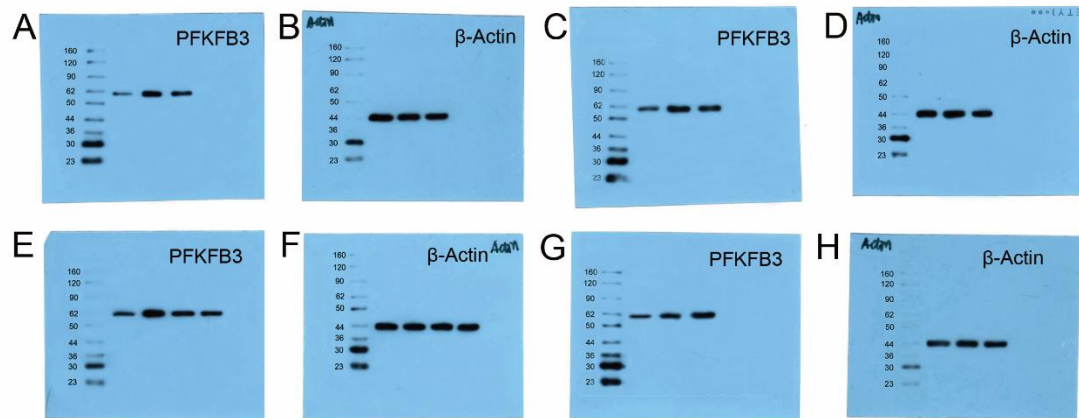

**Supplementary Fig. 9 The original western blot bands of PFKFB3 and  $\beta$ -Actin.**

**A** The original bands of PFKFB3 in primary human neutrophils. **B** The original bands of  $\beta$ -Actin in primary human neutrophils. **C** The original bands of PFKFB3 in dHL-60 cells. **D** The original bands of  $\beta$ -Actin in dHL-60 cells. **E** The original bands of PFKFB3 in GSEC-knockdown dHL-60 cells. **F** The original bands of  $\beta$ -Actin in GSEC-knockdown dHL-60 cells. **G** The original bands of PFKFB3 in GSEC-overexpressing dHL-60 cells. **H** The original bands of  $\beta$ -Actin in GSEC-overexpressing dHL-60 cells.

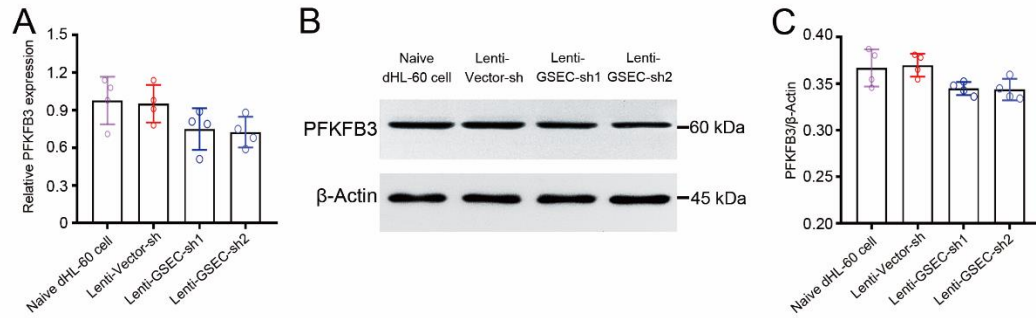

**Supplementary Fig. 10 The expression of PFKFB3 in GSEC-knockdown dHL-60 cells without LPS stimulation.** **A** GSEC knockdown did not decrease the expression of PFKFB3 mRNA in dHL-60 cells without LPS stimulation. **B** Western blot analysis showed that GSEC knockdown did not decrease the expression of PFKFB3 in dHL-60 cells without LPS stimulation. **C** The average ratio of PFKFB3/β-Actin in GSEC-knockdown dHL-60 cells without LPS stimulation. Neutrophils and dHL-60 cells were treated LPS or TNF-α for 12 hours. For all experiments: n = 4 per group, three independent experiments. Statistics were calculated using one-way ANOVA with Tukey post-tests.

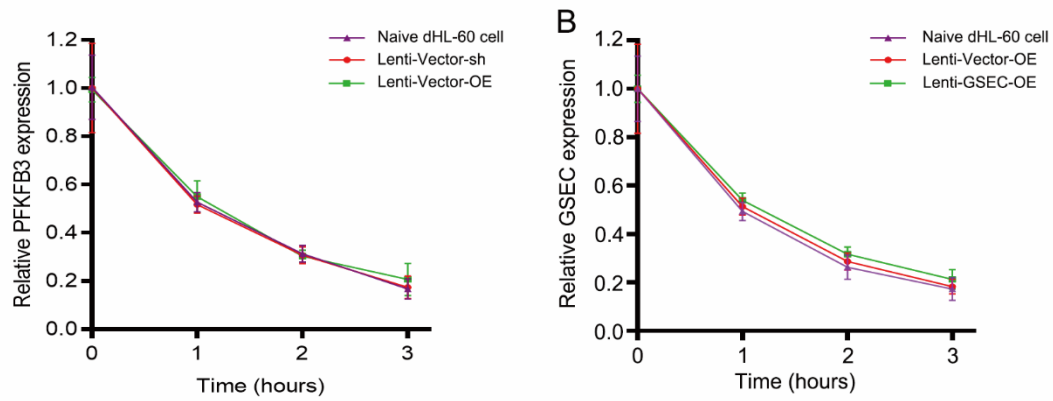

**Supplementary Fig. 11 The stability of PFKFB3 expression in Lentivirus vectors stimulation and GSEC-overexpressing dHL-60 cells. A** Lentivirus vectors stimulation did not influence the stability of PFKFB3 mRNA. **B** GSEC-overexpression did not reduce the decay rate of GSEC lncRNA in dHL-60 cells. For all experiments: n = 4 per group, three independent experiments.

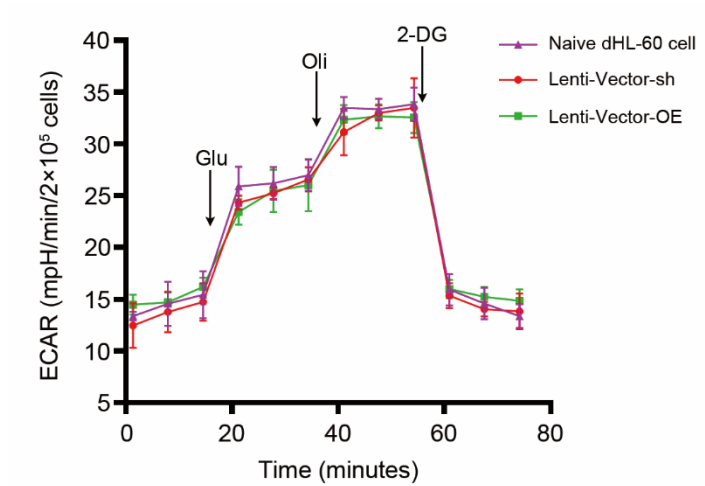

**Supplementary Fig. 12 ECAR level between empty vectors and naive dHL-60 cells.**

There was no statistically difference of ECAR level between empty vectors and naive dHL-60 cells. For all experiments: n = 4 per group, three independent experiments. Glu: glucose; Oli: oligomycin; 2-DG: 2-deoxyglucose.

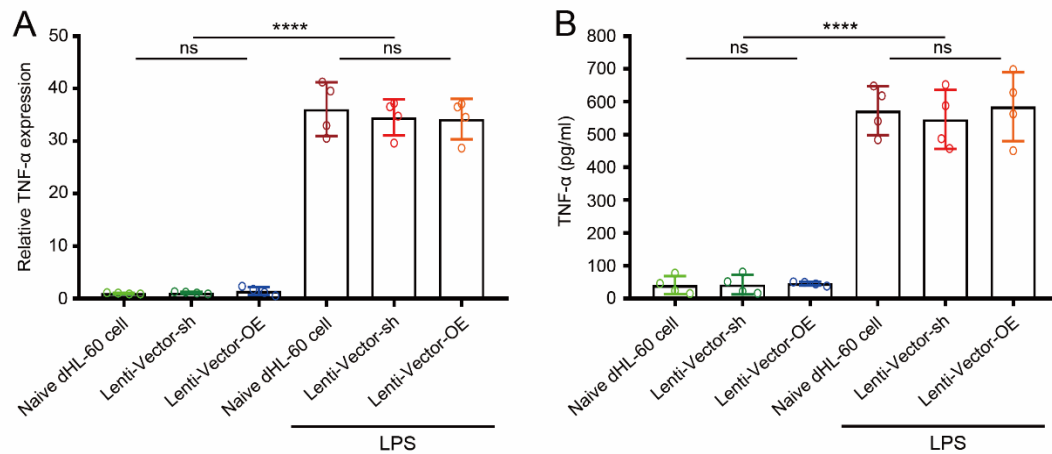

**Supplementary Fig. 13 TNF- $\alpha$  level between empty vectors and naive dHL-60 cells.**

**A** The lentivirus vectors do not affect the expression of TNF- $\alpha$  mRNA in dHL-60 cells with or without LPS stimulation. **B** The lentivirus vectors do not affect the level of TNF- $\alpha$  proteins in dHL-60 cells with or without LPS stimulation. For all experiments:  $n = 4$  per group, three independent experiments. Statistics were calculated using one-way ANOVA with Tukey post-tests. \*\*\* $P < 0.0001$ , <sup>ns</sup> $P$  indicate no statistical.

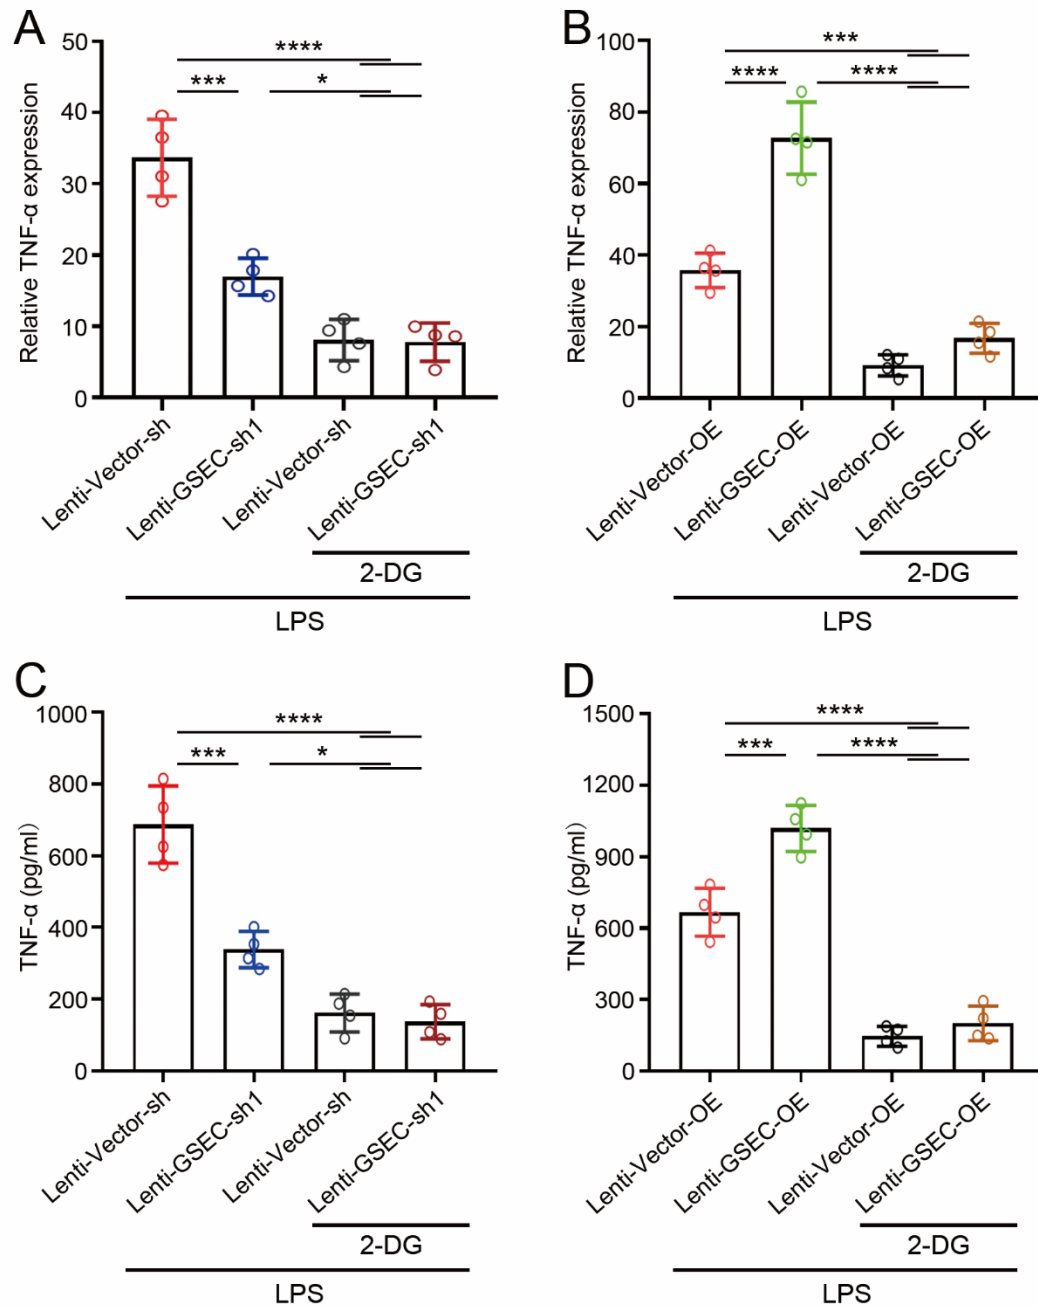

**Supplementary Fig. 14 Treatment with 2-Deoxy-D-Glucose (2-DG) reduced the expression of TNF- $\alpha$ .** **A** 2-DG reduced the expression of TNF- $\alpha$  mRNA in dHL-60 cells with or without GSEC-knockdown. **B** 2-DG reduced the expression of TNF- $\alpha$  mRNA in dHL-60 cells with or without GSEC-overexpression. **C** 2-DG reduced the level of TNF- $\alpha$  proteins in dHL-60 cells with or without GSEC-knockdown. **D** 2-DG reduced the level of TNF- $\alpha$  proteins in dHL-60 cells with or without GSEC-overexpression. For all experiments:  $n = 4$  per group, three independent experiments. Statistics were calculated using one-way ANOVA with Tukey post-tests. \* $P < 0.05$ , \*\*\* $P < 0.001$ , \*\*\*\* $P < 0.0001$ .



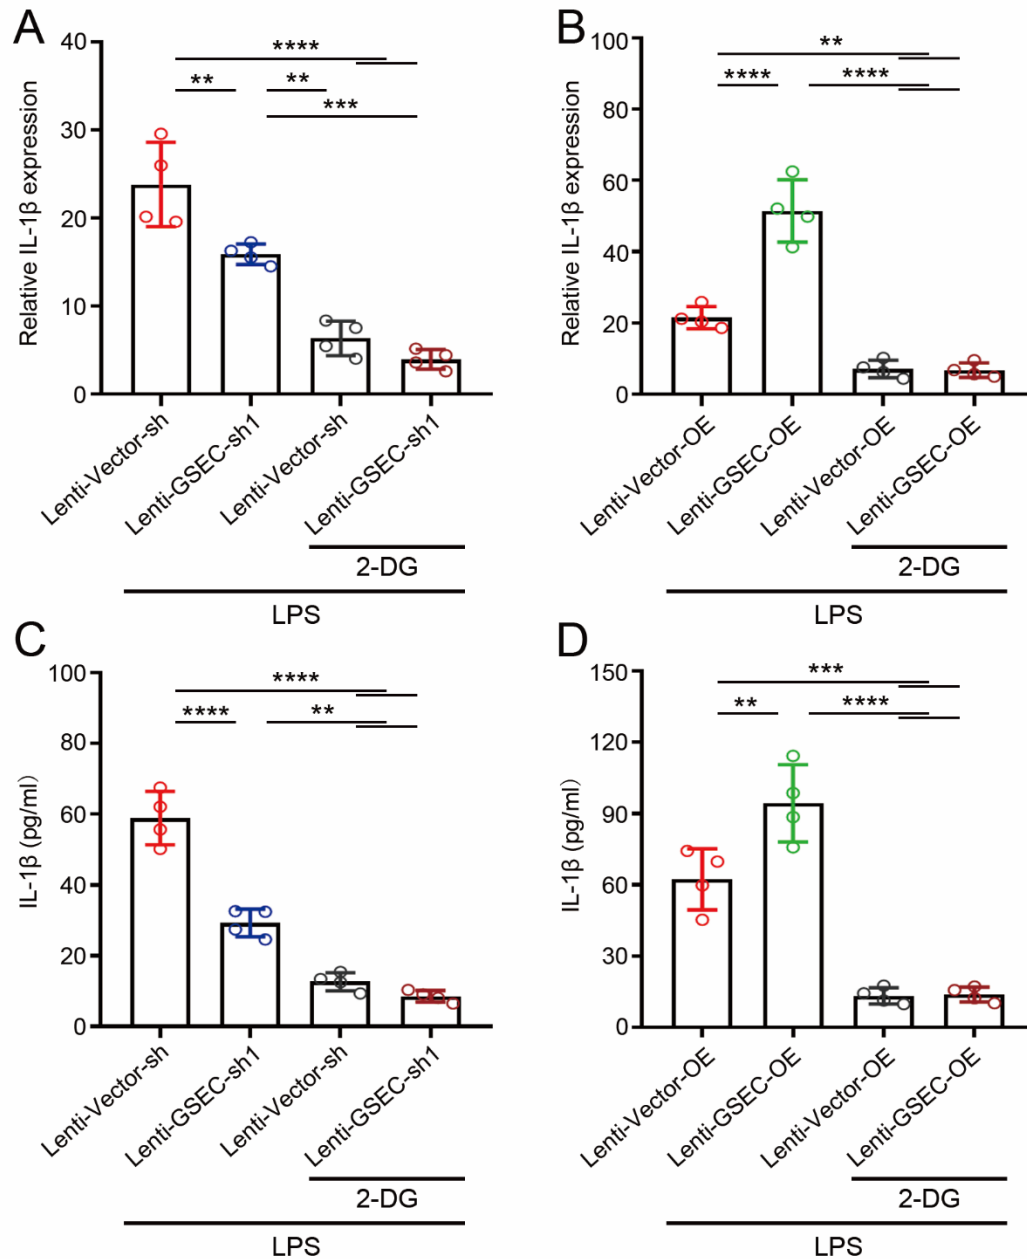

**Supplementary Fig. 16 Treatment with 2-DG reduced the expression of IL-1 $\beta$ .** **A** 2-DG reduced the expression of IL-1 $\beta$  mRNA in dHL-60 cells with or without GSEC-knockdown. **B** 2-DG reduced the expression of IL-1 $\beta$  mRNA in dHL-60 cells with or without GSEC-overexpression. **C** 2-DG reduced the level of IL-1 $\beta$  proteins in dHL-60 cells with or without GSEC-knockdown. **D** 2-DG reduced the level of IL-1 $\beta$  proteins in dHL-60 cells with or without GSEC-overexpression. For all experiments: n = 4 per group, three independent experiments. Statistics were calculated using one-way ANOVA with Tukey post-tests. \* $P < 0.05$ , \*\*\* $P < 0.001$ , \*\*\*\* $P < 0.0001$ .

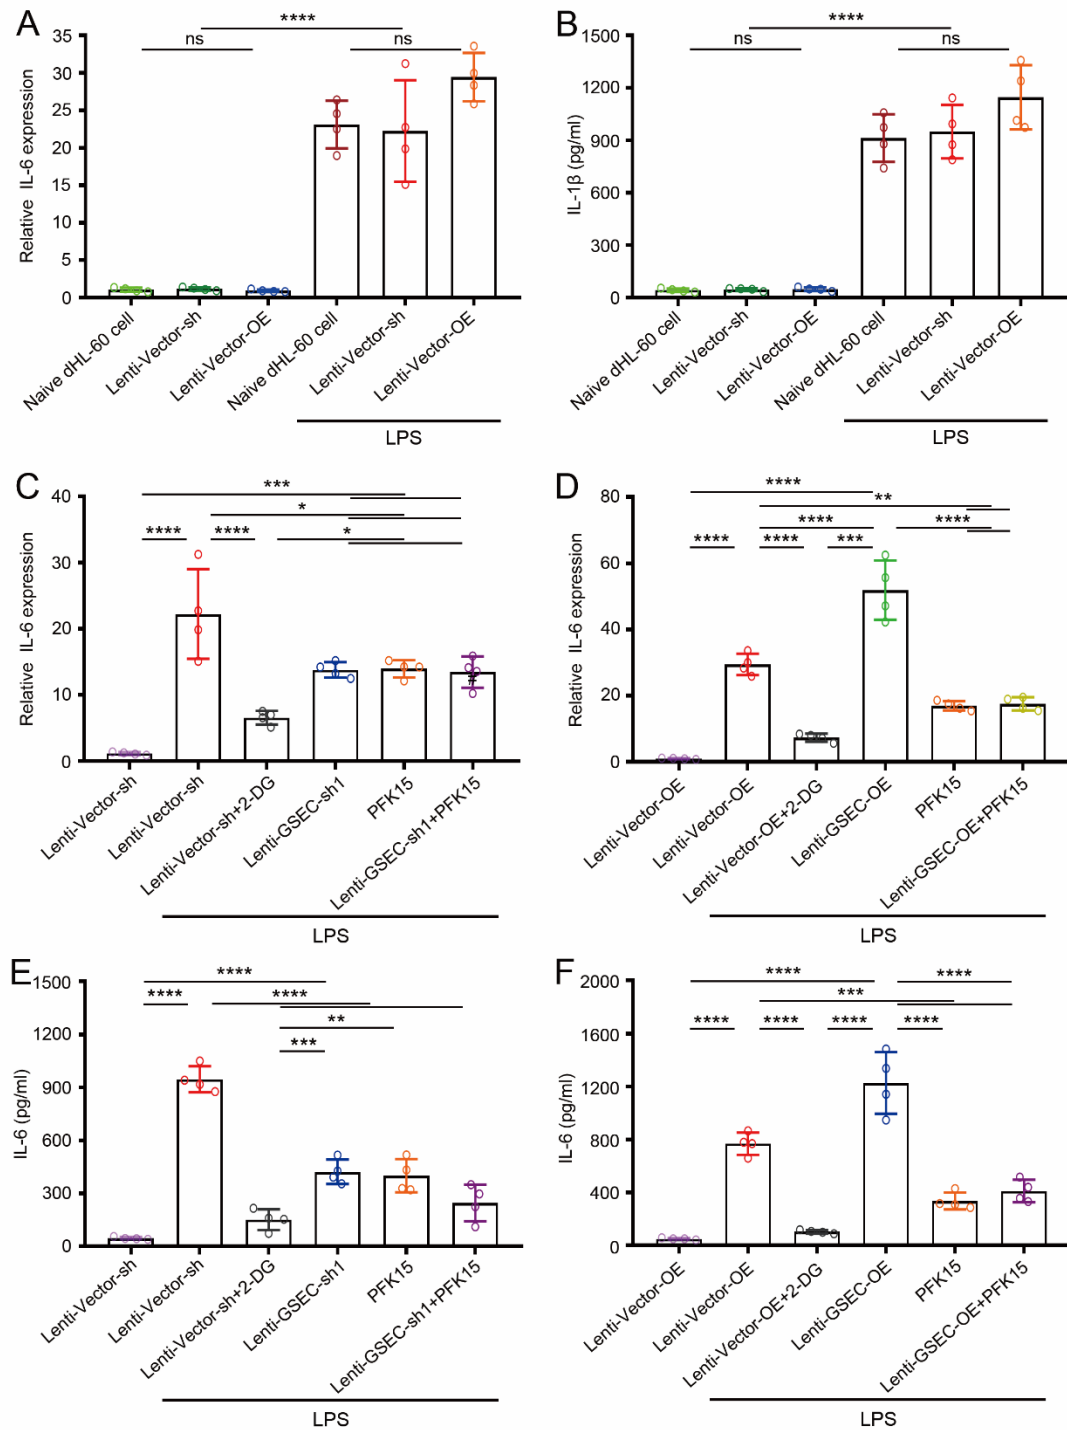

**Supplementary Fig. 17 The level of IL-6 in LPS stimulated dHL-60 cells.** **A** The level of IL-6 mRNA was detected in lentivirus vectors transfected dHL-60 cells with or without LPS stimulation. **B** The level of IL-6 protein was detected in lentivirus vectors transfected dHL-60 cells with or without LPS stimulation. **C** The level of IL-6 mRNA was detected in lncRNA GSEC-knockdown dHL-60 cells. **D** The level of IL-6 mRNA was detected in lncRNA GSEC-overexpressing dHL-60 cells. **E** The level of IL-6 protein was detected in lncRNA GSEC-knockdown dHL-60 cells. **F** The level of IL-6 protein was detected in lncRNA GSEC-overexpressing dHL-60 cells. For all experiments: n = 4 per group, three independent experiments. Statistics were calculated using one-way ANOVA with Tukey post-tests. \* $P < 0.05$ , \*\* $P < 0.01$ , \*\*\* $P < 0.001$ , \*\*\*\* $P < 0.0001$ , <sup>ns</sup> $P$  indicate no statistical.

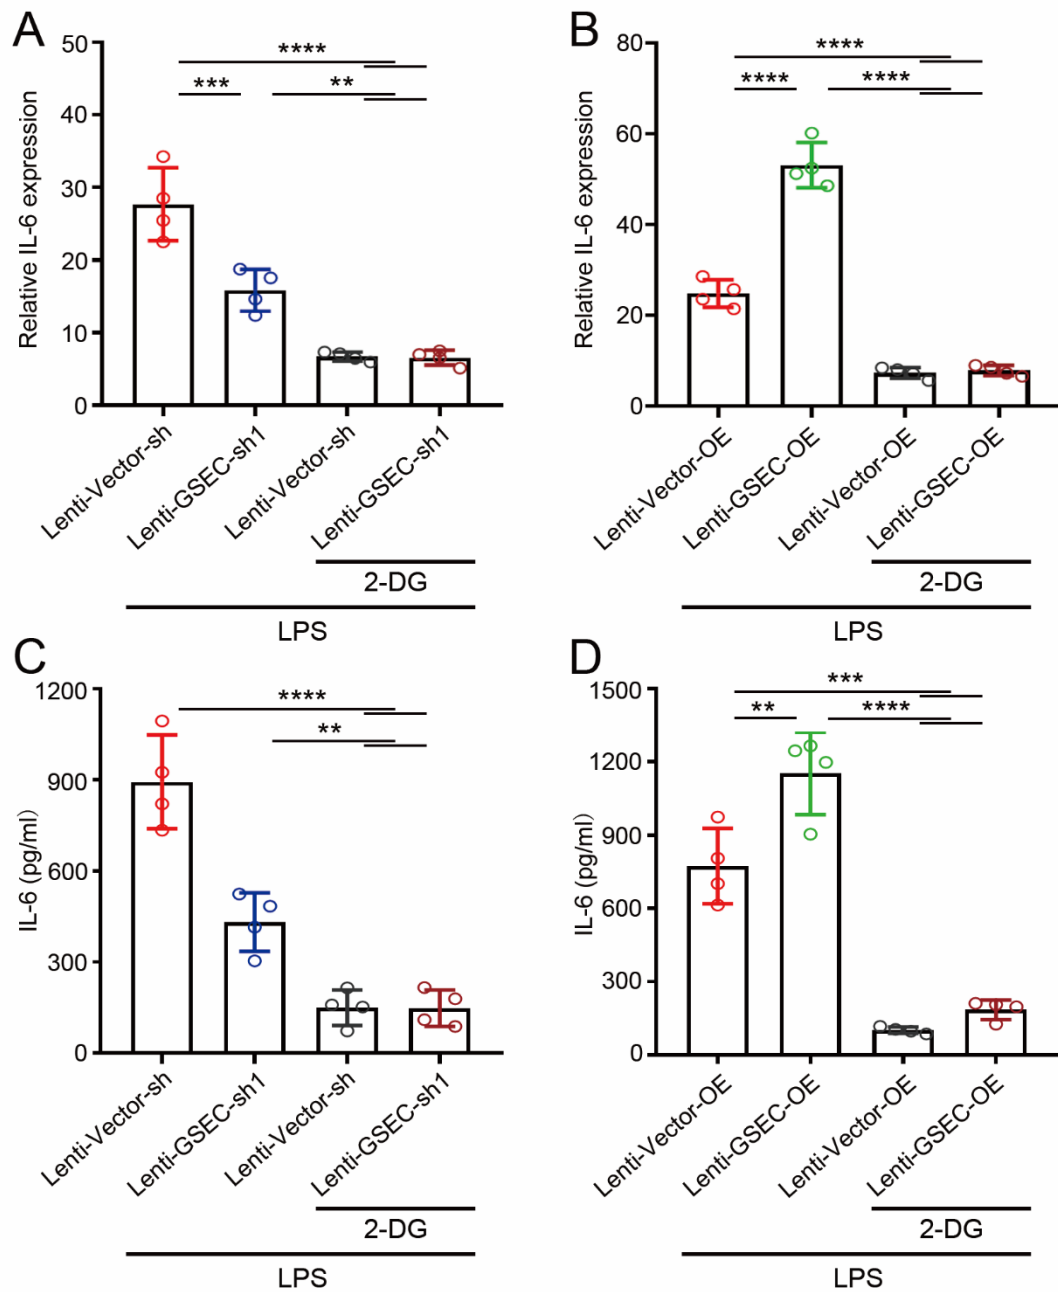

**Supplementary Fig. 18 Treatment with 2-DG reduced the expression of IL-6.** **A** 2-DG reduced the expression of IL-6 mRNA in dHL-60 cells with or without GSEC-knockdown. **B** 2-DG reduced the expression of IL-6 mRNA in dHL-60 cells with or without GSEC-overexpression. **C** 2-DG reduced the level of IL-6 proteins in dHL-60 cells with or without GSEC-knockdown. **D** 2-DG reduced the level of IL-6 proteins in dHL-60 cells with or without GSEC-overexpression. For all experiments:  $n = 4$  per group, three independent experiments. Statistics were calculated using one-way ANOVA with Tukey post-tests. \* $P < 0.05$ , \*\*\* $P < 0.001$ , \*\*\*\* $P < 0.0001$ .

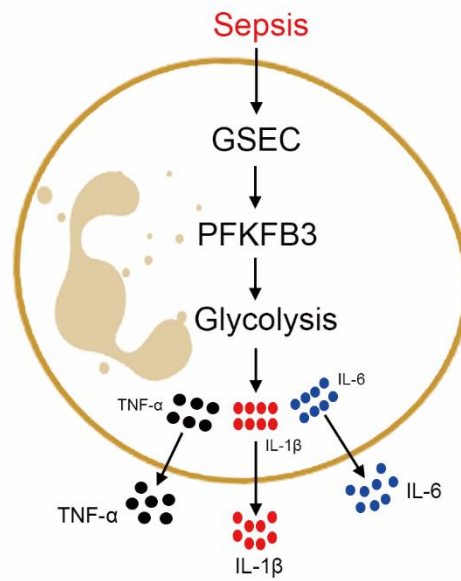

**Supplementary Fig. 19 GSEC regulated PFKFB3-mediated glycolytic reprogramming is a potential sepsis therapeutic target.** GSEC lncRNA has a pivotal role in promoting glycolysis of neutrophils by enhancing PFKFB3 transcription and translation, thus facilitating the neutrophil inflammatory factors production during the acute phase of sepsis.

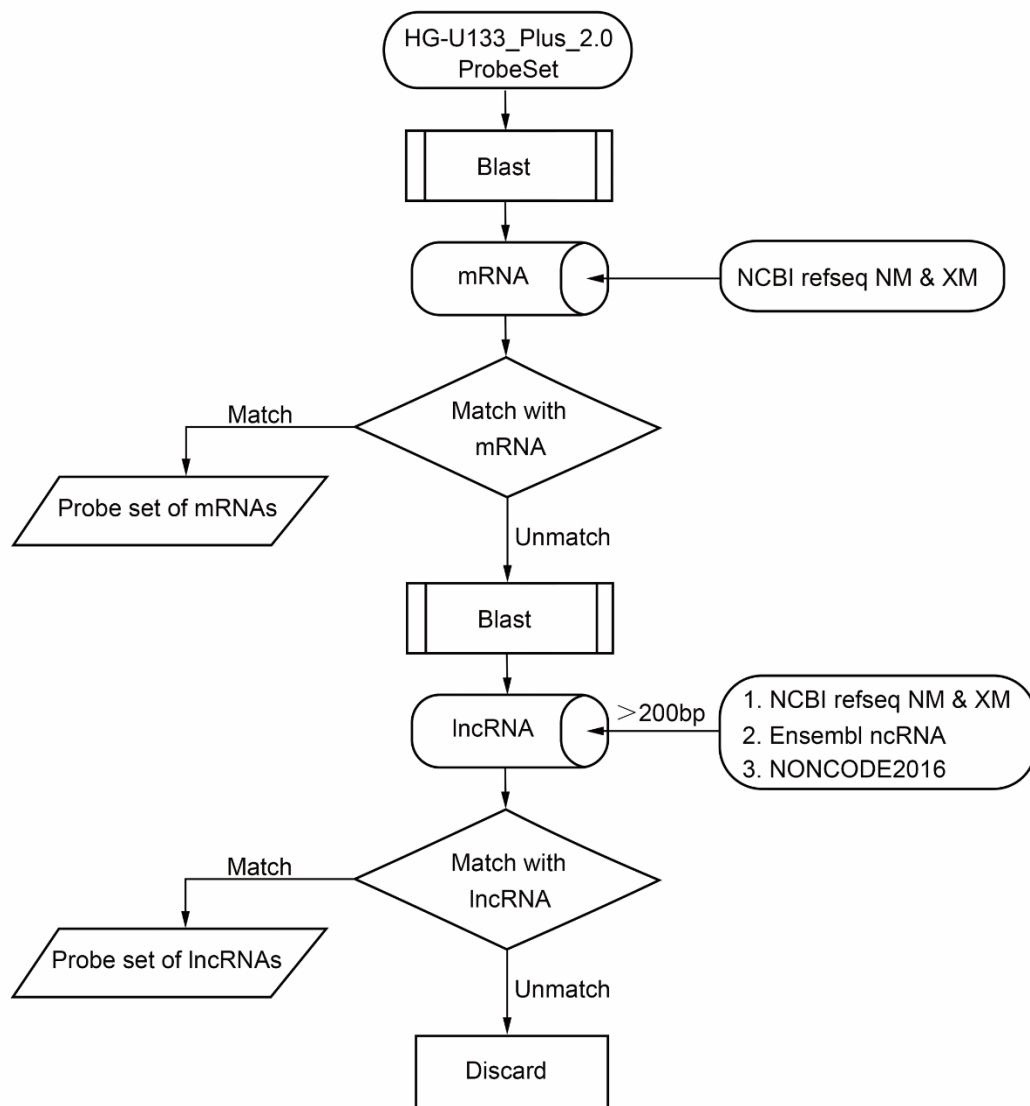

**Supplementary Fig. 20** The work flow of the HG-U133\_Plus\_2.0 annotation.

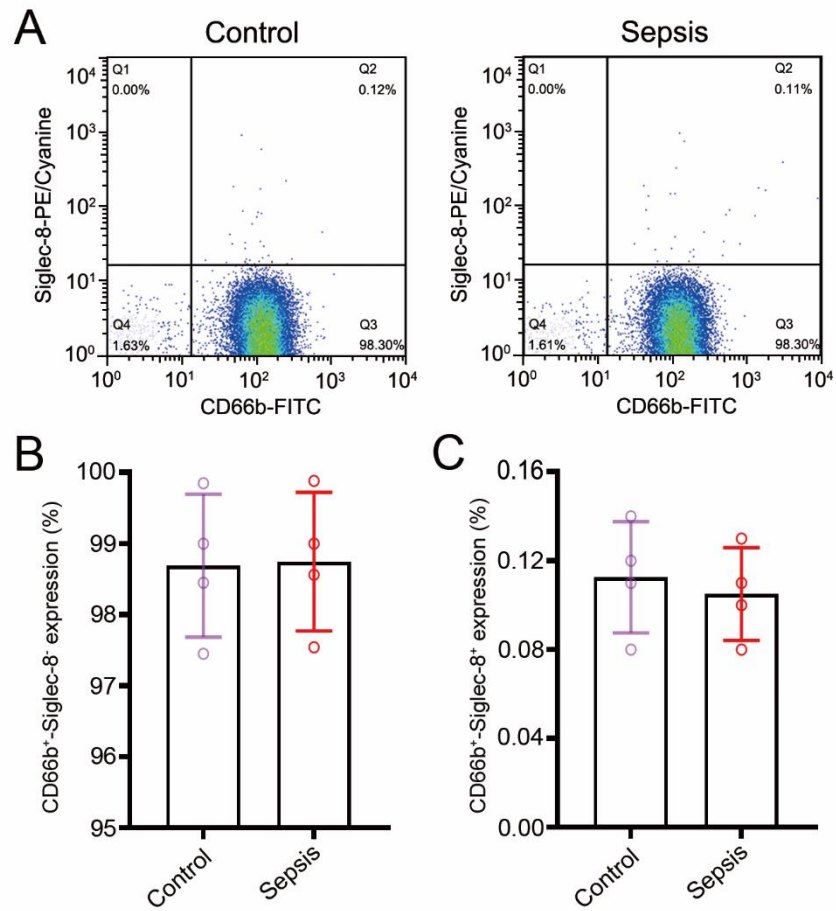

**Supplementary Fig. 21** The purity of neutrophils was detected and adjusted by flow cytometry with co-staining CD66b with Siglec-8. **A** Representative images of neutrophils detection by flow cytometry. **B** Mean fluorescence intensity of CD66b<sup>+</sup>-Siglec-8<sup>-</sup> cells. **C** Mean fluorescence intensity of CD66b<sup>+</sup>-Siglec-8<sup>+</sup> cells.

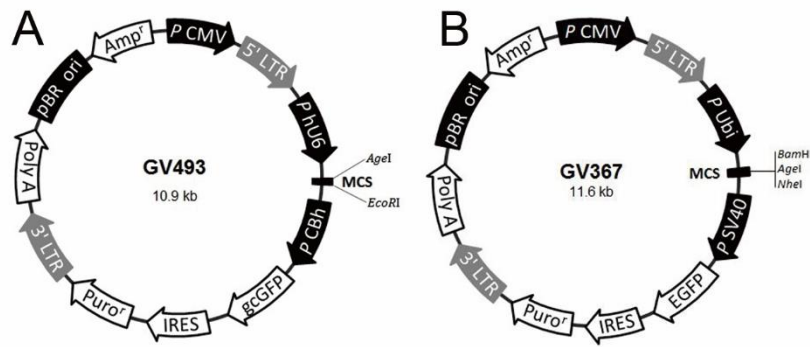

**Supplementary Fig. 22 Schematic of lentivirus vectors.** **A.** Schematic of the GV493 lentivirus vector. Two specific target sequences for GSEC (5'-GGTCACAACAGTACAAAGA-3', and 5'-CCAACTATGCCATGGTCTT-3') were respectively cloned into the MCS region of GV493 (hU6-MCS-CBh-gcGFP-IRES-puromycin) to construct knock down lentivirus vectors of GSEC, named as Lenti-GSEC-sh1 and Lenti-GSEC-sh2. **B** Schematic of the GV367 lentivirus vector. A specific target sequence for GSEC (NONHSAT160878.1) was cloned into the MCS region of GV367 (Ubi-MCS-SV40-EGFP-IRES-puromycin) to construct overexpression lentivirus vectors of GSEC, named as Lenti-GSEC-OE.

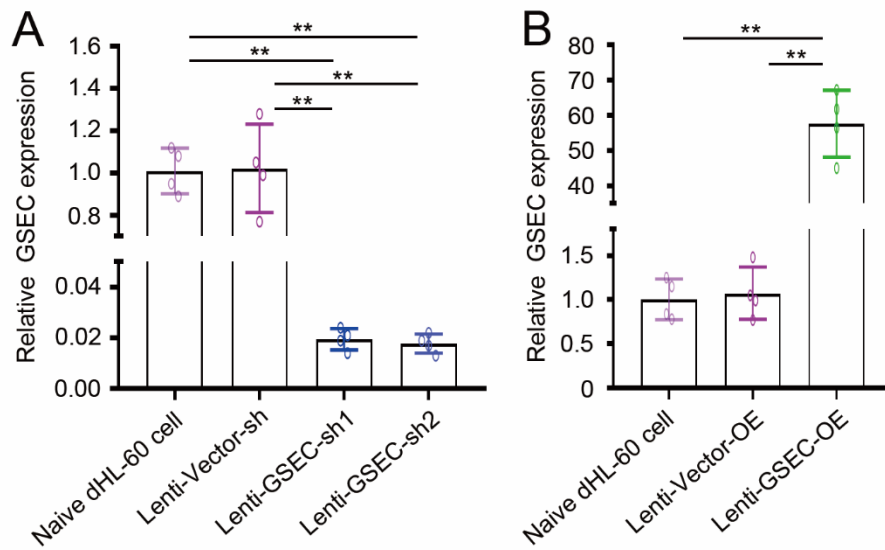

**Supplementary Fig. 23 The expression of GSEC in dHL-60 cells.** **A** Both Lenti-GSEC-sh1 and Lenti-GSEC-sh2 significantly reduced the expression of GSEC, and lenti-vector-sh does not reduce the expression of GSEC. **B** Lenti-GSEC-OE significantly increased the expression of GSEC, and lenti-vector-OE does not increase the expression of GSEC. For all experiments:  $n = 4$  per group, three independent experiments.  $**P < 0.01$ .

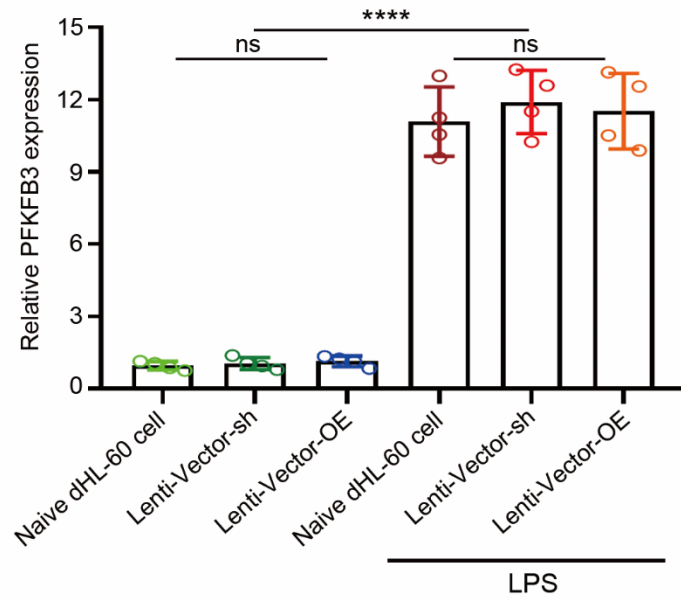

**Supplementary Fig. 24. Expression of PFKFB3 mRNA between empty vectors and naive dHL-60 cells.** The lentivirus vectors do not affect the expression of PFKFB3 mRNA in dHL-60 cells with or without LPS stimulation. For all experiments:  $n = 4$  per group, three independent experiments. Statistics were calculated using one-way ANOVA with Tukey post-tests.  $***P < 0.0001$ ,  $^{ns}P$  indicate no statistical.
